# Supplementary material for: Patient safety during procedural sedation using capnography monitoring: a systematic review and meta-analysis
Source: PubMed Central journal article supplement — BMJ Open. 2017 Jun 30;7(6):e013402. doi: 10.1136/bmjopen-2016-013402 (PMC5734204; doi:10.1136/bmjopen-2016-013402), 2017-06-30
Supplement: bmjopen-2016-013402.draft_revisions.pdf [file bmjopen-2016-013402.draft_revisions.pdf]

# BMJ Open

## PATIENT SAFETY DURING PROCEDURAL SEDATION USING CAPNOGRAPHY MONITORING: A SYSTEMATIC REVIEW AND META-ANALYSIS

|                                                                                                                                                                                                                                |                                                                                                                                                                                                                                                                                                                                                                   |
|--------------------------------------------------------------------------------------------------------------------------------------------------------------------------------------------------------------------------------|-------------------------------------------------------------------------------------------------------------------------------------------------------------------------------------------------------------------------------------------------------------------------------------------------------------------------------------------------------------------|
| Journal:                                                                                                                                                                                                                       | <i>BMJ Open</i>                                                                                                                                                                                                                                                                                                                                                   |
| Manuscript ID                                                                                                                                                                                                                  | bmjopen-2016-013402                                                                                                                                                                                                                                                                                                                                               |
| Article Type:                                                                                                                                                                                                                  | Research                                                                                                                                                                                                                                                                                                                                                          |
| Date Submitted by the Author:                                                                                                                                                                                                  | 13-Jul-2016                                                                                                                                                                                                                                                                                                                                                       |
| Complete List of Authors:                                                                                                                                                                                                      | Saunders, Rhodri; Coreva Scientific GmbH & Co. KG.<br>Struys, Michel; University of Groningen, Department of Anesthesiology<br>Pollock, Richard; Ossian Health Economics and Communications GmbH,<br>Mestek, Michael; Medtronic Inc, Patient Monitoring & Recovery<br>Lightdale, Jenifer; UMass Memorial Children's Medical Center, Pediatric<br>Gastroenterology |
| <b>Primary Subject<br>Heading</b>:                                                                                                                                                                                             | Anaesthesia                                                                                                                                                                                                                                                                                                                                                       |
| Secondary Subject Heading:                                                                                                                                                                                                     | Surgery                                                                                                                                                                                                                                                                                                                                                           |
| Keywords:                                                                                                                                                                                                                      | Capnography, Meta-analysis, Procedural sedation, Ambulatory surgery                                                                                                                                                                                                                                                                                               |
| <p>Note: The following files were submitted by the author for peer review, but cannot be converted to PDF. You must view these files (e.g. movies) online.</p> <p>Capnography Meta-analysis BMJ PRISMA 2009 checklist.docx</p> |                                                                                                                                                                                                                                                                                                                                                                   |

SCHOLARONE™  
Manuscripts

**PATIENT SAFETY DURING PROCEDURAL SEDATION USING CAPNOGRAPHY****MONITORING: A SYSTEMATIC REVIEW AND META-ANALYSIS**

**Authors:** Rhodri Saunders DPhil<sup>1,2</sup>, Michel MRF Struys MD PhD FRCA (Hon)<sup>3</sup>,  
Richard F Pollock MA MSci<sup>2</sup>, Michael Mestek PhD<sup>4</sup>, Lightdale JR MD MPH<sup>5</sup>

**Affiliations:** <sup>1</sup> Coreva Scientific GmbH & Co. KG., Freiburg, Germany  
<sup>2</sup> Ossian Health Economics and Communications, Basel, Switzerland  
<sup>3</sup> Department of Anesthesiology, University of Groningen, University  
Medical Center Groningen, Groningen, The Netherlands; Department of  
Anesthesia, Ghent University, Gent, Belgium  
<sup>4</sup> Medtronic, Patient Monitoring & Recovery, Boulder, CO  
<sup>5</sup> Pediatric Gastroenterology, UMass Memorial Children's Medical Center,  
Worcester, MA; University of Massachusetts Medical School, Worcester,  
MA

**Corresponding author:** Richard Pollock MA MSci  
Ossian Health Economics and Communications GmbH,  
Bäumleingasse 20,  
4051 Basel, Switzerland  
+41 61 271 62 14  
pollock@ossianconsulting.com

**Word count:** 3,572

**Running title:** Patient safety during sedation: a meta-analysis

**Key words:** Capnography; Respiratory compromise; Oxygen desaturation; Apnea;  
Assisted ventilation;

**Target journal:** BMJ

**Grant support:** This study was supported by funding from Medtronic plc.

## ABSTRACT

### Objective

To evaluate the effect of capnography monitoring on sedation-related adverse events during PSA administered during ambulatory surgery relative to visual assessment and pulse oximetry alone.

### Design and Setting

Systematic literature review and random effects meta-analysis of randomized controlled trials (RCTs) reporting sedation-related adverse event incidence when adding capnography to visual assessment and pulse oximetry in patients undergoing PSA during ambulatory surgery in the hospital setting. Searches for eligible studies published between 1995 and 2015 (inclusive) were conducted in PubMed, the Cochrane Library and EMBASE without any language constraints. Searches were conducted in June, 2015.

### Interventions

Capnography monitoring relative to visual assessment and pulse oximetry alone.

### Primary and Secondary Outcome Measures

Predefined endpoints of interest were desaturation/hypoxemia (the primary endpoint), apnea, aspiration, bradycardia, hypotension, premature procedure termination, respiratory failure, use of assisted/bag-mask ventilation and death during PSA.

### Results

The literature search identified 861 unique articles, of which 11 were ultimately included in the meta-analysis. Addition of capnography to visual assessment and pulse oximetry was associated with a significant reduction in the incidence of apnea (OR 0.49, 95% CI 0.32–0.75), as well as mild (OR 0.54, 95% CI 0.44–0.66) and severe (OR 0.49, 95% CI 0.34–0.71) desaturation. Reduced occurrence of assisted ventilation was also observed with capnography, but this did not reach significance.

## Conclusions

Meta-analysis of 11 RCTs published between 2006 and 2015 showed a reduction in respiratory compromise during PSA with the inclusion of capnography monitoring. In particular, use of capnography was associated with less mild and severe oxygen desaturation, and may help to avoid the need for assisted ventilation.

## STRENGTHS AND LIMITATIONS OF THIS STUDY

### Strengths

- The studies included in the analysis were all published in 2006 or later, representing modern medical practice and providing consistent evidence of improvements in patient safety with the use of capnography monitoring.
- The study findings further substantiate a previously-published meta-analysis, which found that capnography monitoring was more likely to detect adverse events.

### Limitations

- The level of sedation employed in each study was not uniformly reported, resulting in a mixture of different sedation levels in the primary analysis and precluding an analysis of outcomes by sedation level.
- As with all meta-analyses, the study findings may be affected by publication, search or selection bias affecting the studies ultimately included in the analysis; however, where possible, steps were taken to minimize the effects of bias on the analysis, but the degree to which these steps were successful is difficult to quantify.

## BACKGROUND AND AIMS

The administration of procedural sedation and analgesia (PSA) involves achieving a drug-induced depression in level of consciousness and pain to ensure the comfort and cooperation of patients undergoing non-surgical procedures. Significant adverse events associated with PSA are relatively rare but not inconsequential, and can include severe oxygen desaturation, bradycardia, hypotension, and cardiac arrest.<sup>1,2</sup> Consensus dictates that levels of sedation are directly related to patient risk during PSA, as is the potential for unintended progression from moderate to deep sedation.<sup>3</sup> Generally speaking, most cardiopulmonary events associated with PSA stem from poor or absent ventilation cascading into hypoxia, tissue injury and cardiac decompensation (Supplement, Figure 3). In turn, maintaining patient safety involves the identification of respiratory compromise to prompt the use of clinical intervention before further complications occur.<sup>4,5,6,7,8,9</sup>

In current clinical practice, patient monitoring during PSA often relies on visual assessment of ventilation and use of pulse oximetry, which reflects hypoxemia.<sup>10,11,12,13,14</sup> To date, a mandate to include capnography in patient monitoring, as a means of early detection of alveolar hypoventilation, has remained a topic of debate.<sup>15</sup> In particular, there has been a perceived gap between various study outcomes and evidence of improved patient safety. No studies have provided “hard proof” that addition of capnography to patient monitoring may reduce severe morbidity and mortality during PSA (in part because of ethical considerations to ensure patient rescue), and efforts to use meta-analysis to determine the utility of capnography to identify clinically significant respiratory depression have been faulted for large heterogeneity and non-standard endpoints.<sup>16,17</sup>

The primary aim of the present systematic review and meta-analysis was to understand whether capnography added to patient monitoring only (consisting of pulse oximetry and visual inspection of ventilation) reduces the incidence of adverse events during PSA based on randomized controlled trials of patients undergoing a variety of surgical procedures. As a secondary aim, a power calculation was performed to determine the number of patients that would be required to demonstrate a reduction in

1  
2  
3 patient harm, defined as severe morbidity or mortality, in a prospective clinical trial of capnography  
4  
5 versus visual assessment with pulse oximetry. The analysis was based on the hypothesis that earlier  
6  
7 and more sensitive detection of ventilatory changes with capnography may allow for more timely  
8  
9 intervention and prevention of potential adverse events, such as cardiac dysrhythmias. Throughout the  
10  
11 analyses, we sought to provide the highest level of synthesized evidence with respect to the clinical  
12  
13 utility of capnography monitoring during PSA. To mitigate potential pitfalls due to non-standard  
14  
15 endpoints, particular emphasis was placed on maintaining a consistent definition of adverse events  
16  
17 across all studies included.  
18  
19

## 20 21 **METHODS**

22  
23 Literature searches were conducted in PubMed, the Cochrane Library and EMBASE. Search terms were  
24  
25 a combination of Medical Subject Heading (MeSH) terms and free-text searches within the articles title  
26  
27 and abstract. Searches aimed to identify all literature reporting on randomized, controlled trials in  
28  
29 patients receiving sedation during ambulatory surgery and in which visual assessment of ventilation  
30  
31 and pulse oximetry monitoring (control) was compared with control plus capnography. No review  
32  
33 protocol was registered in advance, but the full search strategy (Supplement, Table 3) and further  
34  
35 details are provided in the Supplement. Only articles or abstracts published on or after January 1, 1995  
36  
37 were included and all searches were performed on June 17, 2015. No language exclusion was applied  
38  
39 and inclusion was not dependent on the capnography monitor in use. After duplicate removal, title  
40  
41 and abstract screening (Supplement, Table 4) was performed independently by RS and RFP. Full-text  
42  
43 versions of all non-excluded articles were retrieved by MM and reviewed independently by RS and  
44  
45 RFP. Data were then extracted independently by RS and RFP into data extraction forms in Microsoft  
46  
47 Excel (Microsoft Corporation, Redmond, WA). Any discrepancies in the extracted data were resolved  
48  
49 by reference to the original study, reaching consensus between RS and RFP. All extracted endpoint  
50  
51 data were reviewed by JL and MMS for clinical utility to ensure that all synthesized data relate to  
52  
53  
54  
55  
56  
57  
58  
59  
60

1  
2  
3 clinically equivalent endpoints. Extracted data included the number of patients with events and the  
4  
5 population at risk, in addition to items required to assess article quality and bias.  
6  
7

### 8 **Endpoints**

9  
10 Predefined endpoints of interest were desaturation/hypoxemia (the primary endpoint), apnea,  
11  
12 aspiration, bradycardia, hypotension, premature procedure termination, respiratory failure, use of  
13  
14 assisted/bag-mask ventilation and death during PSA. The protocol was left open for the analysis of  
15  
16 other patient safety endpoints that were reported by  $\geq 3$  studies. Cardiac arrest and death were  
17  
18 considered to be representative of severe morbidity and mortality.  
19  
20

### 21 **Quality and potential bias**

22  
23 Assessment of article quality was conducted on a study (as opposed to outcome) level using a  
24  
25 modified Jadad scale,<sup>18</sup> with additional criteria added to make the adaptation specific to monitoring.  
26  
27 The Jadad scale scores articles on their design (randomized and blinded) and their reporting (all  
28  
29 patients accounted for), with a maximal score of 5 (high quality) and a low score of 0 (low quality).  
30  
31 Additional data included here were endpoint definitions, patient population, hospital location at which  
32  
33 patients underwent sedation, and the staff responsible for monitoring. In keeping with Jadad, items  
34  
35 related to trial design could score up to twice as highly as items relating to trial reporting. The  
36  
37 reporting of the inclusion/exclusion criteria and endpoint definitions scored one point each, and  
38  
39 reporting the location of sedation, and the monitoring staff scored half-point point each, making the  
40  
41 maximal score 8 (high quality). For the purposes of analyzing study quality, studies with scores of 0–5  
42  
43 were considered to be low quality, while studies scoring 5.5–8 were designated as high quality studies.  
44  
45  
46  
47 Risk of bias in results was evaluated through the declaration of funding sources and conflicts of  
48  
49 interest. If the study was funded by industry then the study scored 2, any conflicts of interest declared  
50  
51 relating to industry funding outside of the current research publication scored 1. A study with low  
52  
53 potential for bias, therefore, would have a score of 0. A high potential for bias was defined as a score  
54  
55 of 3, while a score of 1–2 was considered to indicate moderate potential for bias.  
56  
57  
58  
59  
60

## Analysis

Data extraction, initial data consolidation and summary statistics were performed in Microsoft Excel.

Data for each endpoint were subsequently entered into Review Manager 5.3.4 for results synthesis.<sup>19</sup>

Heterogeneity of data was evaluated using  $\text{Chi}^2$  and  $I^2$  statistics presented by Review Manager 5.3.4.

The meta-analysis performed calculated the mean intervention effect across all eligible studies using (after analysis of heterogeneity) a random effects model as described by DerSimonian and Laird.<sup>20</sup> An

estimate of between-study variation was provided by the Mantel-Haenszel methodology.<sup>21</sup> The

outcome reported for each endpoint is the pooled mean odds ratio (OR) and its 95% confidence interval.

For sensitivity analyses, the tested conditions were: (1) inclusion of only moderate sedation, (2) inclusion of only studies with low risk of bias, (3) inclusion of only studies based in the US, (4) inclusion of only studies based in Europe, (5) exclusion of pediatric data, (6) exclusion of gender-specific studies, (7) exclusion of data in patients <30 years of age.

## Patient involvement

No patients, service users, carers or lay people were involved in the design or conduct of this study.

Outcome measures were all related to patient safety during PSA, but were not developed based on an explicit elicitation of patient priorities, experience, and preferences.

## RESULTS

Literature searches of PubMed, the Cochrane Library and EMBASE returned 353, 76, and 672 articles, respectively. After removal of 240 duplicates (55 Cochrane, 185 EMBASE), 861 articles remained for abstract screening. Although reasons for exclusion varied (Supplement, Table 4), the two independent reviewers agreed upon a total of 19 articles to be retained for full-text review (Cohen's kappa, 1.0).

Eight articles were excluded on full-text review (Supplement, Figure 4) because they: reported duplicate data (n=3), did not report patient safety data (N=3), and did not include sedation (n=2). The



1  
2  
3 11 articles included for analysis are presented in Table 1. All studies reported desaturation endpoints,  
4  
5 although the definition did vary by study (Supplement, Table 5). Other endpoints were  
6  
7 heterogeneously reported, but were in most cases reported by  $\geq 3$  studies making meta-analysis  
8  
9 feasible. Results reported are from random-effects models unless otherwise stated. Results for  
10  
11 hypotension and use of supplemental oxygen are provided in the Supplement.  
12

### 13 **Mild desaturation**

14  
15  
16 All studies reported mild desaturation, with the definition varying from an oxygen saturation ( $\text{SpO}_2$ ) of  
17  
18  $<95\%$  to  $<90\%$  for  $\geq 15$  seconds. In the primary analysis of high quality studies ( $n=8$ ), there was little  
19  
20 evidence of heterogeneity ( $I^2 = 11\%$ ) and the mean OR did not differ between random-effects and  
21  
22 fixed-effects models. Results indicated that capnography significantly reduced the incidence of mild  
23  
24 desaturation (OR = 0.54, 95% CI 0.44–0.66; Figure 1). As such, a mild desaturation event is  
25  
26 approximately half as likely to occur if capnography monitoring is used, compared with no use of  
27  
28 capnography. If all available data were included (Supplement, Figure 5), there was evidence of  
29  
30 significant heterogeneity ( $I^2 = 49\%$ ) with an OR of 0.65 (95% CI 0.51–0.81). Using exclusively studies  
31  
32 with equivalent definitions of mild desaturation ( $<90\%$ ,  $n=6$ ), evidence of heterogeneity ( $I^2 = 47\%$ ) is  
33  
34 still present. The OR estimated from these studies was 0.60 (95% CI 0.46–0.77).  
35  
36  
37

### 38 **Severe desaturation**

39  
40  
41 Six studies, of which three were classified as high quality, reported severe desaturation. All but one of  
42  
43 the studies defined severe desaturation as  $\text{SpO}_2 < / \leq 85\%$ . The primary analysis for this endpoint  
44  
45 returned an OR of 0.49 (95% CI 0.34–0.71), further supporting the significant reduction in desaturation  
46  
47 incidence with the inclusion of capnography (Figure 1). As with mild desaturation, there was no  
48  
49 evidence of heterogeneity in the three high-quality studies ( $I^2 = 0\%$ ) and the OR was consistent  
50  
51 between random-effects and fixed-effects models.  
52

53  
54  
55 Synthesizing estimates from all available data supported the primary analysis (Supplement, Figure 6),  
56  
57 the OR was reduced by 0.02 and the confidence interval tightened (OR 0.47, 95% CI 0.34–0.66). There  
58  
59  
60

1  
2  
3 was no significant heterogeneity between studies ( $I^2 = 16\%$ ). Focusing on the five studies reporting an  
4  
5 endpoint of SpO<sub>2</sub>  $\leq 85\%$ , there was no heterogeneity and the OR was estimated at 0.44 (95% CI  
6  
7 0.32–0.60). Overall, results support a greater than 50% reduction in the incidence of severe  
8  
9 desaturation events if capnography monitoring is used.  
10

### 11 **Apnea**

12  
13 Apnea was less widely reported or reported in combination with disordered respiration. Comparable  
14  
15 endpoints were reported by four studies, of which two were high quality. Primary analysis  
16  
17 demonstrated a significant reduction in apnea with capnography monitoring (OR 0.49, 95% CI 0.32–  
18  
19 0.75), with no evidence of heterogeneity (Supplement, Figure 7). If all studies were included the  
20  
21 degree of heterogeneity became significant ( $I^2 = 75\%$ ) and the outcome lacked significance at the 5%  
22  
23 level (OR 0.75, 95% CI 0.43–1.33). The degree of between study heterogeneity supported the use of a  
24  
25 random-effects model, analysis using a fixed effects model did not change the estimated OR but did  
26  
27 restrict the 95% CI to 0.57–0.99. The difference between the primary and secondary analyses for this  
28  
29 endpoint was driven by the study of Kochhar et al., which found apnea to be increased in the  
30  
31 capnography arm.  
32  
33  
34  
35

### 36 **Bradycardia**

37  
38 Three studies, all of high-quality, reported bradycardia outcomes. Its definition (heart rate  $< 50$   
39  
40 beats/minute) was consistent among trials and there was no evidence of between study heterogeneity  
41  
42 ( $I^2 = 0\%$ ). In all studies, the incidence of bradycardia was higher in the capnography arm compared  
43  
44 with the control arm (Supplement, Figure 8). Overall, capnography monitoring was associated with a  
45  
46 non-significant increase in bradycardia (OR 1.23, 95% CI 0.87–1.74).  
47  
48  
49

### 50 **Assisted ventilation**

51  
52 Only one study reported one instance of what they termed “respiratory failure,” that was treated with  
53  
54 assisted bag-mask ventilation. In contrast, the number of studies reporting assisted and/or bag-mask  
55  
56 ventilation was sufficient to perform a meta-analysis of this endpoint as a surrogate for respiratory  
57  
58  
59  
60

1  
2  
3 failure. In total, five studies reported this and all were classified as high-quality. The primary analysis  
4  
5 returned no evidence of heterogeneity and an OR of 0.83 (95% CI 0.59–1.17). In every case, the need  
6  
7 to provided assisted ventilation was lower in the capnography arm compared with the control arm  
8  
9 (Figure 2). The lack of significance reflects the low number of observed events and the subsequent  
10  
11 potential for error.  
12

### 13 **Sensitivity analyses**

14  
15 A series of sensitivity analyses were conducted in which the studies included in the estimation of the  
16  
17 OR were varied. The results of these analyses are presented in Table 2 and show that results are  
18  
19 generally robust to the studies included for data synthesis. There were limited data available to assess  
20  
21 the impact of capnography monitoring during moderate sedation. Data available indicate that the  
22  
23 impact of capnography is reduced relative to deep sedation. With respect to severe desaturation  
24  
25 events, there was also a substantial difference between US and European data. In Europe, addition of  
26  
27 capnography monitoring was estimated to reduce the incidence of severe desaturation by about 40%.  
28  
29 For the US based studies this increased to 65%, meaning that almost 2 in 3 severe desaturation events  
30  
31 were avoided.  
32  
33  
34  
35

36  
37 Patient safety concerns often focus on mortality and severe morbidity. There was no evidence that  
38  
39 these outcomes differ between control and capnography arms in the present meta-analysis. The  
40  
41 incidence of these events during nurse-administered PSA has been reported to be 1 event per 303  
42  
43 procedures (0.33%).<sup>22</sup> Taking this value and using the assumption that capnography could prevent  
44  
45 50% of events, the formula provided by Zhong (2009) to calculate the trial size required to  
46  
47 demonstrate statistical superiority returned 27,726 patients.<sup>23</sup> Switching to an assumption that  
48  
49 capnography would prevent 10% of events, the required trial size was calculated to be >900,000  
50  
51 patients.  
52  
53  
54  
55  
56  
57  
58  
59  
60

## DISCUSSION

The findings of a meta-analysis of recent RCTs comparing visual assessment of ventilation and pulse oximetry monitoring with and without capnography during PSA showed that the incidence of apnea and oxygen desaturation events were significantly reduced with the use of capnography. Other endpoints that could be affected by capnography monitoring were also considered and the majority was found to be associated with substantial, but not significant, benefits to patient safety. Specifically, and of potential clinical importance, was the consistency of data across multiple high-quality clinical trials reporting a reduced incidence of assisted ventilation with capnography monitoring. No endpoints assessed in the meta-analysis indicated significant patient safety concerns with capnography. In addition, sensitivity analyses suggested that a clinical trial designed to test for a significant difference in patient harm with use of capnography would require an unfeasibly large number of patients. Not only is the feasibility of performing such a superiority trial low, but meta-analyses such as the present study, are not able to detect this difference from the relatively small number of existing lower-powered studies currently available in peer-reviewed medical literature.

The analysis is timely given the ongoing lively debate as to whether the addition of capnography to patient monitoring during PSA adds value.<sup>17</sup> Without doubt, potential technical and financial burdens have further limited adoption of capnography monitoring in various clinical settings.<sup>15,17</sup> Nevertheless, it is important to recognize that patient safety benefits may offset a number of these concerns if the outcomes are applicable to current medical practice.<sup>24</sup> In this regard, the 11 trials identified in the present analysis were all relatively recent, with the first published study identified in 2006. The data used in the meta-analysis therefore represents modern medical practice, and provides consistent evidence of improvements in patient safety with the use of capnography monitoring.

These findings further substantiate a previously published meta-analysis (Waugh *et al.*), which found that capnography monitoring was more likely to detect adverse events, but was faulted for large endpoint heterogeneity.<sup>16</sup> In the present meta-analysis, we focused on identifying high-quality studies,

1  
2  
3 and on maintaining consistent definitions across all included studies, thereby minimizing potential for  
4 heterogeneity. The results show that the addition of capnography to patient monitoring during PSA  
5 results in increased patient safety, with significant reductions in apnea, as well as mild and severe  
6 levels of oxygen desaturation.  
7  
8  
9

10  
11 More recently, a meta-analysis by Conway *et al.* reported a significant benefit with capnography  
12 during colonoscopy only with respect to hypoxemia. However, the study identified and screened only  
13 a fraction of the literature included in the present analysis (388 papers in Conway *et al.*, compared with  
14 861 papers in the current study) and retrieved fewer randomized controlled trials (6 versus 11). In  
15 addition, Conway *et al.* excluded two trials in which an independent observer monitored capnography  
16 output for all patients, and signaled to the attending physician when respiratory compromise was  
17 identified with capnography either immediately (intervention) or after a specified delay (control).<sup>5,6</sup> The  
18 rationale for this was to prevent unnecessary patient harm while avoiding investigator bias. Based on  
19 our understanding, the two trials that Conway and colleagues excluded are, contrary to expectation,  
20 the only studies in the literature that could be considered fully blinded. Among the other studies, the  
21 attending physician would have been aware of study arm assignment.<sup>32,38,42</sup> The results of the Conway  
22 analysis should therefore be interpreted with caution. Nevertheless, the finding of consistent  
23 outcomes for hypoxemia in Conway *et al.* (relative risk 0.59, 95% CI 0.48 to 0.73) and mild desaturation  
24 in the present analysis (OR 0.54, 95% CI 0.44 to 0.66; RR 0.65, 95% CI 0.57 to 0.74) was encouraging.  
25 These findings are also aligned with a European randomized, controlled trial of capnography that was  
26 published after the analysis was complete.<sup>25</sup>  
27  
28  
29  
30  
31  
32  
33  
34  
35  
36  
37  
38  
39  
40  
41  
42  
43  
44  
45  
46

47 Yet another ongoing debate in PSA concerns the clinical importance of seemingly minor endpoints,  
48 such as mild desaturation (oxygenation <90% for 15 seconds). Although such endpoints may be  
49 transient and perhaps clinically insignificant, several recent studies have suggested that mild  
50 desaturation, as a common intraoperative event, may have an impact on post-surgical outcomes.<sup>26</sup>  
51 For example, one retrospective study determined that patients who experienced perioperative  
52 hypoxemia/desaturation had a significant increase in their length of hospital stay (+2.0 days,  
53  
54  
55  
56  
57  
58  
59  
60

1  
2  
3  $p < 0.0001$ ).<sup>27</sup> The long-term importance of these endpoints in terms of patient outcomes and quality  
4 of life remains unknown.  
5  
6

7  
8 Over all of the studies included in the analysis, there were no reports of patient mortality. Only the  
9 largest trials reported any requirement for assisted/bag-mask ventilation, which is used as an  
10 intervention and thereby a proxy measure for potentially life-threatening events. Although it is  
11 generally accepted that much larger studies would be useful to assess whether or not capnography  
12 monitoring impacts patient major morbidity and mortality, there has been no determination of the  
13 trial size that would be required. Power calculations suggest such a large randomized controlled trial is  
14 likely to be impractical.  
15  
16  
17  
18  
19  
20  
21

22  
23 For healthcare providers, the most significant finding may be the consistency of data surrounding  
24 apnea and severe oxygen desaturation, as well as reduced need for assisted ventilation with  
25 capnography. Two closed claim reviews both found that inadequate oxygenation/ventilation was the  
26 most frequent event leading to a claim related to PSA outside the operating room.<sup>28,29</sup> The potential  
27 cost burden is demonstrated by the median cost of a claim settled being USD 330,000 (in 2007 USD).<sup>28</sup>  
28 The authors reported that better monitoring would have reduced the number of claims.<sup>28</sup> A similar  
29 message was returned following the fourth National Audit Project in the UK, which analyzed major  
30 complications of airway management in the National Health Service and determined that  
31 capnography monitoring could have led to earlier identification of airway obstruction, potentially  
32 preventing 74% of death or neurological injury cases.<sup>30,31</sup> Studies included in the present meta-analysis  
33 reported that disordered ventilation as detected by capnography preceded desaturation events by 30  
34 to 60 seconds.<sup>32</sup>  
35  
36  
37  
38  
39  
40  
41  
42  
43  
44  
45  
46  
47  
48

49 The meta-analysis did find an increase in bradycardia with capnography monitoring that was non-  
50 significant, but consistent among the three included studies reporting the endpoint. However, in each  
51 of the three trials, patients in the capnography arm had larger doses and increased use of multiple  
52 agents for inducing PSA. Such confounding is plausible, and may not be unusual. In a non-blinded  
53 study published after the present analysis, the authors identified increased incidence of hypotension  
54  
55  
56  
57  
58  
59  
60

1  
2  
3 in the capnography arm, in addition to higher sedative doses, patient ASA class, and incidence of  
4 comorbidities.<sup>33</sup> All other findings of the current analysis were in line with expectations around the  
5 potential benefits of capnography. Earlier identification of respiratory compromise appears to result in  
6 more timely intervention and prevention of its escalation into patient harm.  
7  
8  
9  
10

11 As with all data synthesis projects, the present study is only as accurate and reliable as the data  
12 underlying it. In the literature, there are examples of newly-published clinical trials that do not align  
13 with the results of published meta-analyses, and meta-analysis results changing on the publication of  
14 new data.<sup>34,35</sup> The systematic nature of study identification and inclusion criteria in the present analysis  
15 was designed to identify all available literature and provide the most robust estimates of intervention  
16 effect. However, the included studies came from a variety of hospital settings, in which the rate of  
17 patient safety events might vary. Analyses for particular settings were undertaken, but were then  
18 limited by reduced data availability. In total, this analysis represented 4,083 patients (control 2,053 and  
19 Capnography 2,030) over 11 studies. Between trials, the number of patients enrolled varied between  
20 132 and 757. Notably, only the four studies including >500 patients identified rare outcomes, such as  
21 differences in use of assisted ventilation.  
22  
23  
24  
25  
26  
27  
28  
29  
30  
31  
32  
33  
34  
35

## 36 **CONCLUSIONS**

37  
38  
39 The results of this comprehensive meta-analysis of high-quality clinical trials provide clear and  
40 consistent evidence of decreased respiratory compromise when capnography monitoring is used  
41 during procedural sedation and analgesia (PSA). Specifically, the analysis identified a statistically  
42 significant and clinically meaningful reduction in apnea, as well as in mild and severe oxygen  
43 desaturation. Large, well designed, randomized controlled trials to provide direct links between use of  
44 capnography and reduction in patient harm may not be feasible. In turn, calls for this type of primary  
45 evidence may delay adoption of capnography monitoring during PSA as a valuable tool for early  
46 intervention and improved patient safety.  
47  
48  
49  
50  
51  
52  
53  
54  
55  
56  
57  
58  
59  
60

1  
2  
3 **Word Count** 3,572  
4  
5  
6  
7

8  
9 **AUTHOR CONTRIBUTIONS**

10  
11 MM formulated the research question; RFP and RS devised the search strategy and data extraction  
12 protocol, which was critically reviewed and revised by MM, JRL and MMRFS; RFP and RS then  
13 conducted the literature searches, screening, data extraction, and meta-analysis, and co-wrote the  
14 manuscript; MM, JRL and MMRFS critically reviewed the manuscript and made substantive revisions  
15 prior to submission.  
16  
17  
18  
19  
20  
21

22  
23 **DATA SHARING STATEMENT**

24  
25 All data used to derive the outcomes presented in the study are documented in the manuscript and  
26 supplementary materials. No additional data are therefore available.  
27  
28  
29

30  
31 **PUBLICATION RIGHTS**

32  
33 The Corresponding Author has the right to grant on behalf of all authors and does grant on behalf of  
34 all authors, an exclusive licence (or non-exclusive for government employees) on a worldwide basis to  
35 the BMJ Publishing Group Ltd to permit this article (if accepted) to be published in BMJ editions and  
36 any other BMJPGJ products and sublicences such use and exploit all subsidiary rights, as set out in our  
37 licence.  
38  
39  
40  
41  
42  
43  
44  
45

46  
47 **TRANSPARENCY DECLARATION**

48  
49 The lead author (the manuscript's guarantor) affirms that the manuscript is an honest, accurate, and  
50 transparent account of the study being reported. No important aspects of the study have been  
51 omitted and any discrepancies from the study as planned (and, if relevant, registered) have been  
52 explained.  
53  
54  
55  
56  
57  
58  
59  
60



## ETHICAL APPROVAL

No ethical approval was required for the study as all data were derived from published data; neither animal nor human subjects were enrolled as part of the present study.

## FUNDING AND STUDY SPONSOR ROLE

This study was funded by Medtronic plc following a research proposal submitted by Ossian Health Economics and Communications GmbH. The sponsor reviewed the final manuscript prior to submission, but submission was not contingent on a particular outcome of the analysis.

## FINANCIAL AND COMPETING INTEREST DISCLOSURE

All authors have completed the Unified Competing Interest forms at [www.icmje.org/coi\\_disclosure.pdf](http://www.icmje.org/coi_disclosure.pdf) (available on request from the corresponding author) and declare:

- Michael Mestek is a full-time employee of Medtronic plc.
- Richard Pollock is a full-time employee of Ossian Health Economics and Communications GmbH, which received research and consultancy fees from Medtronic plc. to conduct the literature review and meta-analysis and prepare the manuscript.
- Rhodri Saunders was a full-time employee of Ossian Health Economics and Communications GmbH at the time of performing the meta-analysis and is currently a director of Coreva Scientific GmbH & Co. KG.
- Michel MRF Struys's research group/department received grants and funding from The Medicines Company (USA), Masimo (USA), Fresenius (Germany), Acacia Design (The Netherlands), Medtronic (USA) and honoraria from The Medicines Company (USA), Masimo (USA), Fresenius (Germany), Baxter (USA), Medtronic (USA), Demed Medical (Belgium).
- Jenifer R. Lightdale has served as a consultant for Medtronic and Norgine, and has received speaker honorarium from Mead-Johnson and Perrigo.

## TABLES AND FIGURES

**Table 1** Included studies reporting endpoints of interest

| Study (reference)                 | Country     | Trial dates    | Modified Jadad | Potential for bias | Hospital setting               | Depth of sedation | Sedative            | N (control, Cap) |
|-----------------------------------|-------------|----------------|----------------|--------------------|--------------------------------|-------------------|---------------------|------------------|
| Beitz 2012 <sup>36</sup>          | Germany     | Feb-10, Jan-11 | 5.5            | High: 3            | Colonoscopy                    | "adequate"        | Propofol            | 757 (374, 383)   |
| Deitch 2010 <sup>37</sup>         | US          | Nov-06, Feb-08 | 5.5            | Low: 0             | Emergency department           | Moderate          | Propofol            | 132 (64, 68)     |
| Friedrich-Rust 2014 <sup>38</sup> | Germany     | Jun-12, May-13 | 6              | Low: 0             | Colonoscopy                    | Deep              | Propofol+           | 533 (266, 267)   |
| Kochhar 2015 <sup>39</sup>        | US          | NA             | 3.5            | Low: 0             | EGD                            | Moderate          | Opioid and BZP      | 210 (108, 102)   |
| Langhan 2015 <sup>40</sup>        | US          | Sep-11, Jan-13 | 6              | Low: 0             | Pediatric emergency department | NA                | Ketamine, midazolam | 154 (77, 77)     |
| Lightdale 2006 <sup>6</sup>       | US          | Dec-03, Nov-04 | 8              | Low: 0             | Endoscopy                      | Moderate          | Fentanyl, midazolam | 163 (80, 83)     |
| Mehta 2014 <sup>41</sup>          | US          | NA             | 3.5            | Low: 0             | Colonoscopy                    | Moderate          | Opioid and BZP      | 232 (115, 117)   |
| Qadeer 2009 <sup>5</sup>          | US          | Jan-07, May-08 | 7.5            | Moderate: 1        | ERCP and EUS                   | NA                | Midazolam+          | 247 (124, 123)   |
| Slagelse 2013 <sup>42</sup>       | Denmark     | Sep-10, Jan-11 | 6              | No: 0              | Endoscopy                      | NA                | Propofol            | 540 (277, 263)   |
| van Loon 2014 <sup>32</sup>       | Netherlands | Apr-10, Jan-11 | 5              | No: 0              | Gynecology                     | Deep              | Propofol            | 415 (209, 206)   |
| Zongming 2014 <sup>43</sup>       | China       | Nov-10, May-13 | 6              | No: 0              | Abortion                       | Deep              | Propofol            | 700 (359, 341)   |

+, in combination with multiple other agents; BZP, benzodiazepine; Cap, Capnography (arm); EGD, Esophagogastroduodenoscopy; ERCP, Endoscopic retrograde cholangiopancreatography; EUS, Endoscopic ultrasonography

**Figure 1 Mild and severe desaturation are reduced with capnography monitoring**

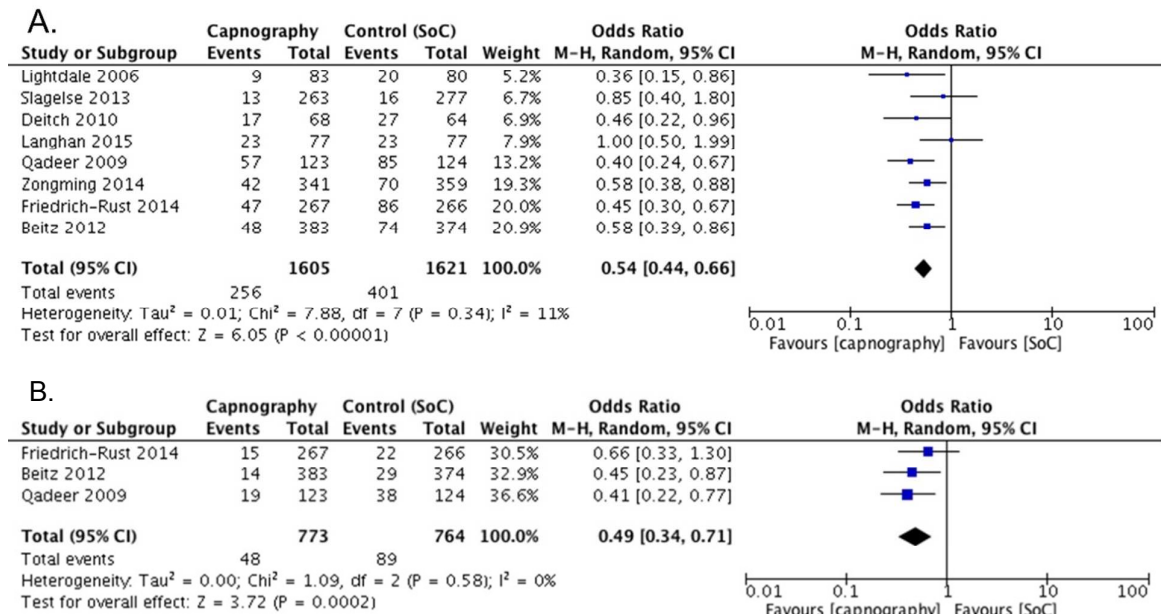

The odds ratios for the mild desaturation endpoint are presented for high-quality studies (primary analysis) for mild desaturation (A) and severe desaturation (B). CI, Confidence interval; M-H, Mantel-Haenszel

**Figure 2 Need for assisted ventilation is consistently reduced with capnography monitoring**

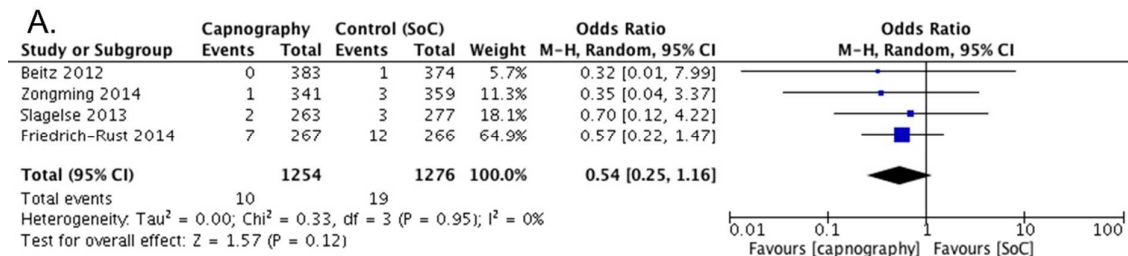

The odds ratios for the assisted ventilation endpoint are presented for high quality studies (primary analysis, A), which were also all the studies with data. CI, Confidence interval; M-H, Mantel-Haenszel

**Table 2** Sensitivity analyses around the primary analyses, treatment effect is the odds ratio [95% confidence interval]

| Scenario                                | Desaturation, mild       | Desaturation, severe     | Apnea                    | Bradycardia              | Hypotension              | Assisted ventilation     | Supplemental oxygen      |
|-----------------------------------------|--------------------------|--------------------------|--------------------------|--------------------------|--------------------------|--------------------------|--------------------------|
| <b>Base case (high quality studies)</b> | <b>0.54 [0.44, 0.66]</b> | <b>0.49 [0.34, 0.71]</b> | <b>0.49 [0.32, 0.75]</b> | <b>1.23 [0.87, 1.74]</b> | <b>1.03 [0.74, 1.43]</b> | <b>0.54 [0.25, 1.16]</b> | <b>0.83 [0.59, 1.17]</b> |
| All studies with data                   | 0.65 [0.51, 0.81]        | 0.47 [0.34, 0.66]        | 0.75 [0.43, 1.33]        | 1.23 [0.87, 1.74]        | 1.03 [0.74, 1.43]        | 0.54 [0.25, 1.16]        | 0.93 [0.65, 1.33]        |
| Moderate sedation                       | 0.67 [0.44, 1.04]        | –                        | 0.92 [0.52, 1.64]        | –                        | –                        | –                        | –                        |
| US only                                 | 0.64 [0.44, 0.93]        | 0.35 [0.21, 0.59]        | 0.75 [0.43, 1.33]        | –                        | –                        | –                        | 0.82 [0.27, 2.54]        |
| Europe only                             | 0.65 [0.52, 0.81]        | 0.61 [0.40, 0.93]        | –                        | 1.46 [0.70, 3.03]        | 0.95 [0.64, 1.40]        | 0.57 [0.25, 1.29]        | 0.91 [0.63, 1.30]        |
| Studies with potential bias excluded    | 0.69 [0.58, 0.82]        | 0.51 [0.28, 0.90]        | 0.92 [0.52, 1.64]        | 1.46 [0.69, 3.08]        | 0.95 [0.64, 1.41]        | 0.56 [0.25, 1.23]        | 1.12 [0.81, 1.55]        |
| Studies in pediatrics excluded          | 0.64 [0.54, 0.75]        | 0.47 [0.34, 0.66]        | 0.79 [0.38, 1.65]        | 1.23 [0.87, 1.74]        | 1.03 [0.74, 1.43]        | 0.54 [0.25, 1.16]        | 0.90 [0.63, 1.31]        |
| Gender-specific studies excluded        | 0.60 [0.50, 0.72]        | 0.45 [0.31, 0.63]        | 0.75 [0.43, 1.33]        | 1.23 [0.87, 1.74]        | 1.02 [0.71, 1.48]        | 0.57 [0.25, 1.29]        | 0.83 [0.59, 1.17]        |
| Studies with mean age >30 years         | 0.59 [0.49, 0.70]        | 0.49 [0.33, 0.74]        | 0.79 [0.38, 1.65]        | 1.23 [0.87, 1.74]        | 1.03 [0.74, 1.43]        | 0.54 [0.25, 1.16]        | 0.80 [0.57, 1.14]        |

CI, confidence interval; OR, odds ratio; US, United States

## SUPPLEMENT

### **METHODS: Literature screening and data extraction**

All returned articles were consolidated in a database (Sourcerer, Covalence Research Ltd, London UK), and duplicate studies were removed. Title and abstract screening using criteria detailed in (Supplement, Table 4) was performed independently by RS and RFP. Full-text versions of all non-excluded articles were retrieved by MM and reviewed independently by RS and RFP using the inclusion criteria in Table 4 (Supplement). Data were extracted from all articles included after abstract and full-text review. Extracted data included the number of patients with events and the population at risk, in addition to items required to assess article quality and bias. This was performed independently by RS and RFP and checked by ME and MMS. All extracted endpoint data were reviewed by JL and MMS for clinical utility. The aim was to ensure that all synthesized data relate to clinically equivalent endpoints

### **RESULTS: Hypotension**

Four studies reported the outcome and all were classified as being of high-quality. The incidence of hypotension was equivalent between capnography and control arms in all studies except the one that lacked a definition for the endpoint. Between study heterogeneity was low ( $I^2 = 0\%$ ) and the estimated OR tended to one (OR 1.03, 95% CI 0.71–1.43; Supplement, Figure 7). There is no evidence of capnography monitoring influencing the incidence of this sedation-related adverse event.

### **RESULTS: Supplemental oxygen**

Although not a target endpoint in the protocol, six studies reported the requirement for oxygen supplementation. Of these, five studies were classified as high-quality and the primary analysis returned evidence of heterogeneity ( $I^2 = 41$ ) and an OR of 0.83 (95% CI 0.59–1.17; Supplement, Figure 7). When analyzing all available data, the OR was 0.93 (95% CI 0.65–1.33).

1  
2  
3  
4  
5  
6  
7  
8  
9  
10  
11  
12  
13  
14  
15  
16  
17  
18  
19  
20  
21  
22  
23  
24  
25  
26  
27  
28  
29  
30  
31  
32  
33  
34  
35  
36  
37  
38  
39  
40  
41  
42  
43  
44  
45  
46  
47  
48  
49  
50  
51  
52  
53  
54  
55  
56  
57  
58  
59  
60

**Figure 3**      **The respiratory compromise cascade**

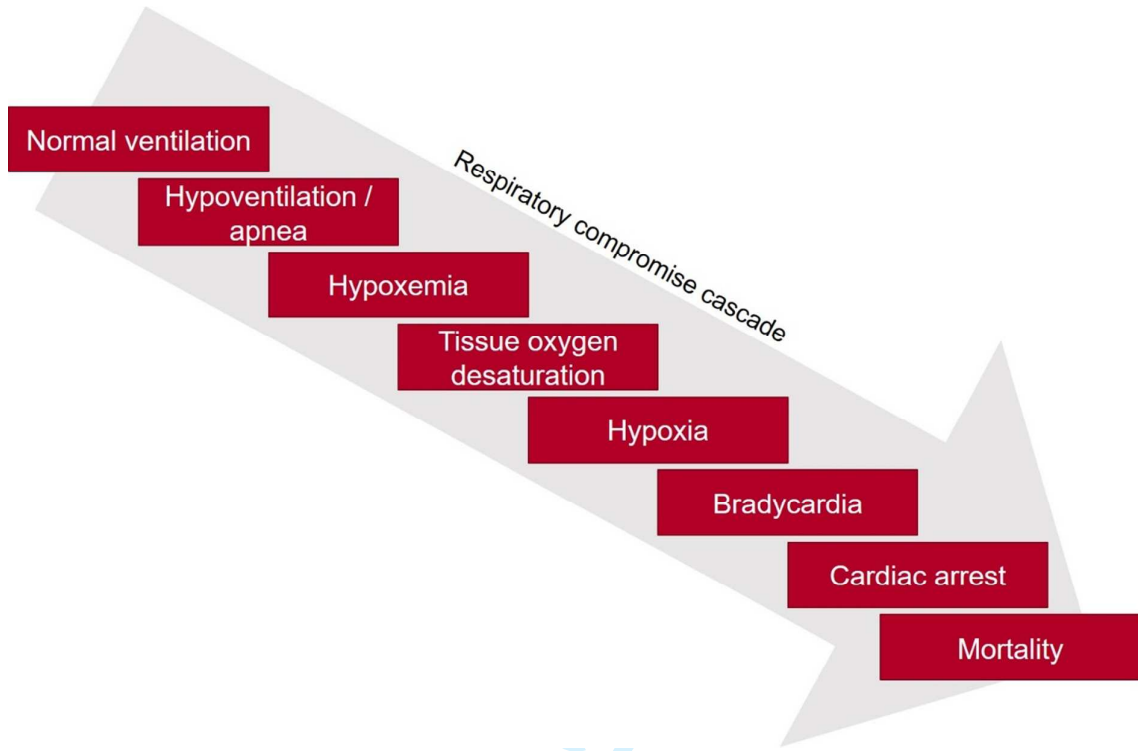

view only

**Table 3** The literature search strategy employed for PubMed was used as a basis for searching other literature databases

| Search | Search string                                                                                                                                                                                                                                                                                                                                                 | Results returned in PubMed |
|--------|---------------------------------------------------------------------------------------------------------------------------------------------------------------------------------------------------------------------------------------------------------------------------------------------------------------------------------------------------------------|----------------------------|
| #1     | Capnogra*[tiab] OR ETCO2[tiab] OR (("end-tidal"[tiab] OR monitor*[tiab]) AND ("carbon dioxide"[tiab] or CO2[tiab])) OR sidestream[tiab] OR mainstream[tiab] OR microstream[tiab] OR "Capnography"[Mesh] OR (("Monitoring, Physiologic"[Mesh] OR "Monitoring, Intraoperative"[Mesh] OR "Intraoperative Care"[Mesh]) AND ("carbon dioxide"[tiab] or CO2[tiab])) | 20,192                     |
| #2     | "Conscious Sedation"[Mesh] OR "Deep Sedation"[Mesh] OR "procedural sedation"[tiab] OR "moderate sedation"[tiab] or "conscious sedation"[tiab] or "deep sedation"[tiab] or sedati*[tiab] or anesthes*[tiab]                                                                                                                                                    | 175,021                    |
| #3     | "Randomized Controlled Trials as Topic"[Mesh] OR "Randomized Controlled Trial"[Publication Type] OR RCT[tiab] OR ((random*[tiab] OR clinic*[tiab]) AND control*[tiab] AND (trial[tiab] OR study[tiab]))                                                                                                                                                       | 770,467                    |
| #4     | #1 AND #2 AND #3                                                                                                                                                                                                                                                                                                                                              | 410                        |
| #5     | #4 AND "1995/01/01"[PDAT] : "2015/12/31"[PDAT]                                                                                                                                                                                                                                                                                                                | 348                        |

**Table 4** Study exclusion and inclusion criteria

| Exclusion criteria                                          | Inclusion criteria                                                                                                            |
|-------------------------------------------------------------|-------------------------------------------------------------------------------------------------------------------------------|
| Research not in humans [106, 111]                           | Presents data for sedation (procedural, moderate, or deep) during ambulatory surgery                                          |
| Not a randomized, controlled trial [172, 163]               | Reports at least one of the following outcomes (apnea, aspiration, bradycardia, desaturation/hypoxia, hypotension, mortality) |
| Does not include capnography as the intervention [559, 566] | Uses time capnography (as opposed to volumetric)                                                                              |
| Includes fewer than 40 patients in either arm [5, 2]        | Is specific to the hospital setting                                                                                           |

Numbers in brackets provide the number of articles assigned that reason for exclusion by each of the two independent reviewers (RS, RFP)

Figure 4 Literature review flow diagram

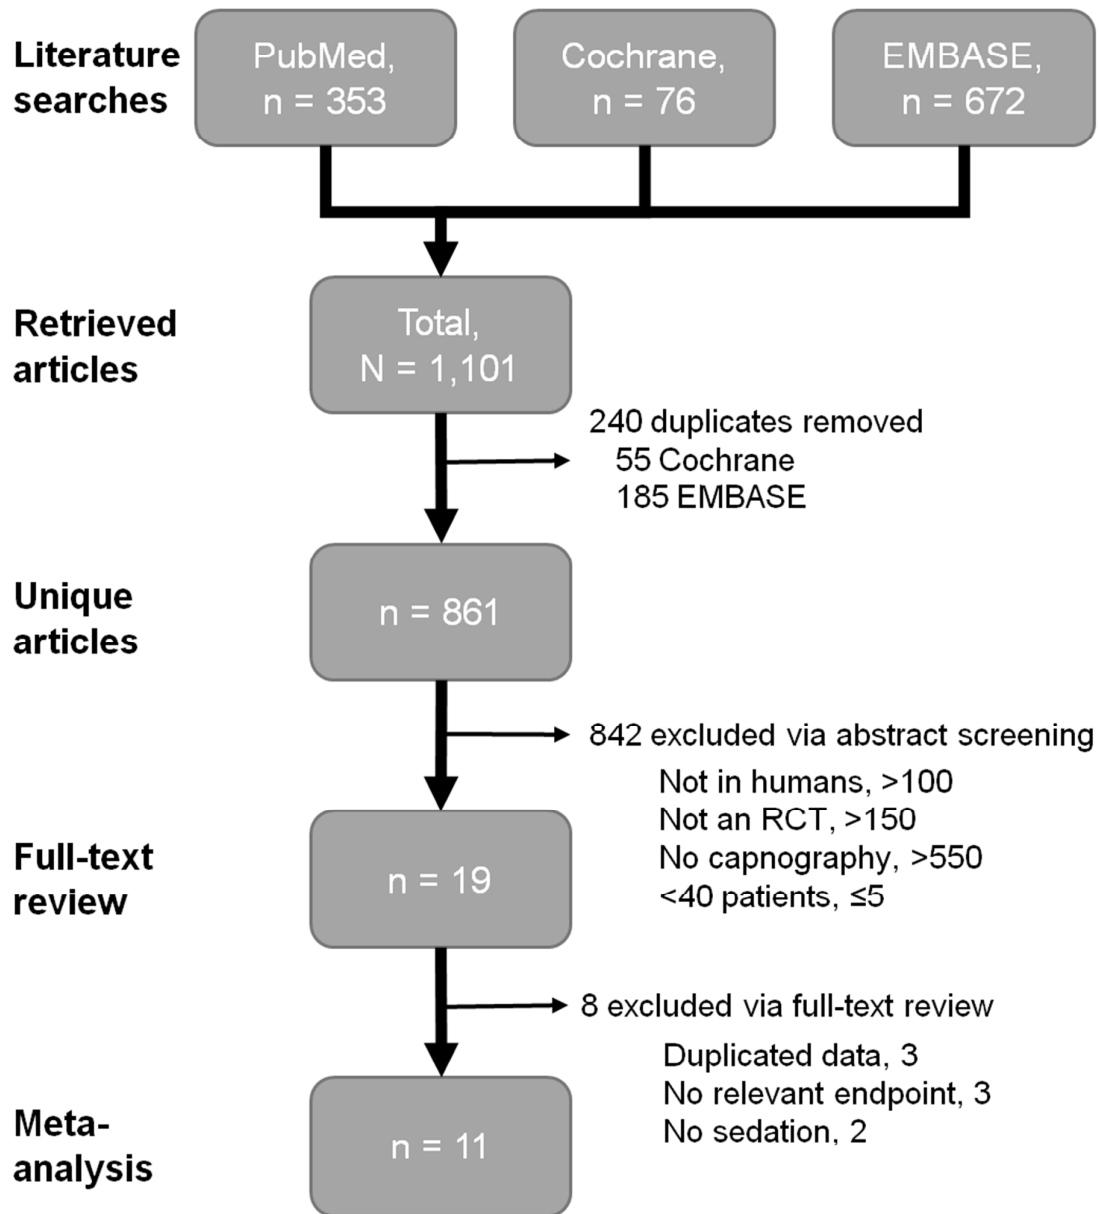

Full details of exclusion criteria provided by both independent reviewers during abstract screening are given in Table 2.



**Table 5** Endpoint definitions within included studies

| Study               | Desaturation, mild, SpO <sub>2</sub> % | Desaturation, severe, SpO <sub>2</sub> % | Apnea                        | Bradycardia, HR beats/minute | Hypotension, SBP mm Hg | Supplemental oxygen |
|---------------------|----------------------------------------|------------------------------------------|------------------------------|------------------------------|------------------------|---------------------|
| Beitz 2012          | <90                                    | ≤85                                      |                              | <50                          | <90                    | >2 L/min            |
| Deitch 2010         | <93 for ≥15 seconds                    |                                          |                              |                              |                        |                     |
| Friedrich-Rust 2014 | <90 for ≥15 seconds                    | <85                                      |                              | <50                          | <100                   | >2 L/min            |
| Kochhar 2015        | <90 for ≥10 seconds                    | ≤85                                      | No capnogram for ≥5 seconds  |                              |                        |                     |
| Langhan 2015        | <95                                    |                                          |                              |                              |                        |                     |
| Lightdale 2006      | <95                                    |                                          |                              |                              |                        |                     |
| Mehta 2014          | <90 for ≥10 seconds                    | <85                                      |                              |                              |                        |                     |
| Qadeer 2009         | <90 for ≥15 seconds                    | ≤85                                      | No capnogram for ≥15 seconds |                              | Not defined            | Any use             |
| Slagelse 2013       | <92                                    |                                          |                              |                              |                        | Any increase        |
| van Loon 2014       | <91                                    | <81                                      |                              |                              |                        | Any increase        |
| Zongming 2014       | <90                                    | ≤85                                      |                              | <50                          | <90                    | >3 L/min            |

HR, Heart rate; SBP, Systolic blood pressure; SpO<sub>2</sub>, Oxygen saturation

Figure 5 Mild desaturation is reduced with capnography monitoring

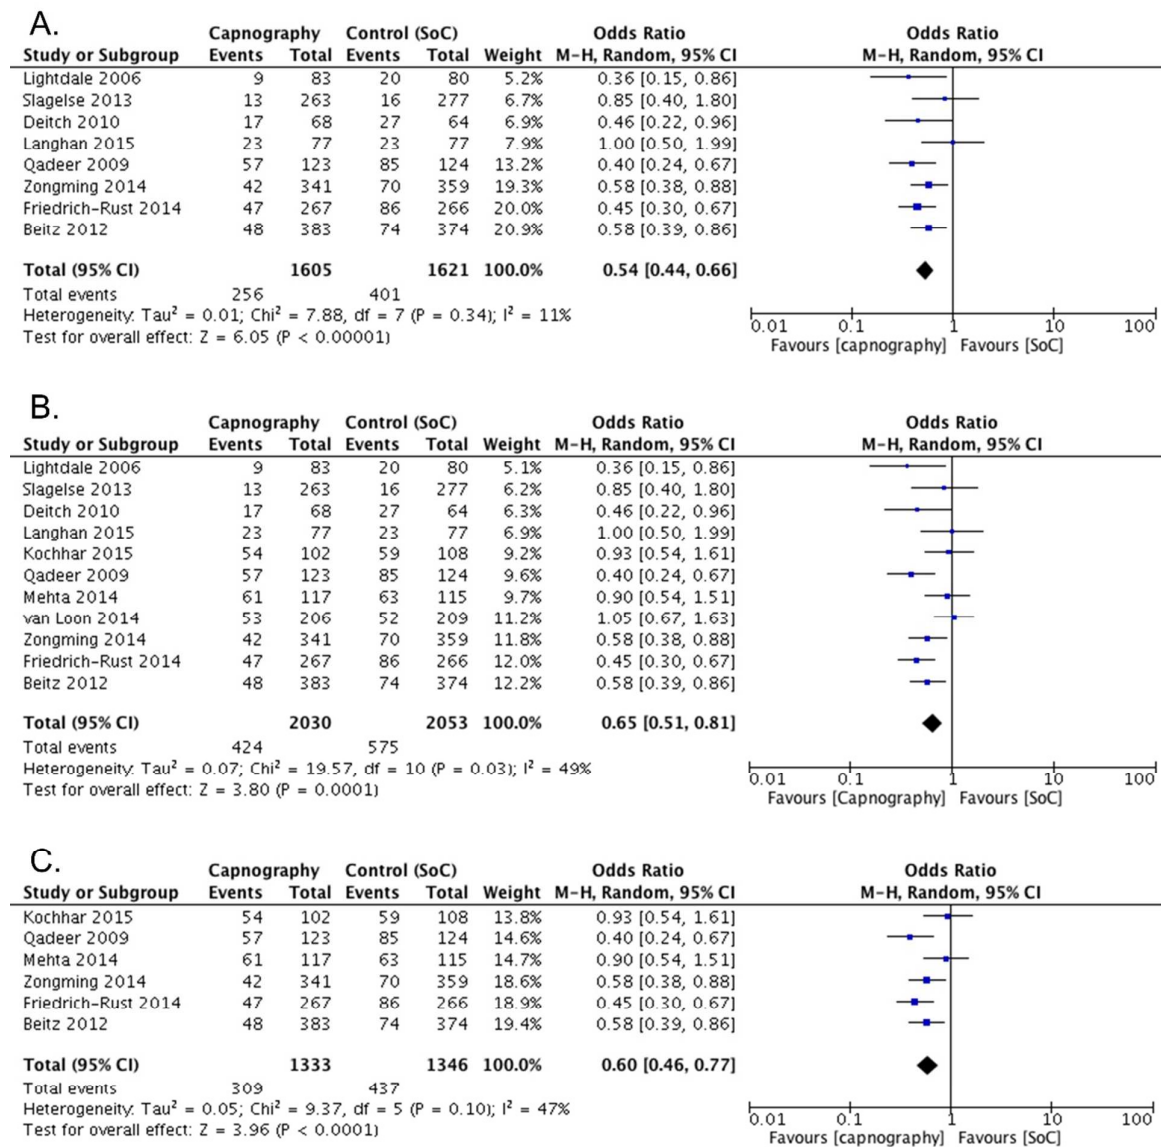

The odds ratios for the mild desaturation endpoint are presented for high-quality studies (primary analysis, A), all studies with data (B) and studies with an endpoint defined as oxygen saturation <90% (C). CI, Confidence interval;

M-H, Mantel-Haenszel

**Figure 6 Severe desaturation is reduced with capnography monitoring**

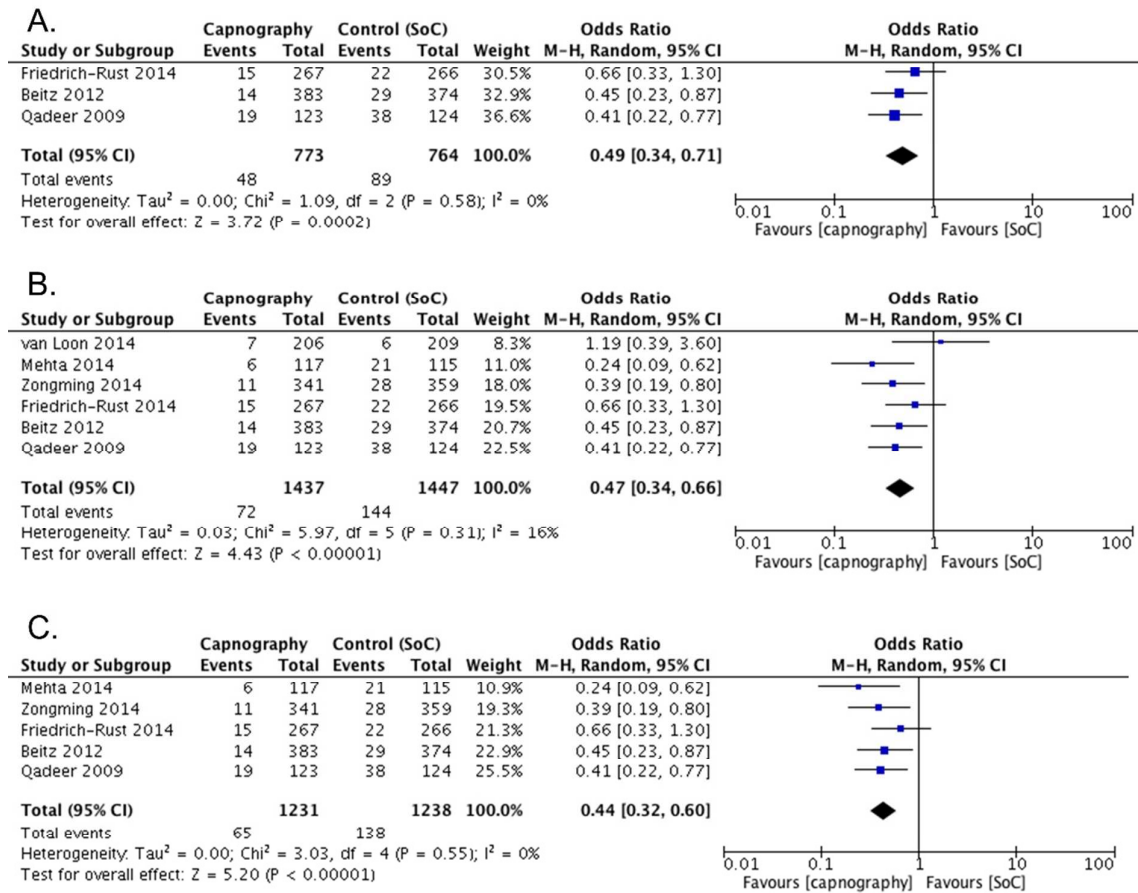

The odds ratios for the severe desaturation endpoint are presented for high quality studies (primary analysis, A), all studies with data (B) and studies with an endpoint defined as oxygen saturation <85% (C). CI, Confidence interval; M-H, Mantel-Haenszel

**Figure 7 Evidence of reduced apnea incidence with capnography monitoring and a potential trend towards reduced need for supplemental oxygen**

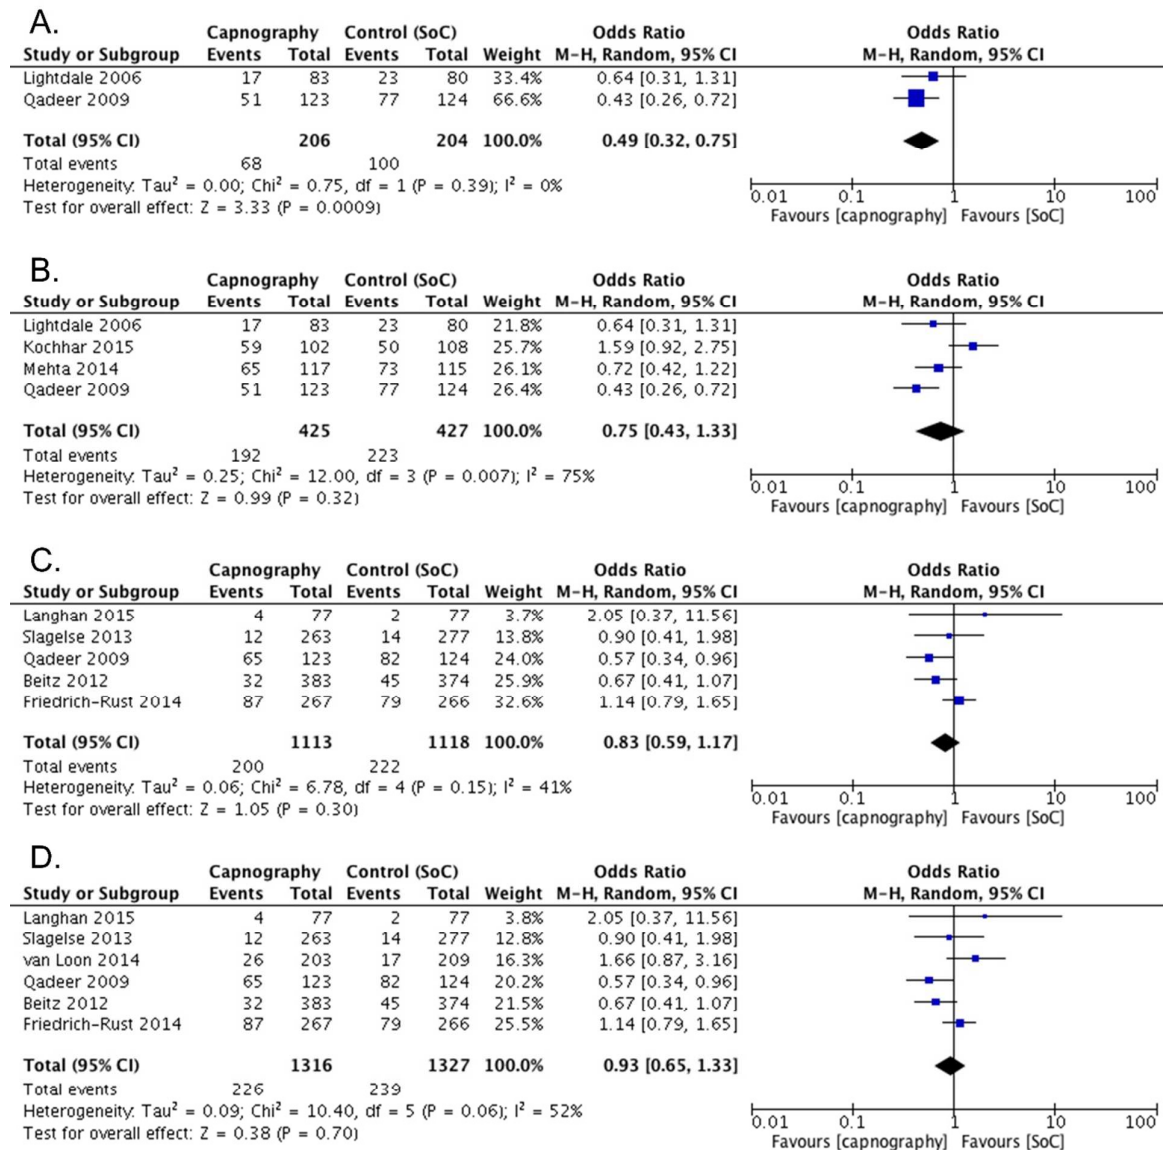

The odds ratios for the apnea endpoint are presented for high quality studies (primary analysis, A) and all studies with data (B). Odds ratios for the use of supplemental oxygen are presented for high quality studies (primary analysis, C) and all studies with data (D). CI, Confidence interval; M-H, Mantel-Haenszel

**Figure 8** Bradycardia tends to be increased with capnography monitoring, but there is little impact on the incidence of hypotension

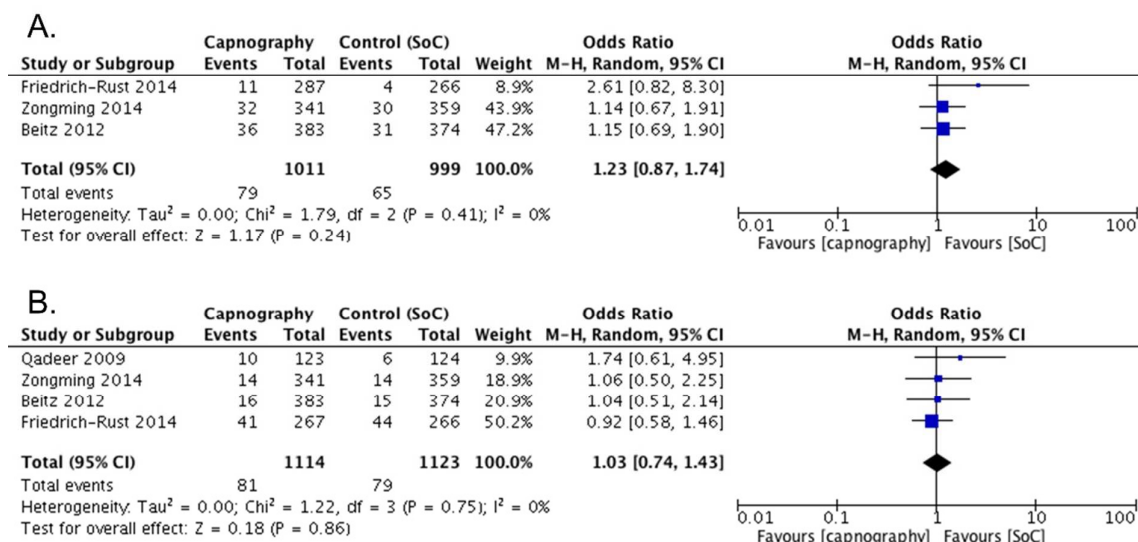

The odds ratios for the bradycardia (A) and hypotension (B) endpoints are presented for high quality studies (primary analysis), which were also all the studies with data. CI, Confidence interval; M-H, Mantel-Haenszel

## REFERENCES

- <sup>1</sup> Sharma VK, Nguyen CC, Crowell MD, Lieberman DA, de Garmo P, Fleischer DE. A national study of cardiopulmonary unplanned events after GI endoscopy. *Gastrointest Endosc.* 2007;66:27–34.
- <sup>2</sup> Gangi S, Saidi F, Patel K, Johnstone B, Jaeger J, Shine D. Cardiovascular complications after GI endoscopy: occurrence and risks in a large hospital system. *Gastrointest Endosc.* 2004;60:679–85.
- <sup>3</sup> Erden IA, Pamuk AG, Akinci SB, Koseoglu A, Aypar U. Comparison of two ketamine-propofol dosing regimens for sedation during interventional radiology procedures. *Minerva anesthesiologica* 2010;76:260–5.
- <sup>4</sup> Lichtenstein DR, Jagannath S, Baron TH, *et al.* Sedation and anesthesia in GI endoscopy. *Gastrointest Endosc.* 2008;68:205–16.
- <sup>5</sup> Qadeer MA, Vargo JJ, Dumot JA, *et al.* Capnographic monitoring of respiratory activity improves safety of sedation for endoscopic cholangiopancreatography and ultrasonography. *Gastroenterology.* 2009;136:1568–76.
- <sup>6</sup> Lightdale JR, Goldmann DA, Feldman HA, Newburg AR, DiNardo JA, Fox VL. Microstream capnography improves patient monitoring during moderate sedation: a randomized, controlled trial. *Pediatrics.* 2006;117:e1170–8.
- <sup>7</sup> Cotton PB, Eisen GM, Aabakken L, *et al.* A lexicon for endoscopic adverse events: report of an ASGE workshop. *Gastrointest Endosc.* 2010;71:446–54.
- <sup>8</sup> Vargo JJ, Cohen LB, Rex DK, Kwo PY. Position statement: nonanesthesiologist administration of propofol for GI endoscopy. *Gastrointest Endosc.* 2009;70:1053–9.
- <sup>9</sup> Qadeer MA, Rocio Lopez A, Dumot JA, Vargo JJ. Risk Factors for Hypoxemia During Ambulatory Gastrointestinal Endoscopy in ASA I-II Patients. *Dig Dis Sci.* 2009;54(5):1035–40.

- 1  
2  
3  
4 <sup>10</sup> Radaelli F, Terruzzi V, Minoli G. Extended/advanced monitoring techniques in gastrointestinal  
5  
6 endoscopy. *Gastrointest Endosc Clin N Am*. 2004;14:335–52.  
7  
8  
9 <sup>11</sup> Kober A, Schubert B, Bertalanffy P, et al. Capnography in non-tracheally intubated emergency  
10  
11 patients as an additional tool in pulse oximetry for prehospital monitoring of respiration. *Anesth*  
12  
13 *Analg*. 2004;98:206–10.  
14  
15 <sup>12</sup> Soto RG, Fu ES, Vila H, Jr., Miguel RV. Capnography accurately detects apnea during monitored  
16  
17 anesthesia care. *Anesth Analg*. 2004;99:379–82.  
18  
19  
20 <sup>13</sup> Thomas PE. What's the latest on carbon dioxide monitoring? *Neonatal Netw*. 2004;23:70–2.  
21  
22  
23 <sup>14</sup> Yildzdas D, Yapcoglu H, Ylmaz HL. The value of capnography during sedation or sedation/analgesia  
24  
25 in pediatric minor procedures. *Pediatr Emerg Care*. 2004;20:162–5.  
26  
27  
28 <sup>15</sup> American Society for Gastrointestinal Endoscopy, American College of Gastroenterology,  
29  
30 Association TAG. Universal adoption of capnography for moderate sedation in adults undergoing  
31  
32 upper endoscopy and colonoscopy has not been shown to improve patient safety or clinical outcomes  
33  
34 and significantly increases costs for moderate sedation. Available from:  
35  
36 <http://www.asge.org/assets/0/71542/71544/90dc9b63-593d-48a9-bec1-9f0ab3ce946a.pdf> Last  
37  
38 accessed April 11, 2016.  
39  
40  
41 <sup>16</sup> Waugh JB, Epps CA, Khodneva YA. Capnography enhances surveillance of respiratory events during  
42  
43 procedural sedation: a meta-analysis. *J Clin Anesth*. 2011;23:189–96.  
44  
45  
46 <sup>17</sup> Cook TM. The winds of change - progress in the implementation of universal capnography.  
47  
48 *Anaesthesia*. 2016;71(4):363–8.  
49  
50  
51 <sup>18</sup> Jadad AR, Moore RA, Carroll D, et al. Assessing the quality of reports of randomized clinical trials: is  
52  
53 blinding necessary? *Control Clin Trials*. 1996;17(1):1–12.  
54  
55  
56 <sup>19</sup> Review Manager. The Nordic Cochrane Centre, The Cochrane Collaboration, Copenhagen, Denmark.  
57  
58  
59  
60

- 1  
2  
3  
4<sup>20</sup> DerSimonian R, Laird N. Meta-analysis in clinical trials. *Control Clin Trials*. 1986;7(3):177–88.  
5  
6  
7<sup>21</sup> Mantel N, Haenszel W. Statistical aspects of the analysis of data from retrospective studies of  
8  
9 disease. *Journal of the National Cancer Institute* 1959;22:719–48.  
10  
11<sup>22</sup> Guimaraes ES, Campbell EJ, Richter JM. The Safety of Nurse-Administered Procedural Sedation  
12  
13 Compared to Anesthesia Care in a Historical Cohort of Advanced Endoscopy Patients. *Anesth Analg*.  
14  
15 2014;119(2):349–56.  
16  
17<sup>23</sup> Zhong B. How to Calculate Sample Size in Randomized Controlled Trial? *J Thorac Dis*. 2009;1(1):51–  
18  
19 54.  
20  
21  
22  
23<sup>24</sup> Saunders R, Erslon M, Vargo J. Modeling the costs and benefits of capnography monitoring during  
24  
25 procedural sedation for gastrointestinal endoscopy. *Endosc Int Open*. 2016;4(3):E340–51.  
26  
27  
28<sup>25</sup> Klare Peter, Reiter Johanna, Meining Alexander, et al. Capnographic monitoring of midazolam and  
29  
30 propofol sedation during ERCP: a randomized controlled study (EndoBreath Study). *Endoscopy*.  
31  
32 2016;48:42–50.  
33  
34  
35<sup>26</sup> Ehrenfeld JM, Funk LM, Van Schalkwyk J, Merry AF, Sandberg WS, Gawande A. The incidence of  
36  
37 hypoxemia during surgery: evidence from two institutions. *Can J Anaesth*. 2010;57(10):888–97.  
38  
39  
40<sup>27</sup> Dunham CM, Hileman BM, Hutchinson AE, Chance EA, Huang GS. Perioperative hypoxemia is  
41  
42 common with horizontal positioning during general anesthesia and is associated with major adverse  
43  
44 outcomes: a retrospective study of consecutive patients. *BMC Anesthesiol*. 2014;14:43.  
45  
46  
47<sup>28</sup> Metzner J, Posner KL, Domino KB. The risk and safety of anesthesia at remote locations: the US  
48  
49 closed claims analysis. *Curr Opin Anaesthesiol*. 2009;22(4):502–8.  
50  
51  
52<sup>29</sup> Robbertze R, Posner KL, Domino KB. Closed claims review of anesthesia for procedures outside the  
53  
54 operating room. *Curr Opin Anaesthesiol*. 2006;19(4):436–42.  
55  
56  
57  
58  
59  
60



1  
2  
3  
4 <sup>30</sup> Cook TM, Woodall N, Harper J, Bengner J. Major complications of airway management in the UK:  
5  
6 results of the Fourth National Audit Project of the Royal College of Anaesthetists and the Difficult  
7  
8 Airway Society. Part 2: intensive care and emergency departments. *Br J Anaesth*. 2011;106:632–42.  
9

10  
11 <sup>31</sup> Cook TM, Woodall N, Frerk C; Fourth National Audit Project. Major complications of airway  
12  
13 management in the UK: results of the Fourth National Audit Project of the Royal College of  
14  
15 Anaesthetists and the Difficult Airway Society. Part 1: anaesthesia. *Br J Anaesth*. 2011;106(5):632–42.  
16

17  
18 <sup>32</sup> van Loon K, van Rheineck Leyssius AT, van Zaane B, Denteneer M, Kalkman CJ. Capnography during  
19  
20 deep sedation with propofol by nonanesthesiologists: a randomized controlled trial. *Anesth Analg*.  
21  
22 2014;119:49–55.  
23

24  
25 <sup>33</sup> Campbell SG, Magee KD, Zed PJ, *et al*. End-tidal capnometry during emergency department  
26  
27 procedural sedation and analgesia: a randomized, controlled study. *World J Emerg Med*.  
28  
29 2016;7(1):13–8.  
30

31  
32 <sup>34</sup> LeLorier J, Gregoire G, Benhaddad A, Lapierre J, Derderian F. Discrepancies between meta-analyses  
33  
34 and subsequent large randomized, controlled trials. *N Engl J Med*. 1997;337(8):536–42.  
35

36  
37 <sup>35</sup> Trikalinos TA, Churchill R, Ferri M, *et al*. Effect sizes in cumulative meta-analyses of mental health  
38  
39 randomized trials evolved over time. *J Clin Epidemiol*. 2004;57(11):1124–30.  
40

41  
42 <sup>36</sup> Beitz A, Riphaut A, Meining A, *et al*. Capnographic monitoring reduces the incidence of arterial  
43  
44 oxygen desaturation and hypoxemia during propofol sedation for colonoscopy: a randomized,  
45  
46 controlled study (ColoCap Study). *Am J Gastroenterol*. 2012;107:1205–12.  
47

48  
49 <sup>37</sup> Deitch K, Miner J, Chudnofsky CR, Dominici P, Latta D. Does end tidal CO2 monitoring during  
50  
51 emergency department procedural sedation and analgesia with propofol decrease the incidence of  
52  
53 hypoxic events? A randomized, controlled trial. *Ann Emerg Med*. 2010;55:258–64.  
54

55  
56 <sup>38</sup> Friedrich-Rust M, Welte M, Welte C, *et al*. Capnographic monitoring of propofol-based sedation  
57  
58 during colonoscopy. *Endoscopy*. 2014;46:236–44.  
59  
60

1  
2  
3  
4 <sup>39</sup> Kochhar G, Mehta PP, Kirsh B, Rizk MK, Wang Y, John B, Albeldawi M, Vargo JJ. Tu2057 Does  
5  
6 Capnography Prevent Hypoxemia in ASA 1-2 Outpatients Undergoing Elective EGD Targeting  
7  
8 Moderate Sedation? Results from a Prospective, Randomized, Single Blinded Study.  
9  
10 Gastroenterology;148:S-1196.  
11

12  
13 <sup>40</sup> Langan ML, Shabanova V, Li FY, Bernstein SL, Shapiro ED. A randomized controlled trial of  
14  
15 capnography during sedation in a pediatric emergency setting. Am J Emerg Med. 2015;33:25-30.  
16

17  
18 <sup>41</sup> Mehta P, Kochhar G, Albeldawi M, *et al.* Capnographic Monitoring Does Not Improve Detection of  
19  
20 Hypoxemia in Colonoscopy With Moderate Sedation: A Randomized, Controlled Trial. Am J  
21  
22 Gastroenterol. 2014;109:S588.  
23

24  
25 <sup>42</sup> Slagelse C, Vilmann P, Hornslet P, Jorgensen HL, Horsted TI. The role of capnography in endoscopy  
26  
27 patients undergoing nurse-administered propofol sedation: a randomized study. Scand J  
28  
29 Gastroenterol. 2013;48(10):1222-30.  
30

31  
32 <sup>43</sup> Zongming J, Zhonghua C, Xiangming F. Sidestream capnographic monitoring reduces the incidence  
33  
34 of arterial oxygen desaturation during propofol ambulatory anesthesia for surgical abortion. Med Sci  
35  
36 Monit. 2014;20:2336-42.  
37  
38  
39  
40  
41  
42  
43  
44  
45  
46  
47  
48  
49  
50  
51  
52  
53  
54  
55  
56  
57  
58  
59  
60

# BMJ Open

## PATIENT SAFETY DURING PROCEDURAL SEDATION USING CAPNOGRAPHY MONITORING: A SYSTEMATIC REVIEW AND META-ANALYSIS

|                                    |                                                                                                                                                                                                                                                                                                                                                                   |
|------------------------------------|-------------------------------------------------------------------------------------------------------------------------------------------------------------------------------------------------------------------------------------------------------------------------------------------------------------------------------------------------------------------|
| Journal:                           | <i>BMJ Open</i>                                                                                                                                                                                                                                                                                                                                                   |
| Manuscript ID                      | bmjopen-2016-013402.R1                                                                                                                                                                                                                                                                                                                                            |
| Article Type:                      | Research                                                                                                                                                                                                                                                                                                                                                          |
| Date Submitted by the Author:      | 19-Oct-2016                                                                                                                                                                                                                                                                                                                                                       |
| Complete List of Authors:          | Saunders, Rhodri; Coreva Scientific GmbH & Co. KG.<br>Struys, Michel; University of Groningen, Department of Anesthesiology<br>Pollock, Richard; Ossian Health Economics and Communications GmbH,<br>Mestek, Michael; Medtronic Inc, Patient Monitoring & Recovery<br>Lightdale, Jenifer; UMass Memorial Children's Medical Center, Pediatric<br>Gastroenterology |
| <b>Primary Subject<br>Heading</b>: | Anaesthesia                                                                                                                                                                                                                                                                                                                                                       |
| Secondary Subject Heading:         | Respiratory medicine                                                                                                                                                                                                                                                                                                                                              |
| Keywords:                          | Capnography, Meta-analysis, Procedural sedation, Ambulatory surgery                                                                                                                                                                                                                                                                                               |
|                                    |                                                                                                                                                                                                                                                                                                                                                                   |

SCHOLARONE™  
Manuscripts

**PATIENT SAFETY DURING PROCEDURAL SEDATION USING CAPNOGRAPHY****MONITORING: A SYSTEMATIC REVIEW AND META-ANALYSIS**

**Authors:** Rhodri Saunders DPhil<sup>1,2</sup>, Michel MRF Struys MD PhD FRCA (Hon)<sup>3</sup>,  
Richard F Pollock MA MSci<sup>2</sup>, Michael Mestek PhD<sup>4</sup>, Lightdale JR MD MPH<sup>5</sup>

**Affiliations:** <sup>1</sup> Coreva Scientific GmbH & Co. KG., Freiburg, Germany  
<sup>2</sup> Ossian Health Economics and Communications, Basel, Switzerland  
<sup>3</sup> Department of Anesthesiology, University of Groningen, University  
Medical Center Groningen, Groningen, The Netherlands; Department of  
Anesthesia, Ghent University, Gent, Belgium  
<sup>4</sup> Medtronic, Patient Monitoring & Recovery, Boulder, CO  
<sup>5</sup> Pediatric Gastroenterology, UMass Memorial Children's Medical Center,  
Worcester, MA; University of Massachusetts Medical School, Worcester,  
MA

**Corresponding author:** Richard Pollock MA MSci  
Ossian Health Economics and Communications GmbH,  
Bäumleingasse 20,  
4051 Basel, Switzerland  
+41 61 271 62 14  
pollock@ossianconsulting.com

**Word count:** 5,140

**Running title:** Patient safety during sedation: a meta-analysis

**Key words:** Capnography; Respiratory compromise; Oxygen desaturation; Apnea;  
Assisted ventilation;

**Target journal:** BMJ

**Grant support:** This study was supported by funding from Medtronic plc.

## ABSTRACT

### Objective

To evaluate the effect of capnography monitoring on sedation-related adverse events during procedural sedation and analgesia (PSA) administered during ambulatory surgery relative to visual assessment and pulse oximetry alone.

### Design and Setting

Systematic literature review and random effects meta-analysis of randomized controlled trials (RCTs) reporting sedation-related adverse event incidence when adding capnography to visual assessment and pulse oximetry in patients undergoing PSA during ambulatory surgery in the hospital setting. Searches for eligible studies published between 1995 and 2015 (inclusive) were conducted in PubMed, the Cochrane Library and EMBASE without any language constraints. Searches were conducted in June, 2015, screening and data extraction was conducted by two independent reviewers, and study quality was assessed using a modified Jadad scale.

### Interventions

Capnography monitoring relative to visual assessment and pulse oximetry alone.

### Primary and Secondary Outcome Measures

Predefined endpoints of interest were desaturation/hypoxemia (the primary endpoint), apnea, aspiration, bradycardia, hypotension, premature procedure termination, respiratory failure, use of assisted/bag-mask ventilation and death during PSA.

### Results

The literature search identified 861 unique articles, of which 11 were ultimately included in the meta-analysis. Addition of capnography to visual assessment and pulse oximetry was associated with a significant reduction in the odds of apnea (OR 0.49, 95% CI 0.32–0.75), as well as mild (OR 0.54, 95% CI

1  
2  
3 0.44–0.66) and severe (OR 0.49, 95% CI 0.34–0.71) desaturation. Reduced occurrence of assisted  
4  
5 ventilation was also observed with capnography, but this did not reach significance.  
6  
7

### 8 **Conclusions**

9  
10 Meta-analysis of 11 RCTs published between 2006 and 2015 showed a reduction in respiratory  
11  
12 compromise (from respiratory insufficiency to failure) during PSA with the inclusion of capnography  
13  
14 monitoring. In particular, use of capnography was associated with less mild and severe oxygen  
15  
16 desaturation, and may help to avoid the need for assisted ventilation.  
17  
18  
19

## 20 **STRENGTHS AND LIMITATIONS OF THIS STUDY**

### 21 **Strengths**

- 22  
23  
24  
25 • The studies included in the analysis were all published in 2006 or later, representing modern  
26  
27 medical practice and providing consistent evidence of improvements in patient safety with the use  
28  
29 of capnography monitoring.  
30  
31
- 32  
33 • The study findings further substantiate a previously-published meta-analysis, which found that  
34  
35 capnography monitoring was more likely to detect adverse events.  
36

### 37 **Limitations**

- 38  
39  
40 • The level of sedation employed in each study was not uniformly reported, resulting in a mixture of  
41  
42 different sedation levels in the primary analysis and precluding an analysis of outcomes by  
43  
44 sedation level.  
45
- 46  
47 • As with all meta-analyses, the study findings may be affected by publication, search or selection  
48  
49 bias affecting the studies ultimately included in the analysis; however, where possible, steps were  
50  
51 taken to minimize the effects of bias on the analysis, but the degree to which these steps were  
52  
53 successful is difficult to quantify.  
54  
55  
56  
57  
58  
59  
60

## BACKGROUND AND AIMS

The administration of procedural sedation and analgesia (PSA) involves achieving a drug-induced depression in level of consciousness and pain to ensure the comfort and cooperation of patients undergoing non-surgical and minor surgical procedures. Significant adverse events associated with PSA are relatively rare but not inconsequential, and can include severe oxygen desaturation, bradycardia, hypotension, and cardiac arrest.<sup>1,2</sup> Consensus dictates that levels of sedation are directly related to patient risk during PSA, as is the potential for unintended progression from moderate to deep sedation.<sup>3</sup> Generally speaking, most cardiopulmonary events associated with PSA stem from poor or absent ventilation cascading into hypoxia, tissue injury and cardiac decompensation (Supplement, Figure 3). In turn, maintaining patient safety involves the identification of respiratory compromise to prompt the use of clinical intervention before further complications occur.<sup>4,5,6,7,8,9</sup>

In current clinical practice, patient monitoring during PSA often relies on visual assessment of ventilation and use of pulse oximetry, which reflects hypoxemia.<sup>10,11,12,13,14</sup> To date, a mandate to include capnography in patient monitoring, as a means of early detection of alveolar hypoventilation, has remained a topic of debate.<sup>15</sup> In particular, there has been a perceived gap between various study outcomes and evidence of improved patient safety. No studies have provided “hard proof” that addition of capnography to patient monitoring may reduce severe morbidity and mortality during PSA (in part because of ethical considerations to ensure patient rescue), and efforts to use meta-analysis to determine the utility of capnography to identify clinically significant respiratory depression have been faulted for large heterogeneity and non-standard endpoints.<sup>16,17</sup>

The primary aim of the present systematic review and meta-analysis was to understand whether capnography added to patient monitoring only (consisting of pulse oximetry and visual inspection of ventilation) reduces the incidence (or odds) of adverse events during PSA based on randomized controlled trials of patients undergoing a variety of surgical procedures. As a secondary aim, a power calculation was performed to determine the number of patients that would be required to

1  
2  
3 demonstrate a reduction in patient harm, defined as severe morbidity or mortality, in a prospective  
4  
5 clinical trial of capnography versus visual assessment with pulse oximetry. The analysis was based on  
6  
7 the hypothesis that earlier and more sensitive detection of ventilatory changes with capnography may  
8  
9 allow for more timely intervention and prevention of potential adverse events, such as cardiac  
10  
11 dysrhythmias. Throughout the analyses, we sought to provide the highest level of synthesized  
12  
13 evidence with respect to the clinical utility of capnography monitoring during PSA. To mitigate  
14  
15 potential pitfalls due to non-standard endpoints, particular emphasis was placed on maintaining a  
16  
17 consistent definition of adverse events across all studies included.  
18  
19

## 20 21 **METHODS**

22  
23  
24 Literature searches were conducted in PubMed, the Cochrane Library and EMBASE. Search terms were  
25  
26 a combination of Medical Subject Heading (MeSH) terms and free-text searches within the articles title  
27  
28 and abstract. Searches aimed to identify all literature reporting on randomized, controlled trials in  
29  
30 patients receiving sedation during ambulatory surgery and in which visual assessment of ventilation  
31  
32 and pulse oximetry monitoring (control) was compared with control plus capnography. No "grey" or  
33  
34 unpublished literature was included in the search strategy and, as the review protocol was not  
35  
36 registered in advance, the full search strategy (Supplement, Table 3) and additional details are  
37  
38 provided in the Supplement. Only articles or abstracts published on or after January 1, 1995 were  
39  
40 included and all searches were performed on June 17, 2015. No language exclusion was applied and  
41  
42 inclusion was not dependent on the capnography monitor in use. After duplicate removal, title and  
43  
44 abstract screening (Supplement, Table 4) was performed independently by RS and RFP. Full-text  
45  
46 versions of all non-excluded articles were retrieved by MM and reviewed independently by RS and  
47  
48 RFP. Data were then extracted independently by RS and RFP into data extraction forms in Microsoft  
49  
50 Excel (Microsoft Corporation, Redmond, WA). Any discrepancies in the extracted data were resolved  
51  
52 by reference to the original study, reaching consensus between RS and RFP. All extracted endpoint  
53  
54 data were reviewed by JL and MMS for clinical utility to ensure that all synthesized data relate to  
55  
56  
57  
58  
59  
60



1  
2  
3 clinically equivalent endpoints. Extracted data included the number of patients with events and the  
4  
5 population at risk, in addition to items required to assess article quality and bias. Reference lists of  
6  
7 included studies were not searched.  
8  
9

### 10 **Endpoints**

11  
12 Predefined endpoints of interest were desaturation/hypoxemia (the primary endpoint, with severe  
13  
14 desaturation defined as  $SpO_2 \leq 85\%$ ), apnea, aspiration, bradycardia, hypotension, premature  
15  
16 procedure termination, respiratory failure, use of assisted/bag-mask ventilation and death during PSA.  
17  
18 The protocol was left open for the analysis of other patient safety endpoints that were reported by  $\geq 3$   
19  
20 studies. Cardiac arrest and death were considered to be representative of severe morbidity and  
21  
22 mortality. Notably, the present analysis examined individual endpoints as opposed to composite  
23  
24 endpoints (e.g. desaturation, apnea, or respiratory depression) and included analyses of more specific  
25  
26 endpoints, such as oxygen desaturation  $<90\%$  and  $<85\%$ , were also conducted.  
27  
28  
29

### 30 **Quality and potential bias**

31  
32 Assessment of article quality was conducted on a study (as opposed to outcome) level using a  
33  
34 modified Jadad score,<sup>18</sup> with additional criteria added to make the adaptation specific to monitoring.  
35  
36 The Jadad score assesses studies based on their design (randomized and blinded) and their reporting  
37  
38 (all patients accounted for), with a maximal score of 5 (high quality) and a low score of 0 (low quality).  
39  
40 Additional data included here were endpoint definitions, patient population, hospital location at which  
41  
42 patients underwent sedation, and the staff responsible for monitoring. In line with the Jadad score,  
43  
44 items related to trial design could score up to twice as highly as items relating to trial reporting. The  
45  
46 reporting of the inclusion/exclusion criteria and endpoint definitions scored one point each, and  
47  
48 reporting the location of sedation, and the monitoring staff scored half-point point each, making the  
49  
50 maximal score 8 (high quality). For the purposes of analyzing study quality, studies with scores of 0–5  
51  
52 were considered to be low quality, while studies scoring 5.5–8 were designated as high quality studies.  
53  
54  
55  
56  
57  
58  
59  
60

1  
2  
3 Risk of bias in results was evaluated independently from the quality assessment through the  
4  
5 declaration of funding sources and conflicts of interest. If the study was funded by industry then the  
6  
7 study scored 2, any conflicts of interest declared relating to industry funding outside of the current  
8  
9 research publication scored 1. A study with low potential for bias, therefore, would have a score of 0. A  
10  
11 high potential for bias was defined as a score of 3, while a score of 1–2 was considered to indicate  
12  
13 moderate potential for bias. The absence of industry funding was not taken to signify an absence of  
14  
15 bias, but the presence of industry funding or conflicts of interest was assumed to be an indicator of  
16  
17 bias.<sup>19</sup>

## 20 Analysis

21  
22 Data extraction, initial data consolidation and summary statistics were performed in Microsoft Excel.  
23  
24 Data for each endpoint were subsequently entered into Review Manager 5.3.4 for results synthesis.<sup>20</sup>  
25  
26 Heterogeneity of data was evaluated using  $\text{Chi}^2$  and  $I^2$  statistics presented by Review Manager 5.3.4,  
27  
28 with  $I^2$  further categorized by the tentative Higgins *et al.* heterogeneity categories of: low, moderate  
29  
30 and high.<sup>21</sup> The meta-analysis performed calculated the mean intervention effect across all eligible  
31  
32 studies using (after analysis of heterogeneity) a random effects model as described by DerSimonian  
33  
34 and Laird.<sup>22</sup> An estimate of between-study variation was provided by the Mantel-Haenszel  
35  
36 methodology.<sup>23</sup> The outcome reported for each endpoint is the pooled mean odds ratio (OR) and its  
37  
38 95% confidence interval.

39  
40  
41 Sensitivity analyses were specified *a priori* and the tested conditions were: (1) inclusion of only  
42  
43 moderate sedation, (2) inclusion of only studies with low risk of bias, (3) inclusion of only studies  
44  
45 based in the US, (4) inclusion of only studies based in Europe, (5) exclusion of pediatric data, (6)  
46  
47 exclusion of gender-specific studies, (7) exclusion of data in patients <30 years of age. No formal  
48  
49 statistical comparisons were made between sensitivity analyses, and intervention effects were not  
50  
51 calculated for the excluded studies, thereby mitigating the introduction of type 1 error into the  
52  
53 analysis.  
54  
55  
56  
57  
58  
59  
60

### Patient involvement

No patients, service users, carers or lay people were involved in the design or conduct of this study.

Outcome measures were all related to patient safety during PSA, but were not developed based on an explicit elicitation of patient priorities, experience, and preferences.

## RESULTS

Literature searches of PubMed, the Cochrane Library and EMBASE returned 353, 76, and 672 articles, respectively. After removal of 240 duplicates (55 Cochrane, 185 EMBASE), 861 articles remained for abstract screening. Although reasons for exclusion varied (Supplement, Table 4), the two independent reviewers agreed upon a total of 19 articles to be retained for full-text review (Cohen's kappa, 1.0). Eight articles were excluded on full-text review (Supplement, Figure 4) because they: reported duplicate data (n=3), did not report patient safety data (n=3), and did not include sedation (n=2). The 11 articles included for analysis are presented in Table 1. All studies reported desaturation endpoints, although the definition did vary by study (Supplement, Table 5). Other endpoints were heterogeneously reported, but were in most cases reported by  $\geq 3$  studies making meta-analysis feasible as per the pre-defined protocol. Results reported are from random-effects models unless otherwise stated. Results for hypotension and use of supplemental oxygen are provided in the Supplement.

### Mild desaturation

All studies (Table 1) reported mild desaturation, with the definition varying from an oxygen saturation ( $\text{SpO}_2$ ) of <95% to <90% for  $\geq 15$  seconds.<sup>5,6,24,25,26,27,28,29,30,31,32</sup> There was little evidence of heterogeneity ( $I^2 = 11\%$ , low) in the primary analysis of high quality studies (n=8). Results indicated that capnography significantly reduced the odds of mild desaturation (OR = 0.54, 95% CI 0.44–0.66; Figure 1B); the odds of a mild desaturation event were approximately halved when capnography monitoring is used, compared with no use of capnography. If all available data were included (Supplement, Figure 5B), there was evidence of significant heterogeneity ( $I^2 = 49\%$ , moderate) with an

1  
2  
3 OR of 0.65 (95% CI 0.51–0.81). Using exclusively studies with equivalent definitions of mild  
4  
5 desaturation (<90%, n=6), evidence of heterogeneity ( $I^2 = 47%$ , moderate) was still present. The OR  
6  
7 estimated from these studies was 0.60 (95% CI 0.46–0.77).  
8  
9

### 10 **Severe desaturation**

11  
12 Six studies, of which three were classified as high quality, reported severe desaturation.<sup>5,25,26,27,28,29</sup> All  
13  
14 but one of the studies defined severe desaturation as  $SpO_2 </\leq 85%$ . The primary analysis for this  
15  
16 endpoint yielded an OR of 0.49 (95% CI 0.34–0.71), further supporting the significant reduction in the  
17  
18 odds of desaturation with the inclusion of capnography (Figure 1). As with mild desaturation, there  
19  
20 was no evidence of heterogeneity in the three high-quality studies ( $I^2 = 0%$ , low).  
21  
22

23  
24 Synthesizing estimates from all available data supported the primary analysis (Supplement, Figure 6),  
25  
26 the OR was reduced by 0.02 and the confidence interval tightened (OR 0.47, 95% CI 0.34–0.66). There  
27  
28 was no significant heterogeneity between studies ( $I^2 = 16%$ , low). Focusing on the five studies  
29  
30 reporting an endpoint of  $SpO_2 </\leq 85%$ , there was no heterogeneity and the OR was estimated at  
31  
32 0.44 (95% CI 0.32–0.60). Overall, results support a greater than 50% reduction in the odds of severe  
33  
34 desaturation events if capnography monitoring is used.  
35  
36

### 37 **Apnea**

38  
39 Apnea was less widely reported or reported in combination with disordered respiration. Comparable  
40  
41 endpoints were reported by four studies, of which two were high quality.<sup>5,6,28,30</sup> Primary analysis  
42  
43 demonstrated a significant reduction in apnea with capnography monitoring (OR 0.49, 95% CI 0.32–  
44  
45 0.75), with no evidence of heterogeneity (Supplement, Figure 7A). If all studies were included the  
46  
47 degree of heterogeneity became significant ( $I^2 = 75%$ , high) and the outcome lacked significance at  
48  
49 the 5% level (OR 0.75, 95% CI 0.43–1.33; Supplement Figure 7B). The difference between the primary  
50  
51 and secondary analyses for apnea was driven by the Kochhar *et al.* study, which found apnea to be  
52  
53 increased in the capnography arm.  
54  
55  
56

### 57 **Bradycardia**

1  
2  
3 Three studies, all of high-quality, reported bradycardia outcomes.<sup>26,27,29</sup> Its definition (heart rate <50  
4 beats/minute) was consistent among trials and there was no evidence of between study heterogeneity  
5 ( $I^2 = 0\%$ , low). In all studies, the incidence of bradycardia was higher in the capnography arm  
6 compared with the control arm (Supplement, Figure 8). Overall, capnography monitoring was  
7 associated with a non-significant increase in bradycardia (OR 1.23, 95% CI 0.87–1.74).  
8  
9  
10  
11  
12

### 13 **Assisted ventilation**

14  
15  
16 Only one study reported one instance of what was termed “respiratory failure,” that was treated with  
17 assisted bag-mask ventilation.<sup>26</sup> In contrast, the number of studies reporting assisted and/or bag-  
18 mask ventilation was sufficient to perform a meta-analysis of this endpoint as a surrogate for  
19 respiratory failure. In total, five studies reported this and all were classified as high-quality.<sup>5,26,27,31,32</sup>  
20  
21 The primary analysis showed no evidence of heterogeneity and an OR of 0.83 (95% CI 0.59–1.17;  
22 Supplement Figure 7C). In every case, the need to provide assisted ventilation was lower in the  
23 capnography arm compared with the control arm (Figure 2). The lack of significance reflects the low  
24 number of observed events and the resulting lack of power. For this reason, a Peto fixed-effects model  
25 was used to estimate the Peto OR, which was 0.54 (95% CI, 0.26–1.12).  
26  
27  
28  
29  
30  
31  
32  
33  
34  
35

### 36 **Sensitivity analyses**

37  
38  
39 A series of sensitivity analyses were conducted in which the studies included in the estimation of the  
40 OR were varied. The results of these analyses are presented in Table 2 and show that results were  
41 generally robust to the studies included for data synthesis. There were limited data available to assess  
42 the impact of capnography monitoring during moderate sedation. Data available indicate that the  
43 impact of capnography is reduced relative to deep sedation. With respect to severe desaturation  
44 events, there was also a substantial difference between US and European data. In Europe, addition of  
45 capnography monitoring was estimated to reduce the odds of severe desaturation by about 40%; for  
46 the US based studies this increased to 65%.  
47  
48  
49  
50  
51  
52  
53  
54  
55  
56  
57  
58  
59  
60

## DISCUSSION

The findings of a meta-analysis of recent RCTs comparing visual assessment of ventilation and pulse oximetry monitoring with and without capnography during PSA showed that the odds of apnea and oxygen desaturation events were significantly reduced with the use of capnography. Other endpoints that could be affected by capnography monitoring were also considered and the majority was found to be associated with substantial, but not significant, benefits to patient safety. Specifically, and of potential clinical importance, was the consistency of data across multiple high-quality clinical trials reporting a reduced incidence of assisted ventilation with capnography monitoring. No endpoints assessed in the meta-analysis indicated significant patient safety concerns with capnography.

Physician concerns for patient safety often focus on mortality and severe morbidity. There was no evidence that these outcomes differed between control and capnography arms in the present meta-analysis. The incidence of these events during nurse-administered PSA has been reported to be 1 event per 303 procedures (0.33%).<sup>33</sup> Taking this value and using the assumption that capnography could prevent 50% of events, the formula provided by Zhong (2009) to calculate the trial size required to demonstrate statistical superiority returned 27,726 patients.<sup>34</sup> Switching to an assumption that capnography would prevent 10% of events, the required trial size was calculated to be >900,000 patients. Not only is the feasibility of performing such a superiority trial low, but meta-analyses such as the present study, are not able to detect this difference from the relatively small number of existing lower-powered studies currently available in peer-reviewed medical literature.

The analysis is timely given the ongoing lively debate as to whether the addition of capnography to patient monitoring during PSA adds value.<sup>17</sup> Without doubt, potential technical and financial burdens have further limited adoption of capnography monitoring in various clinical settings.<sup>15,17</sup> Nevertheless, it is important to recognize that patient safety benefits may offset a number of these concerns if the outcomes are applicable to current medical practice.<sup>35</sup> In this regard, the 11 trials identified in the present analysis were all relatively recent, with the first published study identified in 2006. The data

1  
2  
3 used in the meta-analysis therefore represents modern medical practice, and provides consistent  
4  
5 evidence of improvements in patient safety with the use of capnography monitoring.  
6

7  
8 These findings further substantiate a previously published meta-analysis (Waugh *et al.*), which found  
9  
10 that capnography monitoring was more likely to detect adverse events, but was faulted for large  
11  
12 endpoint heterogeneity.<sup>16</sup> In the present meta-analysis, we focused on identifying high-quality studies,  
13  
14 and on maintaining consistent definitions across all included studies, thereby minimizing potential for  
15  
16 heterogeneity. The results show that the addition of capnography to patient monitoring during PSA  
17  
18 results in increased patient safety, with significant reductions in apnea, as well as mild and severe  
19  
20 levels of oxygen desaturation.  
21

22  
23 More recently, a meta-analysis by Conway *et al.* reported a significant benefit with capnography  
24  
25 during colonoscopy only with respect to hypoxemia. However, the study identified and screened only  
26  
27 a fraction of the literature included in the present analysis (388 papers in Conway *et al.*, compared with  
28  
29 861 papers in the current study) and retrieved fewer randomized controlled trials (6 versus 11). In  
30  
31 addition, Conway *et al.* excluded two trials in which an independent observer monitored capnography  
32  
33 output for all patients, and signaled to the attending physician when respiratory compromise was  
34  
35 identified with capnography either immediately (intervention) or after a specified delay (control).<sup>5,6</sup> The  
36  
37 rationale for this was to prevent unnecessary patient harm while avoiding investigator bias. Based on  
38  
39 our understanding, the two trials excluded in the Conway *et al.* analysis are the only studies in the  
40  
41 literature that could be considered fully blinded. Among the other studies, the attending physician  
42  
43 would have been aware of study arm assignment.<sup>25,27,32</sup>  
44  
45

46  
47 As with other major assessment tools such as Delphi, Consort, and the Cochrane risk of bias tool,  
48  
49 blinding is an integral part of the Jadad score used in the present analysis.<sup>18,36</sup> The trials excluded from  
50  
51 the Conway *et al.* analysis are both considered to be "high quality" in the present analysis, driven in  
52  
53 part by the inclusion of blinding in the scoring methodology. Other included trials, though potentially  
54  
55 more representative of current clinical practice, are open to operator bias, the consequences of which  
56  
57 were demonstrated in 2012 by Veerus *et al.*<sup>37</sup>  
58  
59  
60

1  
2  
3 One potential limitation of the present quality appraisal approach was the lack of validation of the  
4  
5 modifications to the Jadad score; however, as may be expected, the modified score does significantly  
6  
7 correlate with the raw Jadad score (adjusted  $R^2 = 0.83$ ,  $p < 0.01$ ). Furthermore, analysis of mild  
8  
9 desaturation data using a mixed model that took the modified Jadad score as a covariate, found that  
10  
11 the modified Jadad score accounted for 97.5% of the heterogeneity and had both an intercept  
12  
13 ( $p < 0.05$ ) and gradient ( $p < 0.01$ ) significantly different from zero. When blinding was removed from  
14  
15 the score, the model accounted for only 49.9% of heterogeneity and did not reach significance.  
16  
17 Although there is a clear distinction between real-world practice and a clinical trial, these *post-hoc*  
18  
19 analyses demonstrate the potential importance of blinding in trial design. Given the exclusion of  
20  
21 blinded trials, the results of the Conway analysis should be interpreted with this in mind. Nevertheless,  
22  
23 the finding of consistent outcomes for hypoxemia in Conway *et al.* (relative risk 0.59, 95% CI 0.48 to  
24  
25 0.73) and mild desaturation in the present analysis (OR 0.54, 95% CI 0.44 to 0.66; RR 0.65, 95% CI 0.57  
26  
27 to 0.74) was encouraging. These findings are also aligned with a European randomized, controlled trial  
28  
29 of capnography that was published after the analysis was complete.<sup>38</sup>

30  
31  
32  
33 Another ongoing debate in PSA concerns the clinical importance of seemingly minor endpoints, such  
34  
35 as mild desaturation (oxygenation  $< 90\%$  for 15 seconds). Although such endpoints have traditionally  
36  
37 been considered transient and perhaps clinically insignificant during PSA, several recent studies of  
38  
39 common intraoperative events have suggested that mild desaturation may have more impact on  
40  
41 post-surgical outcomes than has previously been recognized.<sup>39</sup> For example, Dunham *et al.* looked  
42  
43 retrospectively and determined that surgical patients who experienced perioperative  
44  
45 hypoxemia/desaturation had a significant increase in their length of hospital stay (+2.0 days,  
46  
47  $p < 0.0001$ ).<sup>40</sup> In turn, the impact of transient desaturation during PSA in terms of patient outcomes and  
48  
49 quality of life may yet be of importance but remains to be determined.  
50  
51

52  
53 Over all of the studies included in the analysis, there were no reports of patient mortality. Only the  
54  
55 largest trials reported any requirement for assisted/bag-mask ventilation, which is used as an  
56  
57 intervention and thereby a proxy measure for potentially life-threatening events. Although it is  
58  
59  
60



1  
2  
3 generally accepted that much larger studies would be useful to assess whether or not capnography  
4  
5 monitoring impacts patient major morbidity and mortality, there has been no determination of the  
6  
7 trial size that would be required. Power calculations suggest such a large randomized controlled trial is  
8  
9 likely to be impractical.

10  
11 For healthcare providers, the most significant finding may be the consistency of data surrounding  
12  
13 apnea and severe oxygen desaturation, as well as reduced need for assisted ventilation with  
14  
15 capnography. Two closed claim reviews both found that inadequate oxygenation/ventilation was the  
16  
17 most frequent event leading to a claim related to PSA outside the operating room.<sup>41,42</sup> The potential  
18  
19 cost burden is demonstrated by the median cost of a claim settled being USD 330,000 (in 2007 USD).<sup>41</sup>  
20  
21 The authors reported that better monitoring would have reduced the number of claims.<sup>41</sup> A similar  
22  
23 message was returned following the fourth National Audit Project in the UK, which analyzed major  
24  
25 complications of airway management in the National Health Service and determined that  
26  
27 capnography monitoring could have led to earlier identification of airway obstruction, potentially  
28  
29 preventing 74% of death or neurological injury cases.<sup>43,44</sup> Studies included in the present meta-analysis  
30  
31 reported that disordered ventilation as detected by capnography preceded desaturation events by 30  
32  
33 to 60 seconds.

34  
35 The meta-analysis did find an increase in bradycardia with capnography monitoring that was non-  
36  
37 significant, but consistent among the three included studies reporting the endpoint. However, in each  
38  
39 of the three trials, patients in the capnography arm had larger doses and increased use of multiple  
40  
41 agents for inducing PSA. Such confounding is plausible, and may not be unusual. In a non-blinded  
42  
43 study published after the present analysis, the authors identified increased incidence of hypotension  
44  
45 in the capnography arm, in addition to higher sedative doses, patient ASA class, and incidence of  
46  
47 comorbidities.<sup>45</sup> All other findings of the current analysis were in line with expectations around the  
48  
49 potential benefits of capnography. Earlier identification of respiratory compromise appears to result in  
50  
51 more timely intervention and prevention of its escalation into patient harm.  
52  
53  
54  
55  
56  
57  
58  
59  
60

1  
2  
3 As with all data synthesis projects, the present study is only as accurate and reliable as the data  
4  
5 underlying it. In the literature, there are examples of newly-published clinical trials that do not align  
6  
7 with the results of published meta-analyses, and meta-analysis results changing on the publication of  
8  
9 new data.<sup>46,47</sup> The systematic nature of study identification and inclusion criteria in the present analysis  
10  
11 was designed to identify all available literature and provide the most robust estimates of intervention  
12  
13 effect. However, the included studies came from a variety of hospital settings, in which the rate of  
14  
15 patient safety events might vary. Analyses for particular settings were undertaken, but were then  
16  
17 limited by reduced data availability. In total, this analysis represented 4,083 patients (control 2,053 and  
18  
19 Capnography 2,030) over 11 studies. Between trials, the number of patients enrolled varied between  
20  
21 132 and 757. Notably, only the four studies including >500 patients identified rare outcomes, such as  
22  
23 differences in use of assisted ventilation.  
24  
25

## 26 27 **CONCLUSIONS**

28  
29 The results of this comprehensive meta-analysis of high-quality clinical trials provide clear and  
30  
31 consistent evidence of decreased respiratory compromise when capnography monitoring is used  
32  
33 during procedural sedation and analgesia (PSA). Specifically, the analysis identified a statistically  
34  
35 significant and clinically meaningful reduction in apnea, as well as in mild and severe oxygen  
36  
37 desaturation. Large, well designed, randomized controlled trials to provide direct links between use of  
38  
39 capnography and reduction in patient harm may not be feasible. In turn, calls for this type of primary  
40  
41 evidence may delay adoption of capnography monitoring during PSA as a valuable tool for early  
42  
43 intervention and improved patient safety.  
44  
45  
46  
47  
48  
49

50  
51 **Word Count** 5,140  
52  
53  
54  
55  
56  
57  
58  
59  
60

## **AUTHOR CONTRIBUTIONS**

MM formulated the research question; RFP and RS devised the search strategy and data extraction protocol, which was critically reviewed and revised by MM, JRL and MMRFS; RFP and RS then conducted the literature searches, screening, data extraction, and meta-analysis, and co-wrote the manuscript; MM, JRL and MMRFS critically reviewed the manuscript and made substantive revisions prior to submission.

## **DATA SHARING STATEMENT**

All data used to derive the outcomes presented in the study are documented in the manuscript and supplementary materials. No additional data are therefore available.

## **PUBLICATION RIGHTS**

The Corresponding Author has the right to grant on behalf of all authors and does grant on behalf of all authors, an exclusive licence (or non-exclusive for government employees) on a worldwide basis to the BMJ Publishing Group Ltd to permit this article (if accepted) to be published in BMJ editions and any other BMJ PGL products and sublicences such use and exploit all subsidiary rights, as set out in our licence.

## **TRANSPARENCY DECLARATION**

The lead author (the manuscript's guarantor) affirms that the manuscript is an honest, accurate, and transparent account of the study being reported. No important aspects of the study have been omitted and any discrepancies from the study as planned (and, if relevant, registered) have been explained.

## ETHICAL APPROVAL

No ethical approval was required for the study as all data were derived from published data; neither animal nor human subjects were enrolled as part of the present study.

## FUNDING AND STUDY SPONSOR ROLE

This study was funded by Medtronic plc following a research proposal submitted by Ossian Health Economics and Communications GmbH. The sponsor reviewed the final manuscript prior to submission, but submission was not contingent on a particular outcome of the analysis.

## FINANCIAL AND COMPETING INTEREST DISCLOSURE

All authors have completed the Unified Competing Interest forms at [www.icmje.org/coi\\_disclosure.pdf](http://www.icmje.org/coi_disclosure.pdf) (available on request from the corresponding author) and declare:

- Michael Mestek is a full-time employee of Medtronic plc.
- Richard Pollock is a full-time employee of Ossian Health Economics and Communications GmbH, which received research and consultancy fees from Medtronic plc. to conduct the literature review and meta-analysis and prepare the manuscript.
- Rhodri Saunders was a full-time employee of Ossian Health Economics and Communications GmbH at the time of performing the meta-analysis and is currently a director of Coreva Scientific GmbH & Co. KG.
- Michel MRF Struys's research group/department received grants and funding from The Medicines Company (USA), Masimo (USA), Fresenius (Germany), Acacia Design (The Netherlands), Medtronic (USA) and honoraria from The Medicines Company (USA), Masimo (USA), Fresenius (Germany), Baxter (USA), Medtronic (USA), Demed Medical (Belgium).
- Jenifer R. Lightdale has served as a consultant for Medtronic and Norgine, and has received speaker honorarium from Mead-Johnson and Perrigo.

## TABLES AND FIGURES

**Table 1** Included studies reporting endpoints of interest

| Study (reference)                 | Country     | Trial dates    | Modified Jadad | Potential for bias | Hospital setting               | Depth of sedation | Sedative            | Monitoring staff                           | Oxygen at baseline | N (control, Cap) |
|-----------------------------------|-------------|----------------|----------------|--------------------|--------------------------------|-------------------|---------------------|--------------------------------------------|--------------------|------------------|
| Beitz 2012 <sup>26</sup>          | Germany     | Feb-10, Jan-11 | 5.5            | High: 3            | Colonoscopy                    | "adequate"        | Propofol            | Not specified                              | 2 L/minute         | 757 (374, 383)   |
| Deitch 2010 <sup>24</sup>         | US          | Nov-06, Feb-08 | 5.5            | Low: 0             | Emergency department           | Moderate          | Propofol            | Not specified                              | 3 L/minute         | 132 (64, 68)     |
| Friedrich-Rust 2014 <sup>27</sup> | Germany     | Jun-12, May-13 | 6              | Low: 0             | Colonoscopy                    | Deep              | Propofol+           | Anesthesiologist or sedation-trained nurse | 2 L/minute         | 533 (266, 267)   |
| Kochhar 2015 <sup>30</sup>        | US          | NA             | 3.5            | Low: 0             | EGD                            | Moderate          | Opioid and BZP      | Not specified                              | Not specified      | 210 (108, 102)   |
| Langhan 2015 <sup>31</sup>        | US          | Sep-11, Jan-13 | 6              | Low: 0             | Pediatric emergency department | NA                | Ketamine, midazolam | "Treating staff"                           | None               | 154 (77, 77)     |
| Lightdale 2006 <sup>6</sup>       | US          | Dec-03, Nov-04 | 8              | Low: 0             | Endoscopy                      | Moderate          | Fentanyl, midazolam | Independent observer                       | 2 L/minute         | 163 (80, 83)     |
| Mehta 2014 <sup>28</sup>          | US          | NA             | 3.5            | Low: 0             | Colonoscopy                    | Moderate          | Opioid and BZP      | Not specified                              | Not specified      | 232 (115, 117)   |
| Qadeer 2009 <sup>5</sup>          | US          | Jan-07, May-08 | 7.5            | Moderate: 1        | ERCP and EUS                   | NA                | Midazolam+          | Independent observer                       | None               | 247 (124, 123)   |
| Slagelse 2013 <sup>32</sup>       | Denmark     | Sep-10, Jan-11 | 6              | Low: 0             | Endoscopy                      | NA                | Propofol            | Sedation-trained nurse                     | 2-3 L/minute       | 540 (277, 263)   |
| van Loon 2014 <sup>25</sup>       | Netherlands | Apr-10, Jan-11 | 5              | Low: 0             | Gynecology                     | Deep              | Propofol            | Medical team providing sedation            | None               | 415 (209, 206)   |
| Zongming 2014 <sup>28</sup>       | China       | Nov-10, May-13 | 6              | Low: 0             | Abortion                       | Deep              | Propofol            | Anesthesiologist                           | 3 L/minute         | 700 (359, 341)   |

1  
2  
3  
4  
5  
6  
7  
8  
9  
10  
11  
12  
13  
14  
15  
16  
17  
18  
19  
20  
21  
22  
23  
24  
25  
26  
27  
28  
29  
30  
31  
32  
33  
34  
35  
36  
37  
38  
39  
40  
41  
42  
43  
44  
45  
46  
47  
48  
49

+, in combination with multiple other agents; BZP, benzodiazepine; Cap, Capnography (arm); EGD, Esophagogastroduodenoscopy; ERCP, Endoscopic retrograde cholangiopancreatography; EUS, Endoscopic ultrasonography

For peer review only

1  
2  
3 **Figure 1 Severe and mild desaturation are reduced with capnography monitoring**  
4

5 The odds ratios for the mild desaturation endpoint are presented for high-quality studies (primary analysis) for  
6 severe desaturation (A) and mild desaturation (B). CI, Confidence interval; M-H, Mantel-Haenszel  
7  
8  
9

10  
11  
12 **Figure 2 The need for assisted ventilation is consistently reduced with capnography**  
13 **monitoring**  
14

15  
16  
17 The odds ratios for the assisted ventilation endpoint are presented for high quality studies, which coincided with  
18 all studies that reported data for the endpoint. CI, Confidence interval; M-H, Mantel-Haenszel  
19  
20  
21  
22  
23  
24  
25  
26  
27  
28  
29  
30  
31  
32  
33  
34  
35  
36  
37  
38  
39  
40  
41  
42  
43  
44  
45  
46  
47  
48  
49  
50  
51  
52  
53  
54  
55  
56  
57  
58  
59  
60

**Table 2** Sensitivity analyses around the primary analyses, treatment effect is the odds ratio [95% confidence interval]

| Scenario                                | Desaturation, mild                                      | Desaturation, severe                                    | Apnea                                                   | Bradycardia                                             | Hypotension                                          | Assisted ventilation                                    | Supplemental oxygen                                     |
|-----------------------------------------|---------------------------------------------------------|---------------------------------------------------------|---------------------------------------------------------|---------------------------------------------------------|------------------------------------------------------|---------------------------------------------------------|---------------------------------------------------------|
| <b>Base case (high quality studies)</b> | <b>0.54</b><br>[0.44, 0.66]<br>RR: 0.65<br>[0.57, 0.74] | <b>0.49</b><br>[0.34, 0.71]<br>RR: 0.54<br>[0.39, 0.75] | <b>0.49</b><br>[0.32, 0.75]<br>RR: 0.68<br>[0.54, 0.85] | <b>1.23</b><br>[0.87, 1.74]<br>RR: 1.20<br>[0.88, 1.65] | <b>1.03</b><br>[0.74, 1.43]<br>RR: 1.02 [0.76, 1.37] | <b>0.54</b><br>[0.25, 1.16]<br>RR: 0.55<br>[0.26, 1.16] | <b>0.85</b><br>[0.65, 1.11]<br>RR: 0.89<br>[0.76, 1.05] |
| All studies with data                   | 0.65<br>[0.51, 0.81]                                    | 0.47<br>[0.34, 0.66]                                    | 0.75<br>[0.43, 1.33]                                    | 1.23<br>[0.87, 1.74]                                    | 1.03<br>[0.74, 1.43]                                 | 0.54<br>[0.25, 1.16]                                    | 0.93<br>[0.65, 1.33]                                    |
| Moderate sedation                       | 0.67<br>[0.44, 1.04]                                    | –                                                       | 0.92<br>[0.52, 1.64]                                    | –                                                       | –                                                    | –                                                       | –                                                       |
| US only                                 | 0.64<br>[0.44, 0.93]                                    | 0.35<br>[0.21, 0.59]                                    | 0.75<br>[0.43, 1.33]                                    | –                                                       | –                                                    | –                                                       | 0.82<br>[0.27, 2.54]                                    |
| Europe only                             | 0.65<br>[0.52, 0.81]                                    | 0.61<br>[0.40, 0.93]                                    | –                                                       | 1.46<br>[0.70, 3.03]                                    | 0.95<br>[0.64, 1.40]                                 | 0.57<br>[0.25, 1.29]                                    | 0.91<br>[0.63, 1.30]                                    |
| Studies with potential bias excluded    | 0.69<br>[0.58, 0.82]                                    | 0.51<br>[0.28, 0.90]                                    | 0.92<br>[0.52, 1.64]                                    | 1.46<br>[0.69, 3.08]                                    | 0.95<br>[0.64, 1.41]                                 | 0.56<br>[0.25, 1.23]                                    | 1.12<br>[0.81, 1.55]                                    |
| Studies in pediatrics excluded          | 0.64<br>[0.54, 0.75]                                    | 0.47<br>[0.34, 0.66]                                    | 0.79<br>[0.38, 1.65]                                    | 1.23<br>[0.87, 1.74]                                    | 1.03<br>[0.74, 1.43]                                 | 0.54<br>[0.25, 1.16]                                    | 0.90<br>[0.63, 1.31]                                    |
| Gender-specific studies excluded        | 0.60<br>[0.50, 0.72]                                    | 0.45<br>[0.31, 0.63]                                    | 0.75<br>[0.43, 1.33]                                    | 1.23<br>[0.87, 1.74]                                    | 1.02<br>[0.71, 1.48]                                 | 0.57<br>[0.25, 1.29]                                    | 0.83<br>[0.59, 1.17]                                    |
| Studies with mean age >30 years         | 0.59<br>[0.49, 0.70]                                    | 0.49<br>[0.33, 0.74]                                    | 0.79<br>[0.38, 1.65]                                    | 1.23<br>[0.87, 1.74]                                    | 1.03<br>[0.74, 1.43]                                 | 0.54<br>[0.25, 1.16]                                    | 0.80<br>[0.57, 1.14]                                    |

CI, confidence interval; OR, odds ratio; RR, risk ratio; US, United States



## REFERENCES

- <sup>1</sup> Sharma VK, Nguyen CC, Crowell MD, Lieberman DA, de Garmo P, Fleischer DE. A national study of cardiopulmonary unplanned events after GI endoscopy. *Gastrointest Endosc.* 2007;66:27–34.
- <sup>2</sup> Gangi S, Saidi F, Patel K, Johnstone B, Jaeger J, Shine D. Cardiovascular complications after GI endoscopy: occurrence and risks in a large hospital system. *Gastrointest Endosc.* 2004;60:679–85.
- <sup>3</sup> Erden IA, Pamuk AG, Akinci SB, Koseoglu A, Aypar U. Comparison of two ketamine-propofol dosing regimens for sedation during interventional radiology procedures. *Minerva anesthesiologica* 2010;76:260–5.
- <sup>4</sup> Lichtenstein DR, Jagannath S, Baron TH, *et al.* Sedation and anesthesia in GI endoscopy. *Gastrointest Endosc.* 2008;68:205–16.
- <sup>5</sup> Qadeer MA, Vargo JJ, Dumot JA, *et al.* Capnographic monitoring of respiratory activity improves safety of sedation for endoscopic cholangiopancreatography and ultrasonography. *Gastroenterology.* 2009;136:1568–76.
- <sup>6</sup> Lightdale JR, Goldmann DA, Feldman HA, Newburg AR, DiNardo JA, Fox VL. Microstream capnography improves patient monitoring during moderate sedation: a randomized, controlled trial. *Pediatrics.* 2006;117:e1170–8.
- <sup>7</sup> Cotton PB, Eisen GM, Aabakken L, *et al.* A lexicon for endoscopic adverse events: report of an ASGE workshop. *Gastrointest Endosc.* 2010;71:446–54.
- <sup>8</sup> Vargo JJ, Cohen LB, Rex DK, Kwo PY. Position statement: nonanesthesiologist administration of propofol for GI endoscopy. *Gastrointest Endosc.* 2009;70:1053–9.
- <sup>9</sup> Qadeer MA, Rocio Lopez A, Dumot JA, Vargo JJ. Risk Factors for Hypoxemia During Ambulatory Gastrointestinal Endoscopy in ASA I-II Patients. *Dig Dis Sci.* 2009;54(5):1035–40.

- 1  
2  
3  
4 <sup>10</sup> Radaelli F, Terruzzi V, Minoli G. Extended/advanced monitoring techniques in gastrointestinal  
5  
6 endoscopy. *Gastrointest Endosc Clin N Am*. 2004;14:335–52.  
7  
8  
9 <sup>11</sup> Kober A, Schubert B, Bertalanffy P, et al. Capnography in non-tracheally intubated emergency  
10  
11 patients as an additional tool in pulse oximetry for prehospital monitoring of respiration. *Anesth*  
12  
13 *Analg*. 2004;98:206–10.  
14  
15 <sup>12</sup> Soto RG, Fu ES, Vila H, Jr., Miguel RV. Capnography accurately detects apnea during monitored  
16  
17 anesthesia care. *Anesth Analg*. 2004;99:379–82.  
18  
19  
20 <sup>13</sup> Thomas PE. What's the latest on carbon dioxide monitoring? *Neonatal Netw*. 2004;23:70–2.  
21  
22  
23 <sup>14</sup> Yildzdas D, Yapcoglu H, Ylmaz HL. The value of capnography during sedation or sedation/analgesia  
24  
25 in pediatric minor procedures. *Pediatr Emerg Care*. 2004;20:162–5.  
26  
27  
28 <sup>15</sup> American Society for Gastrointestinal Endoscopy, American College of Gastroenterology,  
29  
30 Association TAG. Universal adoption of capnography for moderate sedation in adults undergoing  
31  
32 upper endoscopy and colonoscopy has not been shown to improve patient safety or clinical outcomes  
33  
34 and significantly increases costs for moderate sedation. Available from:  
35  
36 <http://www.asge.org/assets/0/71542/71544/90dc9b63-593d-48a9-bec1-9f0ab3ce946a.pdf> Last  
37  
38 accessed April 11, 2016.  
39  
40  
41 <sup>16</sup> Waugh JB, Epps CA, Khodneva YA. Capnography enhances surveillance of respiratory events during  
42  
43 procedural sedation: a meta-analysis. *J Clin Anesth*. 2011;23:189–96.  
44  
45  
46 <sup>17</sup> Cook TM. The winds of change - progress in the implementation of universal capnography.  
47  
48 *Anaesthesia*. 2016;71(4):363–8.  
49  
50  
51 <sup>18</sup> Jadad AR, Moore RA, Carroll D, et al. Assessing the quality of reports of randomized clinical trials: is  
52  
53 blinding necessary? *Control Clin Trials*. 1996;17(1):1–12.  
54  
55  
56 <sup>19</sup> Lexchin J, Bero LA, Djulbegovic B, Clark O. Pharmaceutical industry sponsorship and research  
57  
58 outcome and quality: systematic review. *BMJ*. 2003;326(7400):1167–70.  
59  
60

1  
2  
3  
4 <sup>20</sup> Review Manager. The Nordic Cochrane Centre, The Cochrane Collaboration, Copenhagen, Denmark.

5  
6  
7 <sup>21</sup> Higgins JP, Thompson SG, Deeks JJ, Altman DG. Measuring inconsistency in meta-analyses. *BMJ*.  
8  
9 2003;327(7414):557–560.

10  
11 <sup>22</sup> DerSimonian R, Laird N. Meta-analysis in clinical trials. *Control Clin Trials*. 1986;7(3):177–88.

12  
13  
14 <sup>23</sup> Mantel N, Haenszel W. Statistical aspects of the analysis of data from retrospective studies of  
15  
16 disease. *Journal of the National Cancer Institute* 1959;22:719–48.

17  
18  
19 <sup>24</sup> Deitch K, Miner J, Chudnofsky CR, Dominici P, Latta D. Does end tidal CO2 monitoring during  
20  
21 emergency department procedural sedation and analgesia with propofol decrease the incidence of  
22  
23 hypoxic events? A randomized, controlled trial. *Ann Emerg Med*. 2010;55:258–64.

24  
25  
26 <sup>25</sup> van Loon K, van Rheineck Leyssius AT, van Zaane B, Denteneer M, Kalkman CJ. Capnography during  
27  
28 deep sedation with propofol by nonanesthesiologists: a randomized controlled trial. *Anesth Analg*.  
29  
30 2014;119:49–55.

31  
32  
33 <sup>26</sup> Beitz A, Riphaut A, Meining A, *et al*. Capnographic monitoring reduces the incidence of arterial  
34  
35 oxygen desaturation and hypoxemia during propofol sedation for colonoscopy: a randomized,  
36  
37 controlled study (ColoCap Study). *Am J Gastroenterol*. 2012;107:1205–12.

38  
39  
40 <sup>27</sup> Friedrich-Rust M, Welte M, Welte C, *et al*. Capnographic monitoring of propofol-based sedation  
41  
42 during colonoscopy. *Endoscopy*. 2014;46:236–44.

43  
44  
45 <sup>28</sup> Mehta P, Kochhar G, Albeldawi M, *et al*. Capnographic Monitoring Does Not Improve Detection of  
46  
47 Hypoxemia in Colonoscopy With Moderate Sedation: A Randomized, Controlled Trial. *Am J*  
48  
49 *Gastroenterol*. 2014;109:S588.

50  
51 <sup>29</sup> Zongming J, Zhonghua C, Xiangming F. Sidestream capnographic monitoring reduces the incidence  
52  
53 of arterial oxygen desaturation during propofol ambulatory anesthesia for surgical abortion. *Med Sci*  
54  
55 *Monit*. 2014;20:2336–42.  
56  
57  
58  
59  
60

1  
2  
3  
4 <sup>30</sup> Kochhar G, Mehta PP, Kirsh B, Rizk MK, Wang Y, John B, Albeldawi M, Vargo JJ. Tu2057 Does  
5  
6 Capnography Prevent Hypoxemia in ASA 1-2 Outpatients Undergoing Elective EGD Targeting  
7  
8 Moderate Sedation? Results from a Prospective, Randomized, Single Blinded Study.  
9  
10 Gastroenterology;148:S-1196.

11  
12  
13 <sup>31</sup> Langan ML, Shabanova V, Li FY, Bernstein SL, Shapiro ED. A randomized controlled trial of  
14  
15 capnography during sedation in a pediatric emergency setting. Am J Emerg Med. 2015;33:25-30.

16  
17  
18 <sup>32</sup> Slagelse C, Vilmann P, Hornslet P, Jorgensen HL, Horsted TI. The role of capnography in endoscopy  
19  
20 patients undergoing nurse-administered propofol sedation: a randomized study. Scand J  
21  
22 Gastroenterol. 2013;48(10):1222-30.

23  
24  
25 <sup>33</sup> Guimaraes ES, Campbell EJ, Richter JM. The Safety of Nurse-Administered Procedural Sedation  
26  
27 Compared to Anesthesia Care in a Historical Cohort of Advanced Endoscopy Patients. Anesth Analg.  
28  
29 2014;119(2):349-56.

30  
31  
32 <sup>34</sup> Zhong B. How to Calculate Sample Size in Randomized Controlled Trial? J Thorac Dis. 2009;1(1):51-  
33  
34 54.

35  
36  
37 <sup>35</sup> Saunders R, Erslon M, Vargo J. Modeling the costs and benefits of capnography monitoring during  
38  
39 procedural sedation for gastrointestinal endoscopy. Endosc Int Open. 2016;4(3):E340-51.

40  
41  
42 <sup>36</sup> Berger VW and Alperson SY. A general framework for the evaluation of clinical trial quality. Rev  
43  
44 Recent Clin Trials. 2009;4(2):79-88.

45  
46  
47 <sup>37</sup> Veerus P, Fischer K, Hakama M, Hemminki E; EPHT Trial. Results from a blind and a non-blind  
48  
49 randomised trial run in parallel: experience from the Estonian Postmenopausal Hormone Therapy  
50  
51 (EPHT) Trial. BMC Med Res Methodol. 2012;12:44.

52  
53  
54 <sup>38</sup> Klare Peter, Reiter Johanna, Meining Alexander, et al. Capnographic monitoring of midazolam and  
55  
56 propofol sedation during ERCP: a randomized controlled study (EndoBreath Study). Endoscopy.  
57  
58 2016;48:42-50.

1  
2  
3  
4 <sup>39</sup> Ehrenfeld JM, Funk LM, Van Schalkwyk J, Merry AF, Sandberg WS, Gawande A. The incidence of  
5 hypoxemia during surgery: evidence from two institutions. *Can J Anaesth*. 2010;57(10):888–97.  
6  
7

8  
9 <sup>40</sup> Dunham CM, Hileman BM, Hutchinson AE, Chance EA, Huang GS. Perioperative hypoxemia is  
10 common with horizontal positioning during general anesthesia and is associated with major adverse  
11 outcomes: a retrospective study of consecutive patients. *BMC Anesthesiol*. 2014;14:43.  
12  
13

14  
15 <sup>41</sup> Metzner J, Posner KL, Domino KB. The risk and safety of anesthesia at remote locations: the US  
16 closed claims analysis. *Curr Opin Anaesthesiol*. 2009;22(4):502–8.  
17  
18

19  
20 <sup>42</sup> Robbertze R, Posner KL, Domino KB. Closed claims review of anesthesia for procedures outside the  
21 operating room. *Curr Opin Anaesthesiol*. 2006;19(4):436–42.  
22  
23

24  
25 <sup>43</sup> Cook TM, Woodall N, Harper J, Benger J. Major complications of airway management in the UK:  
26 results of the Fourth National Audit Project of the Royal College of Anaesthetists and the Difficult  
27 Airway Society. Part 2: intensive care and emergency departments. *Br J Anaesth*. 2011;106:632–42.  
28  
29

30  
31 <sup>44</sup> Cook TM, Woodall N, Frerk C; Fourth National Audit Project. Major complications of airway  
32 management in the UK: results of the Fourth National Audit Project of the Royal College of  
33 Anaesthetists and the Difficult Airway Society. Part 1: anaesthesia. *Br J Anaesth*. 2011;106(5):632–42.  
34  
35  
36

37  
38 <sup>45</sup> Campbell SG, Magee KD, Zed PJ, *et al*. End-tidal capnometry during emergency department  
39 procedural sedation and analgesia: a randomized, controlled study. *World J Emerg Med*.  
40 2016;7(1):13–8.  
41  
42  
43

44  
45 <sup>46</sup> LeLorier J, Gregoire G, Benhaddad A, Lapierre J, Derderian F. Discrepancies between meta-analyses  
46 and subsequent large randomized, controlled trials. *N Engl J Med*. 1997;337(8):536–42.  
47  
48

49  
50 <sup>47</sup> Trikalinos TA, Churchill R, Ferri M, *et al*. Effect sizes in cumulative meta-analyses of mental health  
51 randomized trials evolved over time. *J Clin Epidemiol*. 2004;57(11):1124–30.  
52  
53  
54

1  
2  
3  
4  
5  
6  
7  
8  
9  
10  
11  
12  
13  
14  
15  
16  
17  
18  
19  
20  
21  
22  
23  
24  
25  
26  
27  
28  
29  
30  
31  
32  
33  
34  
35  
36  
37  
38  
39  
40  
41  
42  
43  
44  
45  
46  
47  
48  
49  
50  
51  
52  
53  
54  
55  
56  
57  
58  
59  
60

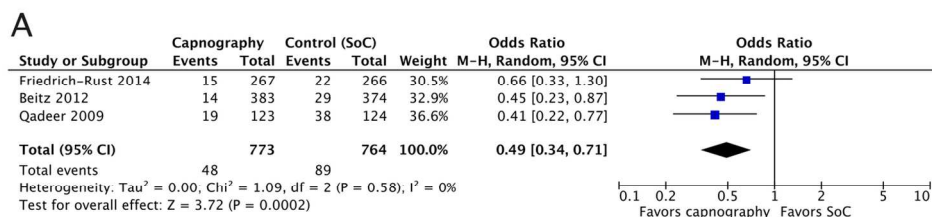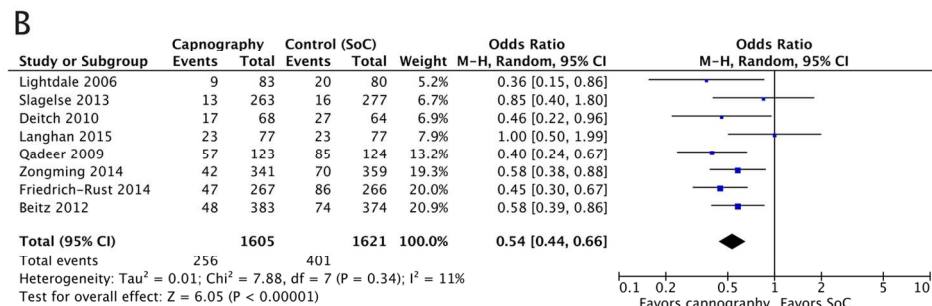

Severe and mild desaturation are reduced with capnography monitoring

Figure 1

128x78mm (300 x 300 DPI)

1  
2  
3  
4  
5  
6  
7  
8  
9  
10  
11  
12  
13  
14  
15  
16  
17  
18  
19  
20  
21  
22  
23  
24  
25  
26  
27  
28  
29  
30  
31  
32  
33  
34  
35  
36  
37  
38  
39  
40  
41  
42  
43  
44  
45  
46  
47  
48  
49  
50  
51  
52  
53  
54  
55  
56  
57  
58  
59  
60

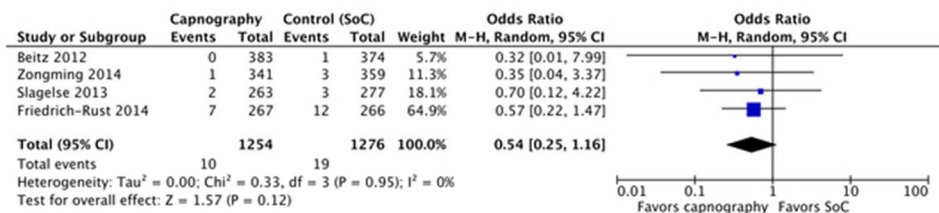

The need for assisted ventilation is consistently reduced with capnography monitoring

Figure 2

56x15mm (300 x 300 DPI)

peer review only

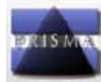

# PRISMA 2009 Checklist

| Section/topic                      | #  | Checklist item                                                                                                                                                                                                                                                                                              | Reported on page # |
|------------------------------------|----|-------------------------------------------------------------------------------------------------------------------------------------------------------------------------------------------------------------------------------------------------------------------------------------------------------------|--------------------|
| <b>TITLE</b>                       |    |                                                                                                                                                                                                                                                                                                             |                    |
| Title                              | 1  | Identify the report as a systematic review, meta-analysis, or both.                                                                                                                                                                                                                                         | 1                  |
| <b>ABSTRACT</b>                    |    |                                                                                                                                                                                                                                                                                                             |                    |
| Structured summary                 | 2  | Provide a structured summary including, as applicable: background; objectives; data sources; study eligibility criteria, participants, and interventions; study appraisal and synthesis methods; results; limitations; conclusions and implications of key findings; systematic review registration number. | 2-3                |
| <b>INTRODUCTION</b>                |    |                                                                                                                                                                                                                                                                                                             |                    |
| Rationale                          | 3  | Describe the rationale for the review in the context of what is already known.                                                                                                                                                                                                                              | 4                  |
| Objectives                         | 4  | Provide an explicit statement of questions being addressed with reference to participants, interventions, comparisons, outcomes, and study design (PICOS).                                                                                                                                                  | 4                  |
| <b>METHODS</b>                     |    |                                                                                                                                                                                                                                                                                                             |                    |
| Protocol and registration          | 5  | Indicate if a review protocol exists, if and where it can be accessed (e.g., Web address), and, if available, provide registration information including registration number.                                                                                                                               | 5                  |
| Eligibility criteria               | 6  | Specify study characteristics (e.g., PICOS, length of follow-up) and report characteristics (e.g., years considered, language, publication status) used as criteria for eligibility, giving rationale.                                                                                                      | 5-6                |
| Information sources                | 7  | Describe all information sources (e.g., databases with dates of coverage, contact with study authors to identify additional studies) in the search and date last searched.                                                                                                                                  | 5                  |
| Search                             | 8  | Present full electronic search strategy for at least one database, including any limits used, such that it could be repeated.                                                                                                                                                                               | 22                 |
| Study selection                    | 9  | State the process for selecting studies (i.e., screening, eligibility, included in systematic review, and, if applicable, included in the meta-analysis).                                                                                                                                                   | 22                 |
| Data collection process            | 10 | Describe method of data extraction from reports (e.g., piloted forms, independently, in duplicate) and any processes for obtaining and confirming data from investigators.                                                                                                                                  | 5                  |
| Data items                         | 11 | List and define all variables for which data were sought (e.g., PICOS, funding sources) and any assumptions and simplifications made.                                                                                                                                                                       | 6                  |
| Risk of bias in individual studies | 12 | Describe methods used for assessing risk of bias of individual studies (including specification of whether this was done at the study or outcome level), and how this information is to be used in any data synthesis.                                                                                      | 6                  |
| Summary measures                   | 13 | State the principal summary measures (e.g., risk ratio, difference in means).                                                                                                                                                                                                                               | 7                  |
| Synthesis of results               | 14 | Describe the methods of handling data and combining results of studies, if done, including measures of consistency (e.g., $I^2$ ) for each meta-analysis.                                                                                                                                                   | 7                  |



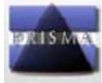

# PRISMA 2009 Checklist

| Section/topic                 | #  | Checklist item                                                                                                                                                                                           | Reported on page # |
|-------------------------------|----|----------------------------------------------------------------------------------------------------------------------------------------------------------------------------------------------------------|--------------------|
| Risk of bias across studies   | 15 | Specify any assessment of risk of bias that may affect the cumulative evidence (e.g., publication bias, selective reporting within studies).                                                             | 6                  |
| Additional analyses           | 16 | Describe methods of additional analyses (e.g., sensitivity or subgroup analyses, meta-regression), if done, indicating which were pre-specified.                                                         | 7                  |
| <b>RESULTS</b>                |    |                                                                                                                                                                                                          |                    |
| Study selection               | 17 | Give numbers of studies screened, assessed for eligibility, and included in the review, with reasons for exclusions at each stage, ideally with a flow diagram.                                          | 23                 |
| Study characteristics         | 18 | For each study, present characteristics for which data were extracted (e.g., study size, PICOS, follow-up period) and provide the citations.                                                             | 19,24              |
| Risk of bias within studies   | 19 | Present data on risk of bias of each study and, if available, any outcome level assessment (see item 12).                                                                                                | 16                 |
| Results of individual studies | 20 | For all outcomes considered (benefits or harms), present, for each study: (a) simple summary data for each intervention group (b) effect estimates and confidence intervals, ideally with a forest plot. | 17,24-27           |
| Synthesis of results          | 21 | Present results of each meta-analysis done, including confidence intervals and measures of consistency.                                                                                                  | 17,24-27           |
| Risk of bias across studies   | 22 | Present results of any assessment of risk of bias across studies (see Item 15).                                                                                                                          | 18                 |
| Additional analysis           | 23 | Give results of additional analyses, if done (e.g., sensitivity or subgroup analyses, meta-regression [see Item 16]).                                                                                    | 18                 |
| <b>DISCUSSION</b>             |    |                                                                                                                                                                                                          |                    |
| Summary of evidence           | 24 | Summarize the main findings including the strength of evidence for each main outcome; consider their relevance to key groups (e.g., healthcare providers, users, and policy makers).                     | 12-13              |
| Limitations                   | 25 | Discuss limitations at study and outcome level (e.g., risk of bias), and at review-level (e.g., incomplete retrieval of identified research, reporting bias).                                            | 13                 |
| Conclusions                   | 26 | Provide a general interpretation of the results in the context of other evidence, and implications for future research.                                                                                  | 13                 |
| <b>FUNDING</b>                |    |                                                                                                                                                                                                          |                    |
| Funding                       | 27 | Describe sources of funding for the systematic review and other support (e.g., supply of data); role of funders for the systematic review.                                                               | 14                 |

From: Moher D, Liberati A, Tetzlaff J, Altman DG, The PRISMA Group (2009). Preferred Reporting Items for Systematic Reviews and Meta-Analyses: The PRISMA Statement. PLoS Med 6(7): e1000097. doi:10.1371/journal.pmed1000097

For more information, visit: [www.prisma-statement.org](http://www.prisma-statement.org).

# BMJ Open

## PATIENT SAFETY DURING PROCEDURAL SEDATION USING CAPNOGRAPHY MONITORING: A SYSTEMATIC REVIEW AND META-ANALYSIS

|                                    |                                                                                                                                                                                                                                                                                                                                                                   |
|------------------------------------|-------------------------------------------------------------------------------------------------------------------------------------------------------------------------------------------------------------------------------------------------------------------------------------------------------------------------------------------------------------------|
| Journal:                           | <i>BMJ Open</i>                                                                                                                                                                                                                                                                                                                                                   |
| Manuscript ID                      | bmjopen-2016-013402.R2                                                                                                                                                                                                                                                                                                                                            |
| Article Type:                      | Research                                                                                                                                                                                                                                                                                                                                                          |
| Date Submitted by the Author:      | 08-Feb-2017                                                                                                                                                                                                                                                                                                                                                       |
| Complete List of Authors:          | Saunders, Rhodri; Coreva Scientific GmbH & Co. KG.<br>Struys, Michel; University of Groningen, Department of Anesthesiology<br>Pollock, Richard; Ossian Health Economics and Communications GmbH,<br>Mestek, Michael; Medtronic Inc, Patient Monitoring & Recovery<br>Lightdale, Jenifer; UMass Memorial Children's Medical Center, Pediatric<br>Gastroenterology |
| <b>Primary Subject<br>Heading</b>: | Anaesthesia                                                                                                                                                                                                                                                                                                                                                       |
| Secondary Subject Heading:         | Respiratory medicine                                                                                                                                                                                                                                                                                                                                              |
| Keywords:                          | Capnography, Meta-analysis, Procedural sedation, Ambulatory surgery                                                                                                                                                                                                                                                                                               |
|                                    |                                                                                                                                                                                                                                                                                                                                                                   |

SCHOLARONE™  
Manuscripts

**PATIENT SAFETY DURING PROCEDURAL SEDATION USING CAPNOGRAPHY****MONITORING: A SYSTEMATIC REVIEW AND META-ANALYSIS**

**Authors:** Rhodri Saunders DPhil<sup>1,2</sup>, Michel MRF Struys MD PhD FRCA<sup>3</sup>, Richard F Pollock MA MSci<sup>2</sup>, Michael Mestek PhD<sup>4</sup>, Jenifer R Lightdale MD MPH<sup>5</sup>

**Affiliations:** <sup>1</sup> Coreva Scientific GmbH & Co. KG., Freiburg, Germany  
<sup>2</sup> Ossian Health Economics and Communications, Basel, Switzerland  
<sup>3</sup> Department of Anesthesiology, University of Groningen, University Medical Center Groningen, Groningen, The Netherlands; Department of Anesthesia, Ghent University, Ghent, Belgium  
<sup>4</sup> Medtronic, Patient Monitoring & Recovery, Boulder, CO  
<sup>5</sup> Division of Pediatric Gastroenterology, UMass Memorial Children's Medical Center, Worcester, MA; Department of Pediatrics, University of Massachusetts Medical School, Worcester, MA

**Corresponding author:** Richard Pollock MA MSci  
Ossian Health Economics and Communications GmbH,  
Bäumleingasse 20,  
4051 Basel, Switzerland  
+41 61 271 62 14  
pollock@ossianconsulting.com

**Word count:** 5,233

**Running title:** Patient safety during sedation: a meta-analysis

**Key words:** Capnography; Respiratory compromise; Oxygen desaturation; Apnea; Assisted ventilation;

**Target journal:** BMJ

**Grant support:** This study was supported by funding from Medtronic plc.

## ABSTRACT

### Objective

To evaluate the effect of capnography monitoring on sedation-related adverse events during procedural sedation and analgesia (PSA) administered during ambulatory surgery relative to visual assessment and pulse oximetry alone.

### Design and Setting

Systematic literature review and random effects meta-analysis of randomized controlled trials (RCTs) reporting sedation-related adverse event incidence when adding capnography to visual assessment and pulse oximetry in patients undergoing PSA during ambulatory surgery in the hospital setting. Searches for eligible studies published between January 1, 1995 and December 31, 2016 (inclusive) were conducted in PubMed, the Cochrane Library and EMBASE without any language constraints. Searches were conducted in January 2017, screening and data extraction were conducted by two independent reviewers, and study quality was assessed using a modified Jadad scale.

### Interventions

Capnography monitoring relative to visual assessment and pulse oximetry alone.

### Primary and Secondary Outcome Measures

Predefined endpoints of interest were desaturation/hypoxemia (the primary endpoint), apnea, aspiration, bradycardia, hypotension, premature procedure termination, respiratory failure, use of assisted/bag-mask ventilation and death during PSA.

### Results

The literature search identified 1,006 unique articles, of which 13 were ultimately included in the meta-analysis. Addition of capnography to visual assessment and pulse oximetry was associated with a significant reduction in mild (RR 0.77, 95% CI 0.67–0.89) and severe (RR 0.59, 95% CI 0.43–0.81)

1  
2  
3 desaturation, as well as in the use of assisted ventilation (RR 0.47, 95% CI 0.23–0.95). No significant  
4  
5 difference in other endpoints were identified.  
6  
7

### 8 **Conclusions**

9  
10 Meta-analysis of 13 RCTs published between 2006 and 2016 showed a reduction in respiratory  
11  
12 compromise (from respiratory insufficiency to failure) during PSA with the inclusion of capnography  
13  
14 monitoring. In particular, use of capnography was associated with less mild and severe oxygen  
15  
16 desaturation, which may have helped to avoid the need for assisted ventilation.  
17  
18  
19

## 20 **STRENGTHS AND LIMITATIONS OF THIS STUDY**

### 21 **Strengths**

- 22  
23  
24  
25  
26  
27  
28  
29  
30  
31  
32  
33  
34  
35  
36  
37  
38  
39  
40
- The studies included in the analysis were all published in 2006 or later, representing modern medical practice and providing clinically relevant evidence of improvements in patient safety with the use of capnography monitoring.
  - The study findings further substantiate a previously-published meta-analysis, which found that capnography monitoring was more likely to detect adverse events. It also suggests that superior detection may reduce the use of clinical interventions intended to rescue patients from potential adverse outcomes.

### 41 **Limitations**

- 42  
43  
44  
45  
46  
47  
48  
49  
50  
51  
52  
53  
54  
55  
56  
57  
58  
59  
60
- The level of sedation employed in each study was not uniformly reported, resulting in a mixture of different sedation levels in the primary analysis and precluding an analysis of outcomes by sedation level.
  - As with all meta-analyses, the study findings may be affected by publication, search or selection bias affecting the studies ultimately included in the analysis; however, where possible, steps were taken to minimize the effects of bias on the analysis, but the degree to which these steps were successful is difficult to quantify.

## BACKGROUND AND AIMS

The administration of procedural sedation and analgesia (PSA) involves achieving a drug-induced depression in level of consciousness and pain to ensure the comfort and cooperation of patients undergoing non-surgical and minor surgical procedures. Significant adverse events associated with PSA are relatively rare but not inconsequential, and can include severe oxygen desaturation, bradycardia, hypotension, and cardiac arrest.<sup>1,2</sup> Consensus dictates that levels of sedation are directly related to patient risk during PSA, as is the potential for unintended progression from moderate to deep sedation.<sup>3</sup> Generally speaking, most cardiopulmonary events associated with PSA stem from poor or absent ventilation cascading into hypoxia, tissue injury and cardiac decompensation (Supplementary Figure 1). In turn, maintaining patient safety involves the identification of respiratory compromise to prompt the use of clinical intervention before further complications occur.<sup>4,5,6,7,8,9</sup>

In current clinical practice, patient monitoring during PSA often relies on visual assessment of ventilation and use of pulse oximetry, which reflects hypoxemia.<sup>10,11,12,13,14</sup> To date, a mandate to include capnography in patient monitoring, as a means of early detection of alveolar hypoventilation, has remained a topic of debate.<sup>15</sup> In particular, there has been a perceived gap between various study outcomes and evidence of improved patient safety. No studies have provided “hard proof” that addition of capnography to patient monitoring may reduce severe morbidity and mortality during PSA (in part because of ethical considerations to ensure patient rescue). Previous efforts to use meta-analysis to determine the utility of capnography to identify clinically significant respiratory depression have been faulted for large heterogeneity and non-standard endpoints.<sup>16,17</sup>

The primary aim of the present systematic review and meta-analysis was to understand whether capnography added to patient monitoring only (consisting of pulse oximetry and visual inspection of ventilation) reduces the incidence (or odds) of adverse events during PSA based on randomized controlled trials of patients undergoing a variety of surgical procedures. As a secondary aim, a power calculation was performed to determine the number of patients that would be required to

1  
2  
3 demonstrate a reduction in patient harm, defined as severe morbidity or mortality, in a prospective  
4 clinical trial of capnography versus visual assessment with pulse oximetry. The analysis was based on  
5 the hypothesis that earlier and more sensitive detection of ventilatory changes with capnography may  
6 allow for more timely intervention and prevention of potential adverse events, such as cardiac  
7 dysrhythmias. Throughout the analyses, we sought to provide the highest level of synthesized  
8 evidence with respect to the clinical utility of capnography monitoring during PSA. To mitigate  
9 potential pitfalls due to non-standard endpoints, particular emphasis was placed on maintaining a  
10 consistent definition of adverse events across all studies included.  
11  
12  
13  
14  
15  
16  
17  
18  
19

## 20 21 **METHODS**

22  
23 Literature searches were conducted in PubMed, the Cochrane Library and EMBASE. Search terms were  
24 a combination of Medical Subject Heading (MeSH) terms and free-text searches within the articles title  
25 and abstract. Searches aimed to identify all literature reporting on randomized, controlled trials in  
26 patients receiving sedation during ambulatory surgery and in which visual assessment of ventilation  
27 and pulse oximetry monitoring (control) was compared with control plus capnography. "Grey" or  
28 unpublished literature (including congress abstracts) was included in the search strategy and, as the  
29 review protocol was not registered in advance, the full search strategy (Supplementary Table 1) and  
30 additional details are provided in the Supplement. Only articles or abstracts published on or after  
31 January 1, 1995 were included and all searches were performed on January 15, 2017. A previous  
32 systematic review in this area did not identify any study prior to 1995,<sup>16</sup> and studies published prior to  
33 1995 were considered unlikely to reflect modern clinical practice. No language exclusion was applied  
34 and inclusion was not dependent on the capnography monitor in use. After duplicate removal, title  
35 and abstract screening (Supplementary Table 2) was performed independently by RS and RFP using  
36 Sourcerer (Covalence Research Ltd, London UK).<sup>18</sup> Full-text versions of all non-excluded articles were  
37 retrieved by MM and reviewed independently by RS and RFP. Data were then extracted independently  
38 by RS and RFP into data extraction forms in Microsoft Excel (Microsoft Corporation, Redmond, WA).  
39  
40  
41  
42  
43  
44  
45  
46  
47  
48  
49  
50  
51  
52  
53  
54  
55  
56  
57  
58  
59  
60

1  
2  
3 Any discrepancies in the extracted data were resolved by reference to the original study, reaching  
4  
5 consensus between RS and RFP. All extracted endpoint data were reviewed by JL and MMS for clinical  
6  
7 utility to ensure that all synthesized data relate to clinically equivalent endpoints. Extracted data  
8  
9 included the number of patients with events and the population at risk, in addition to items required  
10  
11 to assess article quality and bias. Reference lists of included studies were not searched.  
12

### 13 14 **Endpoints**

15  
16 Predefined endpoints of interest were desaturation/hypoxemia (the primary endpoint, with severe  
17  
18 desaturation defined as  $SpO_2 \leq 85\%$ ), apnea, aspiration, bradycardia, hypotension, premature  
19  
20 procedure termination, respiratory failure, use of assisted/bag-mask ventilation and death during PSA.  
21  
22 The protocol was left open for the analysis of other patient safety endpoints that were reported by  $\geq 3$   
23  
24 studies. Cardiac arrest and death were considered to be representative of severe morbidity and  
25  
26 mortality. Notably, the present analysis examined individual endpoints as opposed to composite  
27  
28 endpoints (e.g. desaturation, apnea, or respiratory depression) and included analyses of more specific  
29  
30 endpoints, such as oxygen desaturation  $< 90\%$  and  $< 85\%$ .  
31  
32  
33

### 34 **Quality and potential bias**

35  
36 Assessment of article quality was conducted on a study (as opposed to outcome) level using a  
37  
38 modified Jadad score,<sup>19</sup> with additional criteria added to make the adaptation specific to monitoring.  
39  
40 The Jadad score assesses studies based on their design (randomized and blinded) and their reporting  
41  
42 (all patients accounted for), with a maximal score of 5 (high quality) and a low score of 0 (low quality).  
43  
44 Additional data included here were endpoint definitions, patient population, hospital location at which  
45  
46 patients underwent sedation, and the staff responsible for monitoring. In line with the Jadad score,  
47  
48 items related to trial design could score up to twice as highly as items relating to trial reporting. The  
49  
50 reporting of the inclusion/exclusion criteria and endpoint definitions scored one point each, and  
51  
52 reporting the location of sedation, and the monitoring staff scored half-point point each, making the  
53  
54 maximal score 8 (high quality). For the purposes of analyzing study quality, studies with scores of 0–  
55  
56  
57  
58  
59  
60



1  
2  
3 5.5 were considered to be low quality, while studies scoring 6.0–8.0 were designated as high-quality  
4  
5 studies.

6  
7 Risk of bias in results was evaluated independently from the quality assessment through the  
8  
9 declaration of funding sources and conflicts of interest. If the study was funded by industry then the  
10  
11 study scored 2, any conflicts of interest declared relating to industry funding outside of the current  
12  
13 research publication scored 1. A study with low potential for bias, therefore, would have a score of 0. A  
14  
15 high potential for bias was defined as a score of 3, while a score of 1–2 was considered to indicate  
16  
17 moderate potential for bias. The absence of industry funding was not taken to signify an absence of  
18  
19 bias, but the presence of industry funding or conflicts of interest was assumed to be an indicator of  
20  
21 bias.<sup>20</sup>  
22  
23

## 24 25 **Analysis**

26  
27 Data extraction, initial data consolidation and summary statistics were performed in Microsoft Excel.  
28  
29 Data for each endpoint were subsequently entered into Review Manager 5.3.4 for results synthesis.<sup>21</sup>  
30  
31 Heterogeneity of data was evaluated using  $\text{Chi}^2$  and  $I^2$  statistics presented by Review Manager 5.3.4,  
32  
33 with  $I^2$  further categorized by the tentative Higgins *et al.* heterogeneity categories of: low, moderate  
34  
35 and high.<sup>22</sup> The meta-analysis performed calculated the mean intervention effect across all eligible  
36  
37 studies using (after analysis of heterogeneity) a random effects model as described by DerSimonian  
38  
39 and Laird.<sup>23</sup> An estimate of between-study variation was provided by the Mantel-Haenszel  
40  
41 methodology.<sup>24</sup> The main outcome reported for each endpoint is the pooled mean risk ratio (RR), with  
42  
43 the pooled mean odds ratio (OR) also presented. In both cases, the 95% confidence interval is  
44  
45 specified to allow assessment of result significance.  
46  
47

48  
49 Sensitivity analyses were specified *a priori* and the tested conditions were: (1) inclusion of high-quality  
50  
51 studies only, (2) inclusion of only moderate sedation, (3) inclusion of only studies with low risk of bias,  
52  
53 (4) inclusion of only studies based in the US, (5) inclusion of only studies based in Europe, (6) exclusion  
54  
55 of pediatric data, (7) exclusion of gender-specific studies, (8) exclusion of data in patients <30 years of  
56  
57  
58  
59  
60

1  
2  
3 age. No formal statistical comparisons were made between sensitivity analyses, and intervention  
4  
5 effects were not calculated for the excluded studies, thereby mitigating the introduction of type 1  
6  
7 error into the analysis.  
8

### 9 10 **Patient involvement**

11  
12 No patients, service users, carers or lay people were involved in the design or conduct of this study.  
13  
14 Outcome measures were all related to patient safety during PSA, but were not developed based on an  
15  
16 explicit elicitation of patient priorities, experience, and preferences.  
17  
18

## 19 20 **RESULTS**

21  
22 Literature searches of PubMed, the Cochrane Library and EMBASE returned 385, 87, and 804 articles,  
23  
24 respectively. After removal of 270 duplicates (62 Cochrane, 208 EMBASE), 1,006 articles remained for  
25  
26 abstract screening. Although reasons for exclusion varied (Supplementary Table 2), the two  
27  
28 independent reviewers agreed upon a total of 24 articles to be retained for full-text review (Cohen's  
29  
30 kappa, 1.0). Eleven articles were excluded on full-text review (Supplementary Figure 2) because they:  
31  
32 reported duplicate data (n=5), did not report patient safety data (n=3), did not include sedation (n=2),  
33  
34 or compared two different capnography monitors (n=1). The 13 articles included for analysis are  
35  
36 presented in Table 1 and included data on 14 patient groups (one study, published by Mehta *et al.*,  
37  
38 provided separate data on colonoscopy and esophagogastroduodenoscopy).<sup>25</sup> All studies reported  
39  
40 desaturation endpoints, although the definition did vary by study (Supplementary Table 3). Other  
41  
42 endpoints were heterogeneously reported, but were in most cases reported by  $\geq 3$  studies making  
43  
44 meta-analysis feasible as per the pre-defined protocol. Results reported are from random-effects  
45  
46 models unless otherwise stated. Results for hypotension and use of supplemental oxygen are  
47  
48 provided in the Supplement.  
49  
50

### 51 52 53 **Mild desaturation**

54  
55  
56  
57  
58  
59  
60

1  
2  
3 All studies (Table 1) reported mild desaturation, with the definition varying from an oxygen saturation  
4 (SpO<sub>2</sub>) of <95% to <90% for ≥15 seconds.<sup>5,6,25,26,27,28,29,30,31,32,33,34,35</sup> There was evidence of heterogeneity  
5 (I<sup>2</sup> = 50%, moderate) in the primary analysis. Results indicated that capnography significantly reduced  
6 the incidence of mild desaturation (RR 0.77, 95% CI 0.67–0.89; OR = 0.67, 95% CI 0.55–0.82; Figure 1).  
7  
8 The odds of a mild desaturation event were reduced by over 30% when capnography monitoring is  
9 used, compared with no use of capnography. If only high-quality studies (n=7, 8 populations) were  
10 included (Supplementary Figure 3), there was evidence of heterogeneity (I<sup>2</sup> = 61%, moderate) but the  
11 outcome did not differ: RR 0.75 (95% CI 0.62–0.92; OR 0.63, 95% CI 0.48–0.83). Using exclusively  
12 studies with equivalent definitions of mild desaturation (<90%, n=8, 9 populations), evidence of  
13 heterogeneity (I<sup>2</sup> = 57%, moderate) was still present; the RR estimated from these studies was 0.76  
14 (95% CI 0.65–0.89; OR 0.64, 95% CI 0.51–0.80).  
15  
16  
17  
18  
19  
20  
21  
22  
23  
24  
25  
26

### 27 **Severe desaturation**

28  
29 Seven studies, of which four were classified as high quality, reported severe desaturation.<sup>5,25,27–30,34</sup> All  
30 but one of the studies defined severe desaturation as SpO<sub>2</sub> </≤85%. The analysis for this endpoint  
31 was aligned with the significant reduction in the odds of mild desaturation with the inclusion of  
32 capnography, with a RR of 0.59 (95% CI 0.43–0.81) and OR of 0.55 (95% CI 0.38–0.78). As with mild  
33 desaturation, there was evidence of heterogeneity (I<sup>2</sup> = 47%, moderate).  
34  
35  
36  
37  
38  
39

40 Synthesizing estimates from high-quality studies supported the analysis of all studies, the RR (0.57  
41 95% CI 0.36–0.92) and OR of 0.53 (95% CI 0.31–0.89) reducing by 0.02 and the confidence intervals  
42 widening (Supplementary Figure 4). There was moderate heterogeneity between studies (I<sup>2</sup> = 64%,  
43 moderate). Focusing on the six studies reporting an endpoint of SpO<sub>2</sub> </≤85%, there was moderate  
44 heterogeneity and the RR was estimated at 0.56 (95% CI 0.41–0.78). Overall, a 40% reduction in the  
45 incidence of severe desaturation events would be expected with the use of capnography monitoring  
46 relative to standard of care.  
47  
48  
49  
50  
51  
52  
53  
54

### 55 **Bradycardia**

1  
2  
3 Six studies, three of high-quality, reported bradycardia outcomes.<sup>25,28–30,33,34</sup> The definition of  
4  
5 bradycardia (heart rate <50 beats/minute) was consistent among five of the six trials and there was no  
6  
7 evidence of heterogeneity between the studies ( $I^2 = 0\%$ , low). In four studies, the incidence of  
8  
9 bradycardia was higher in the capnography arm compared with the control arm and overall,  
10  
11 capnography monitoring was associated with a non-significant increase in bradycardia (RR 1.15, 95%  
12  
13 CI 0.89–1.48; OR 1.16, 95% 0.88–1.54) and outcomes were not affected by the inclusion of only high-  
14  
15 quality studies or only studies with low risk of bias (Supplementary Figure 7).

### 16 17 18 **Apnea**

19  
20 Apnea was less widely reported or reported in combination with disordered respiration. Comparable  
21  
22 endpoints were reported in five studies, of which three were high quality.<sup>5,6,25,33,34</sup> There was  
23  
24 substantial heterogeneity in the apnea outcomes ( $I^2 = 92\%$ , high) and the analysis yielded a non-  
25  
26 significant RR of 1.17 (95% CI 0.72–1.89). In an analysis including exclusively high-quality studies, the  
27  
28 RR favored capnography but remained non-significant at 0.89 (95% CI 0.64–1.23; Supplementary  
29  
30 Figure 8).

31  
32  
33  
34 There was one clear outlier in the apnea analysis, with data from Klare *et al.* 2016 reporting a RR of  
35  
36 11.71 (95% CI 5.30–25.90).<sup>34</sup> Apnea in this study was undefined for the standard of care arm, but in the  
37  
38 capnography arm the apnea criterion was the absence of exhaled CO<sub>2</sub> for  $\geq 15$  seconds. Different  
39  
40 criteria between trial arms may explain the large difference in detected apnea, and capnography  
41  
42 would be expected to detect apnea earlier than standard of care monitoring. Excluding this study from  
43  
44 the analysis resulted in a RR of 0.85 (95% CI 0.65–1.12; OR 0.73, 95% CI 0.43–1.24).

### 45 46 47 **Assisted ventilation**

48  
49 Only one study reported "respiratory failure", which was treated with assisted bag-mask ventilation.<sup>28</sup>  
50  
51 In contrast, the number of studies (n=6) reporting assisted and/or bag-mask ventilation was sufficient  
52  
53 to perform a meta-analysis of this endpoint as a surrogate for respiratory failure.<sup>5,28,29,31,32,34</sup> Due to the  
54  
55 low number of events, a Peto fixed-effects odds-ratio model was used to assess this endpoint.  
56  
57  
58  
59  
60

1  
2  
3 Analysis found no evidence of heterogeneity ( $I^2 = 0\%$ , low) and demonstrated a significant reduction  
4  
5 in assisted ventilation with capnography monitoring (OR 0.47, 95% CI 0.23–0.95). In every case, the  
6  
7 need to provide assisted ventilation was lower in the capnography arm compared with the control arm  
8  
9 (Figure 2). Three studies were of high-quality and had a low risk of bias, meta-analysis of these studies  
10  
11 gave an OR of 0.56 (95% CI 0.27–1.20). Three studies specified assisted ventilation as bag-mask  
12  
13 ventilation, and for this subset of studies the OR was 0.56 (95% CI 0.26–1.25).  
14  
15

### 16 **Sensitivity analyses**

17  
18 A series of sensitivity analyses were conducted in which the studies included in the estimation of the  
19  
20 RR and OR were varied. The results of these analyses are presented in Table 2 and show that results  
21  
22 were generally robust to the studies included for data synthesis. There were limited data available to  
23  
24 assess the impact of capnography monitoring during moderate sedation.  
25  
26  
27

## 28 **DISCUSSION**

29  
30 The findings of this meta-analysis of recent RCTs comparing visual assessment of ventilation and pulse  
31  
32 oximetry monitoring with and without capnography during PSA showed that the odds of oxygen  
33  
34 desaturation and assisted ventilation events were significantly reduced with the use of capnography.  
35  
36 Other endpoints that could be affected by capnography monitoring were also considered but no  
37  
38 significant differences were detected. Of potential clinical importance, was the consistency of data  
39  
40 across multiple high-quality clinical trials reporting a reduced incidence of assisted ventilation with  
41  
42 capnography monitoring. No endpoints assessed in the meta-analysis indicated significant patient  
43  
44 safety concerns with capnography.  
45  
46  
47

48  
49 Physician concerns for patient safety often focus on mortality and severe morbidity. Using the need  
50  
51 for assisted ventilation as a proxy, there was evidence that severe morbidity may differ between  
52  
53 control and capnography arms in the present meta-analysis. The incidence of mortality and severe  
54  
55 morbidity events during nurse-administered PSA has been reported to be 1 event per 303 procedures  
56  
57 (0.33%).<sup>36</sup> Taking this value and using the assumption that capnography could prevent 50% of events  
58  
59  
60

1  
2  
3 (in line with the estimate from our analysis) and employing trial-size estimation methodology reported  
4  
5 by Zhong (2009) showed that 27,726 patients would be required to demonstrate statistical  
6  
7 superiority.<sup>37</sup> Switching to an assumption that capnography would prevent 10% of events, the  
8  
9 required enrollment would be >900,000 patients. The feasibility of performing such a superiority trial  
10  
11 is low, leaving meta-analyses such as the present study as the only viable alternative for determining  
12  
13 the impact of capnography on such critical patient endpoints.  
14

15  
16 The analysis is timely given the ongoing debate as to whether the addition of capnography to patient  
17  
18 monitoring during PSA adds value.<sup>17</sup> Without doubt, potential technical and financial burdens have  
19  
20 further limited adoption of capnography monitoring in various clinical settings.<sup>15,17</sup> Nevertheless, it is  
21  
22 important to recognize that patient safety benefits may offset a number of these concerns if the  
23  
24 outcomes are applicable to current medical practice.<sup>38</sup> In this regard, the 13 trials identified in the  
25  
26 present analysis were all recent, with the first published study identified in 2006. The data used in the  
27  
28 meta-analysis therefore represents modern medical practice, and provides consistent evidence of  
29  
30 improvements in patient safety with the use of capnography monitoring.  
31  
32

33  
34 These findings further substantiate a previously published meta-analysis (Waugh *et al.*), which found  
35  
36 that capnography monitoring was more likely to detect adverse events, but was faulted for large  
37  
38 endpoint heterogeneity.<sup>16</sup> In the present meta-analysis, we focused on identifying high-quality studies,  
39  
40 and on maintaining consistent definitions across all included studies. The results show that the  
41  
42 addition of capnography to patient monitoring during PSA results in increased patient safety, with  
43  
44 significant reductions in mild and severe levels of oxygen desaturation, as well as the need for assisted  
45  
46 ventilation.  
47

48  
49 A recent meta-analysis by Conway *et al.* reported a significant benefit with capnography during  
50  
51 colonoscopy only with respect to hypoxemia. However, the study identified and screened only a  
52  
53 fraction of the literature included in the present analysis (388 papers in Conway *et al.*, compared with  
54  
55 1,006 papers in the current study) and retrieved fewer randomized controlled trials (6 versus 13). In  
56  
57 addition, Conway *et al.* excluded two trials in which an independent observer monitored capnography  
58  
59  
60

1  
2  
3 output for all patients, and signaled to the attending physician when respiratory compromise was  
4 identified with capnography either immediately (intervention) or after a specified delay (control).<sup>56</sup>  
5  
6  
7 The rationale for this study design was to prevent unnecessary patient harm while avoiding  
8  
9 investigator bias. Based on our understanding, the two trials excluded in the Conway *et al.* analysis  
10  
11 were the only studies in the literature that could be considered fully blinded. Among the other studies,  
12  
13 the attending physician would have been aware of study arm assignment.<sup>27,29,32</sup>  
14  
15

16  
17 As with other major assessment tools such as Delphi, Consort, and the Cochrane risk of bias tool,  
18  
19 blinding is an integral part of the Jadad score used in the present analysis.<sup>19,39</sup> The trials excluded from  
20  
21 the Conway *et al.* analysis are both considered to be "high quality" in the present analysis, driven in  
22  
23 part by the inclusion of blinding in the scoring methodology. Other included trials, though potentially  
24  
25 more representative of current clinical practice, are open to operator bias, the consequences of which  
26  
27 were demonstrated in 2012 by Veerus *et al.*<sup>40</sup>  
28

29  
30 The Jadad score is a widely used score of clinical study quality.<sup>41</sup> In the present analysis, the scale was  
31  
32 modified to make it more applicable to monitoring studies by including parameters such as  
33  
34 monitoring staff and procedure location. One potential limitation of the present quality appraisal  
35  
36 approach was the lack of validation of the modifications to the Jadad score; however, as might have  
37  
38 been anticipated, the modified score does significantly correlate with the raw Jadad score (adjusted  
39  
40  $R^2 = 0.93$ ,  $p < 0.01$ ). Furthermore, analysis of mild desaturation data using a mixed model that took the  
41  
42 Jadad score or the modified Jadad score as a covariate, found no significant difference between  
43  
44 models and the heterogeneity accounted for (approximately 50% for both models).  
45  
46

47  
48 Another ongoing debate in PSA concerns the clinical importance of seemingly minor endpoints, such  
49  
50 as mild desaturation (oxygenation <90% for 15 seconds). Although such endpoints have traditionally  
51  
52 been considered transient and perhaps clinically insignificant during PSA, several recent studies of  
53  
54 common intraoperative events have suggested that mild desaturation may have more impact on  
55  
56 post-surgical outcomes than has previously been recognized.<sup>42</sup> For example, Dunham *et al.* looked  
57  
58 retrospectively and determined that surgical patients who experienced perioperative  
59  
60

1  
2  
3 hypoxemia/desaturation had a significant increase in their length of hospital stay (+2.0 days,  
4  
5  $p < 0.0001$ ).<sup>43</sup> In turn, the impact of transient desaturation during PSA in terms of patient outcomes and  
6  
7 quality of life may yet be of importance but remains to be determined.  
8  
9

10 Over all the studies included in the analysis, there was one report of patient mortality, in the standard  
11  
12 of care arm of the trial presented by Klare *et al.*, 2016.<sup>34</sup> Only the largest trials reported any  
13  
14 requirement for assisted/bag-mask ventilation, which is used as an intervention and thereby a proxy  
15  
16 measure for potentially life-threatening events. Although it is generally accepted that much larger  
17  
18 studies would be useful to assess whether or not capnography monitoring impacts patient major  
19  
20 morbidity and mortality, there has been no determination of the trial size that would be required.  
21  
22 Power calculations suggest such a large randomized controlled trial is likely to be impractical.  
23  
24

25 For healthcare providers, the most significant finding may be the consistency of data surrounding  
26  
27 assisted ventilation and severe oxygen desaturation with capnography. Two closed claim reviews both  
28  
29 found that inadequate oxygenation/ventilation was the most frequent event leading to a claim related  
30  
31 to PSA outside the operating room.<sup>44,45</sup> The potential cost burden is demonstrated by the median cost  
32  
33 of a claim settled being USD 330,000 (in 2007 USD).<sup>44</sup> The authors reported that better monitoring  
34  
35 would have reduced the number of claims.<sup>44</sup> A similar message was returned following the fourth  
36  
37 National Audit Project in the UK, which analyzed major complications of airway management in the  
38  
39 National Health Service and determined that capnography monitoring could have led to earlier  
40  
41 identification of airway obstruction, potentially preventing 74% of death or neurological injury  
42  
43 cases.<sup>46,47</sup> Studies included in the present meta-analysis reported that disordered ventilation as  
44  
45 detected by capnography preceded desaturation events by 30 to 60 seconds.  
46  
47  
48

49 The meta-analysis did find an increase in bradycardia with capnography monitoring that was non-  
50  
51 significant. However, in each of the trials reporting higher incidence the patients in the capnography  
52  
53 arm had larger doses and increased use of multiple agents for inducing PSA. Such confounding is  
54  
55 plausible, may not be unusual, and was discussed as possible factor in the trial outcomes by  
56  
57 Campbell *et al.* 2016.<sup>48</sup> All other findings of the current analysis were in line with expectations around  
58  
59  
60



1  
2  
3 the potential benefits of capnography; as further substantiated by the results of our meta-analysis,  
4  
5 earlier identification of respiratory compromise appears to result in more timely intervention and  
6  
7 prevention of its escalation into patient harm.  
8

9  
10 As with all data synthesis projects, the present study is only as accurate and reliable as the data  
11  
12 underlying it. In the literature, there are examples of newly-published clinical trials that do not align  
13  
14 with the results of published meta-analyses, and meta-analysis results changing on the publication of  
15  
16 new data.<sup>49,50</sup> The systematic nature of study identification and inclusion criteria in the present analysis  
17  
18 was designed to identify all available literature and provide the most robust estimates of intervention  
19  
20 effect. However, the included studies came from a variety of hospital settings, in which the rate of  
21  
22 patient safety events might vary. This is apparent in the clinical trial results presented by Mehta *et al.*,  
23  
24 where colonoscopy and esophagogastroduodenoscopy were assessed independently due to  
25  
26 differences in outcomes.<sup>25</sup> Analyses for particular settings were undertaken, but were then limited by  
27  
28 reduced data availability. In total, this analysis represented 5,460 patients (control 2,755 and  
29  
30 capnography 2,705) over 13 studies. Between trials, the number of patients enrolled varied between  
31  
32 132 and 986. Notably, of the six studies that identified rare outcomes, such as differences in use of  
33  
34 assisted ventilation, five enrolled >500 patients.  
35  
36

## 37 38 39 **CONCLUSIONS**

40  
41 The results of this comprehensive meta-analysis of clinical trials provide clear and consistent evidence  
42  
43 of decreased respiratory compromise when capnography monitoring is used during procedural  
44  
45 sedation and analgesia (PSA). Specifically, the analysis identified a statistically significant and clinically  
46  
47 meaningful reduction in mild and severe oxygen desaturation, as well as in assisted ventilation. Large,  
48  
49 well designed, randomized controlled trials to provide direct links between use of capnography and  
50  
51 reduction in patient harm may not be feasible. In turn, calls for this type of primary evidence may  
52  
53 delay adoption of capnography monitoring during PSA as a valuable tool for early intervention and  
54  
55 improved patient safety.  
56  
57  
58  
59  
60

1  
2  
3  
4  
5 **Word Count** 5,233  
6  
7  
8  
9

## 10 **AUTHOR CONTRIBUTIONS**

11  
12  
13  
14 MM formulated the research question; RFP and RS devised the search strategy and data extraction  
15 protocol, which was critically reviewed and revised by MM, JRL and MMRFS; RFP and RS then  
16 conducted the literature searches, screening, data extraction, and meta-analysis, and co-wrote the  
17 manuscript; MM, JRL and MMRFS critically reviewed the manuscript and made substantive revisions  
18 prior to submission.  
19  
20  
21  
22  
23  
24

## 25 **DATA SHARING STATEMENT**

26  
27  
28  
29 All data used to derive the outcomes presented in the study are documented in the manuscript and  
30 supplementary materials. No additional data are therefore available.  
31  
32  
33

## 34 **PUBLICATION RIGHTS**

35  
36  
37 The Corresponding Author has the right to grant on behalf of all authors and does grant on behalf of  
38 all authors, an exclusive license (or non-exclusive for government employees) on a worldwide basis to  
39 the BMJ Publishing Group Ltd to permit this article (if accepted) to be published in BMJ editions and  
40 any other BMJ PGL products and sublicences such use and exploit all subsidiary rights, as set out in our  
41 licence.  
42  
43  
44  
45  
46  
47  
48

## 49 **TRANSPARENCY DECLARATION**

50  
51  
52 The lead author (the manuscript's guarantor) affirms that the manuscript is an honest, accurate, and  
53 transparent account of the study being reported. No important aspects of the study have been  
54  
55  
56  
57  
58  
59  
60

1  
2  
3 omitted and any discrepancies from the study as planned (and, if relevant, registered) have been  
4  
5 explained.  
6  
7

## 8 **ETHICAL APPROVAL**

### 9

10  
11 No ethical approval was required for the study as all data were derived from published data; neither  
12  
13 animal nor human subjects were enrolled as part of the present study.  
14  
15

## 16 **FUNDING AND STUDY SPONSOR ROLE**

### 17

18  
19 This study was funded by Medtronic plc following a research proposal submitted by Ossian Health  
20  
21 Economics and Communications GmbH. The sponsor reviewed the final manuscript prior to  
22  
23 submission, but submission was not contingent on a particular outcome of the analysis.  
24  
25

## 26 **FINANCIAL AND COMPETING INTEREST DISCLOSURE**

### 27

28  
29 All authors have completed the Unified Competing Interest forms at [www.icmje.org/coi\\_disclosure.pdf](http://www.icmje.org/coi_disclosure.pdf)  
30  
31 (available on request from the corresponding author) and declare:  
32  
33

- 34 • Michael Mestek is a full-time employee of Medtronic plc.
- 35 • Richard F Pollock is a full-time employee of Ossian Health Economics and Communications GmbH,  
36  
37 which received research and consultancy fees from Medtronic plc. to conduct the literature review  
38  
39 and meta-analysis and prepare the manuscript.  
40  
41
- 42 • Rhodri Saunders was a full-time employee of Ossian Health Economics and Communications  
43  
44 GmbH at the time of performing the meta-analysis and is currently a director of Coreva Scientific  
45  
46 GmbH & Co. KG.  
47  
48
- 49 • Michel MRF Struys's research group/department received grants and funding from The Medicines  
50  
51 Company (USA), Masimo (USA), Fresenius (Germany), Acacia Design (The Netherlands), Medtronic  
52  
53 (USA) and honoraria from The Medicines Company (USA), Masimo (USA), Fresenius (Germany),  
54  
55 Baxter (USA), Medtronic (USA), Demed Medical (Belgium).  
56  
57  
58  
59  
60

- 1
  - 2
  - 3
  - 4
  - 5
  - 6
  - 7
  - 8
  - 9
  - 10
  - 11
  - 12
  - 13
  - 14
  - 15
  - 16
  - 17
  - 18
  - 19
  - 20
  - 21
  - 22
  - 23
  - 24
  - 25
  - 26
  - 27
  - 28
  - 29
  - 30
  - 31
  - 32
  - 33
  - 34
  - 35
  - 36
  - 37
  - 38
  - 39
  - 40
  - 41
  - 42
  - 43
  - 44
  - 45
  - 46
  - 47
  - 48
  - 49
  - 50
  - 51
  - 52
  - 53
  - 54
  - 55
  - 56
  - 57
  - 58
  - 59
  - 60
- Jenifer R Lightdale has served as a consultant for Medtronic and Norgine, and has received speaker honorarium from Mead-Johnson and Perrigo.

For peer review only

## TABLES AND FIGURES

Table 1 Included studies reporting endpoints of interest

| Study (reference)                 | Country     | Trial dates    | Modified Jadad † | Potential for bias | Hospital setting               | Depth of sedation | Sedative            | Monitoring staff                           | Oxygen at baseline    | N (control, Cap) |
|-----------------------------------|-------------|----------------|------------------|--------------------|--------------------------------|-------------------|---------------------|--------------------------------------------|-----------------------|------------------|
| Beitz 2012 <sup>28</sup>          | Germany     | Feb-10, Jan-11 | 5.5              | High: 3            | Colonoscopy                    | “adequate”        | Propofol            | Not specified                              | 2 L/minute            | 757 (374, 383)   |
| Deitch 2010 <sup>26</sup>         | US          | Nov-06, Feb-08 | 5.5              | Low: 0             | Emergency department           | Moderate          | Propofol            | Not specified                              | 3 L/minute            | 132 (64, 68)     |
| Friedrich-Rust 2014 <sup>29</sup> | Germany     | Jun-12, May-13 | 6                | Low: 0             | Colonoscopy                    | Deep              | Propofol+           | Anesthesiologist or sedation-trained nurse | 2 L/minute            | 533 (266, 267)   |
| Langhan 2015 <sup>31</sup>        | US          | Sep-11, Jan-13 | 6                | Low: 0             | Pediatric emergency department | NA                | Ketamine, midazolam | “Treating staff”                           | None                  | 154 (77, 77)     |
| Lightdale 2006 <sup>6</sup>       | US          | Dec-03, Nov-04 | 8                | Low: 0             | Endoscopy                      | Moderate          | Fentanyl, midazolam | Independent observer                       | 2 L/minute            | 163 (80, 83)     |
| Qadeer 2009 <sup>5</sup>          | US          | Jan-07, May-08 | 7.5              | Moderate: 1        | ERCP and EUS                   | NA                | Midazolam+          | Independent observer                       | None                  | 247 (124, 123)   |
| Slagelse 2013 <sup>32</sup>       | Denmark     | Sep-10, Jan-11 | 6                | Low: 0             | Endoscopy                      | NA                | Propofol            | Sedation-trained nurse                     | 2-3 L/minute          | 540 (277, 263)   |
| van Loon 2014 <sup>27</sup>       | Netherlands | Apr-10, Jan-11 | 5                | Low: 0             | Gynecology                     | Deep              | Propofol            | Medical team providing sedation            | None                  | 415 (209, 206)   |
| Zongming 2014 <sup>30</sup>       | China       | Nov-10, May-13 | 6                | Low: 0             | Abortion                       | Deep              | Propofol            | Anesthesiologist                           | 3 L/minute            | 700 (359, 341)   |
| Campbell 2016                     | Canada      | Apr-06, Apr-12 | 5                | Moderate: 2        | Emergency department           | NA                | Physician’s choice  | Paramedic acute care practitioner          | 98.7% received oxygen | 986 (501, 485)   |
| Klare 2016 <sup>34</sup>          | Germany     | Feb-10, Oct-11 | 5.5              | Moderate: 1        | ERCP                           | Deep              | Midazolam and       | Physician not                              | 2 L/minute            | 238 (117, 121)   |

|                                  |         |                |     |         |             |            |                                        |                      |            |                |
|----------------------------------|---------|----------------|-----|---------|-------------|------------|----------------------------------------|----------------------|------------|----------------|
|                                  |         |                |     |         |             |            | propofol                               | performing procedure |            |                |
| Mehta 2016 (colon) <sup>25</sup> | US      | Dec-13, Jan-15 | 8   | Low: 0  | Colonoscopy | Moderate   | Fentanyl or meperidine, plus midazolam | Independent observer | None       | 231 (114, 117) |
| Mehta 2016 (EGD) <sup>25</sup>   | US      | Dec-13, Jan-15 | 8   | Low: 0  | EGD         | Moderate   | Fentanyl or meperidine, plus midazolam | Independent observer | None       | 209 (108, 101) |
| Riphaus 2016 <sup>33</sup>       | Germany | Jun-10, Nov-11 | 5.5 | High: 3 | EUS         | "adequate" | Midazolam and propofol                 | Independent observer | 2 L/minute | 170 (87, 83)   |

† Higher scores indicate higher quality studies. In the present analysis, a score of 6.0–8.0 was designated as high quality.

+, in combination with multiple other agents; BZP, benzodiazepine; Cap, Capnography (arm); EGD, Esophagogastroduodenoscopy; ERCP, Endoscopic retrograde cholangiopancreatography; EUS, Endoscopic ultrasonography

1  
2  
3 **Figure 1** **Severe and mild desaturation are significantly reduced with capnography**  
4  
5 **monitoring**  
6

7  
8 The risk ratios for the endpoints of mild desaturation (A) and severe desaturation (B) are presented. CI,  
9  
10 Confidence interval; M-H, Mantel-Haenszel

11  
12  
13  
14 **Figure 2** **The need for assisted ventilation is reduced with capnography monitoring**  
15

16  
17 ]The odds ratios for the assisted ventilation endpoint are presented for all studies (A), high quality studies (B),  
18  
19 studies with low risk of bias (C), and studies with the end point specified as bag-mask ventilation (D). CI,  
20  
21 Confidence interval; M-H, Mantel-Haenszel  
22  
23  
24  
25  
26  
27  
28  
29  
30  
31  
32  
33  
34  
35  
36  
37  
38  
39  
40  
41  
42  
43  
44  
45  
46  
47  
48  
49  
50  
51  
52  
53  
54  
55  
56  
57  
58  
59  
60

**Table 2** Sensitivity analyses around the primary analyses

| Scenario                             | Desaturation, mild          | Desaturation, severe        | Apnea                       | Bradycardia                 | Hypotension                 | Assisted ventilation | Supplemental oxygen         |
|--------------------------------------|-----------------------------|-----------------------------|-----------------------------|-----------------------------|-----------------------------|----------------------|-----------------------------|
| <b>Base case (all studies)</b>       | <b>0.77</b><br>[0.67, 0.89] | <b>0.59</b><br>[0.43, 0.81] | <b>1.17</b><br>[0.72, 1.89] | <b>1.16</b><br>[0.88, 1.54] | <b>1.02</b><br>[0.78, 1.33] | 0.47<br>[0.23, 0.95] | <b>0.93</b><br>[0.75, 1.15] |
| High quality studies                 | 0.75<br>[0.62, 0.92]        | 0.57<br>[0.36, 0.92]        | 0.89<br>[0.64, 1.23]        | 1.26<br>[0.80, 1.99]        | 0.97<br>[0.73, 1.30]        | 0.56<br>[0.27, 1.20] | 0.98<br>[0.79, 1.23]        |
| Moderate sedation                    | 0.80<br>[0.60, 1.07]        | -                           | 0.99<br>[0.69, 1.42]        | -                           | -                           | -                    | -                           |
| US only                              | 0.80<br>[0.64, 0.99]        | 0.59<br>[0.26, 1.30]        | 0.89<br>[0.64, 1.23]        | -                           | 1.04<br>[0.57, 1.88]        | -                    | -                           |
| Europe only                          | 0.77<br>[0.63, 0.96]        | 0.61<br>[0.44, 0.84]        | 2.83<br>[0.12, 67.30]       | 1.18<br>[0.86, 1.61]        | 0.90<br>[0.66, 1.24]        | 0.49<br>[0.23, 1.03] | 0.91<br>[0.67, 1.25]        |
| Studies with potential bias excluded | 0.78<br>[0.64, 0.95]        | 0.65<br>[0.37, 1.14]        | 0.99<br>[0.69, 1.42]        | 1.26<br>[0.80, 1.99]        | 0.92<br>[0.68, 1.25]        | 0.56<br>[0.27, 1.20] | 1.16<br>[0.95, 1.41]        |
| Studies in pediatrics excluded       | 0.78<br>[0.67, 0.89]        | 0.59<br>[0.43, 0.81]        | 1.29<br>[0.75, 2.23]        | 1.16<br>[0.88, 1.54]        | 1.02<br>[0.78, 1.33]        | 0.47<br>[0.23, 0.95] | 0.92<br>[0.74, 1.14]        |
| Gender-specific studies excluded     | 0.76<br>[0.66, 0.89]        | 0.59<br>[0.41, 0.84]        | 1.17<br>[0.72, 1.89]        | 1.18<br>[0.84, 1.65]        | 1.03<br>[0.75, 1.41]        | 0.49<br>[0.23, 1.03] | 0.84<br>[0.68, 1.03]        |
| Studies with mean age >30 years      | 0.75<br>[0.65, 0.87]        | 0.56<br>[0.41, 0.78]        | 1.29<br>[0.75, 2.23]        | 1.16<br>[0.88, 1.54]        | 1.02<br>[0.78, 1.33]        | 0.47<br>[0.23, 0.95] | 0.87<br>[0.71, 1.07]        |

The reported treatment effect is the relative risk (RR) [95% confidence interval], except for assisted ventilation where the peto odds ratio (OR) [95% confidence interval] is used.

CI, confidence interval; US, United States



## REFERENCES

- <sup>1</sup> Sharma VK, Nguyen CC, Crowell MD, Lieberman DA, de Garmo P, Fleischer DE. A national study of cardiopulmonary unplanned events after GI endoscopy. *Gastrointest Endosc.* 2007;66:27–34.
- <sup>2</sup> Gangi S, Saidi F, Patel K, Johnstone B, Jaeger J, Shine D. Cardiovascular complications after GI endoscopy: occurrence and risks in a large hospital system. *Gastrointest Endosc.* 2004;60:679–85.
- <sup>3</sup> Erden IA, Pamuk AG, Akinci SB, Koseoglu A, Aypar U. Comparison of two ketamine-propofol dosing regimens for sedation during interventional radiology procedures. *Minerva anesthesiologica* 2010;76:260–5.
- <sup>4</sup> Lichtenstein DR, Jagannath S, Baron TH, *et al.* Sedation and anesthesia in GI endoscopy. *Gastrointest Endosc.* 2008;68:205–16.
- <sup>5</sup> Qadeer MA, Vargo JJ, Dumot JA, *et al.* Capnographic monitoring of respiratory activity improves safety of sedation for endoscopic cholangiopancreatography and ultrasonography. *Gastroenterology.* 2009;136:1568–76.
- <sup>6</sup> Lightdale JR, Goldmann DA, Feldman HA, Newburg AR, DiNardo JA, Fox VL. Microstream capnography improves patient monitoring during moderate sedation: a randomized, controlled trial. *Pediatrics.* 2006;117:e1170–8.
- <sup>7</sup> Cotton PB, Eisen GM, Aabakken L, *et al.* A lexicon for endoscopic adverse events: report of an ASGE workshop. *Gastrointest Endosc.* 2010;71:446–54.
- <sup>8</sup> Vargo JJ, Cohen LB, Rex DK, Kwo PY. Position statement: nonanesthesiologist administration of propofol for GI endoscopy. *Gastrointest Endosc.* 2009;70:1053–9.
- <sup>9</sup> Qadeer MA, Rocio Lopez A, Dumot JA, Vargo JJ. Risk Factors for Hypoxemia During Ambulatory Gastrointestinal Endoscopy in ASA I-II Patients. *Dig Dis Sci.* 2009;54(5):1035–40.

- 1  
2  
3  
4 <sup>10</sup> Radaelli F, Terruzzi V, Minoli G. Extended/advanced monitoring techniques in gastrointestinal  
5  
6 endoscopy. *Gastrointest Endosc Clin N Am*. 2004;14:335–52.  
7  
8  
9 <sup>11</sup> Kober A, Schubert B, Bertalanffy P, et al. Capnography in non-tracheally intubated emergency  
10  
11 patients as an additional tool in pulse oximetry for prehospital monitoring of respiration. *Anesth*  
12  
13 *Analg*. 2004;98:206–10.  
14  
15 <sup>12</sup> Soto RG, Fu ES, Vila H, Jr., Miguel RV. Capnography accurately detects apnea during monitored  
16  
17 anesthesia care. *Anesth Analg*. 2004;99:379–82.  
18  
19  
20 <sup>13</sup> Thomas PE. What's the latest on carbon dioxide monitoring? *Neonatal Netw*. 2004;23:70–2.  
21  
22  
23 <sup>14</sup> Yildzdas D, Yapcoglu H, Ylmaz HL. The value of capnography during sedation or sedation/analgesia  
24  
25 in pediatric minor procedures. *Pediatr Emerg Care*. 2004;20:162–5.  
26  
27  
28 <sup>15</sup> American Society for Gastrointestinal Endoscopy, American College of Gastroenterology,  
29  
30 Association TAG. Universal adoption of capnography for moderate sedation in adults undergoing  
31  
32 upper endoscopy and colonoscopy has not been shown to improve patient safety or clinical outcomes  
33  
34 and significantly increases costs for moderate sedation. Available from:  
35  
36 <http://www.asge.org/assets/0/71542/71544/90dc9b63-593d-48a9-bec1-9f0ab3ce946a.pdf> Last  
37  
38 accessed April 11, 2016.  
39  
40  
41 <sup>16</sup> Waugh JB, Epps CA, Khodneva YA. Capnography enhances surveillance of respiratory events during  
42  
43 procedural sedation: a meta-analysis. *J Clin Anesth*. 2011;23:189–96.  
44  
45  
46 <sup>17</sup> Cook TM. The winds of change - progress in the implementation of universal capnography.  
47  
48 *Anaesthesia*. 2016;71(4):363–8.  
49  
50  
51 <sup>18</sup> Sourcerer. Covalence Research Ltd, London, UK. Available at <https://sourcerer.pro/>  
52  
53  
54 <sup>19</sup> Jadad AR, Moore RA, Carroll D, et al. Assessing the quality of reports of randomized clinical trials: is  
55  
56 blinding necessary? *Control Clin Trials*. 1996;17(1):1–12.  
57  
58  
59  
60

- 1  
2  
3  
4<sup>20</sup> Lexchin J, Bero LA, Djulbegovic B, Clark O. Pharmaceutical industry sponsorship and research  
5  
6 outcome and quality: systematic review. *BMJ*. 2003;326(7400):1167–70.  
7  
8  
9<sup>21</sup> Review Manager. The Nordic Cochrane Centre, The Cochrane Collaboration, Copenhagen, Denmark.  
10  
11  
12<sup>22</sup> Higgins JP, Thompson SG, Deeks JJ, Altman DG. Measuring inconsistency in meta-analyses. *BMJ*.  
13  
14 2003;327(7414):557–560.  
15  
16<sup>23</sup> DerSimonian R, Laird N. Meta-analysis in clinical trials. *Control Clin Trials*. 1986;7(3):177–88.  
17  
18  
19<sup>24</sup> Mantel N, Haenszel W. Statistical aspects of the analysis of data from retrospective studies of  
20  
21 disease. *Journal of the National Cancer Institute* 1959;22:719–48.  
22  
23  
24<sup>25</sup> Mehta PP, Kochhar G, Albeldawi M, *et al*. Capnographic Monitoring in Routine EGD and  
25  
26 Colonoscopy With Moderate Sedation: A Prospective, Randomized, Controlled Trial. *Am J*  
27  
28 *Gastroenterol* 2016;111:395–404.  
29  
30<sup>26</sup> Deitch K, Miner J, Chudnofsky CR, Dominici P, Latta D. Does end tidal CO2 monitoring during  
31  
32 emergency department procedural sedation and analgesia with propofol decrease the incidence of  
33  
34 hypoxic events? A randomized, controlled trial. *Ann Emerg Med*. 2010;55:258–64.  
35  
36  
37<sup>27</sup> van Loon K, van Rheineck Leyssius AT, van Zaane B, Denteneer M, Kalkman CJ. Capnography during  
38  
39 deep sedation with propofol by nonanesthesiologists: a randomized controlled trial. *Anesth Analg*.  
40  
41 2014;119:49–55.  
42  
43  
44<sup>28</sup> Beitz A, Riphaus A, Meining A, *et al*. Capnographic monitoring reduces the incidence of arterial  
45  
46 oxygen desaturation and hypoxemia during propofol sedation for colonoscopy: a randomized,  
47  
48 controlled study (ColoCap Study). *Am J Gastroenterol*. 2012;107:1205–12.  
49  
50  
51<sup>29</sup> Friedrich-Rust M, Welte M, Welte C, *et al*. Capnographic monitoring of propofol-based sedation  
52  
53 during colonoscopy. *Endoscopy*. 2014;46:236–44.  
54  
55  
56  
57  
58  
59  
60

1  
2  
3  
4 <sup>30</sup> Zongming J, Zhonghua C, Xiangming F. Sidestream capnographic monitoring reduces the incidence  
5  
6 of arterial oxygen desaturation during propofol ambulatory anesthesia for surgical abortion. *Med Sci*  
7  
8 *Monit.* 2014;20:2336–42.  
9

10  
11 <sup>31</sup> Langhan ML, Shabanova V, Li FY, Bernstein SL, Shapiro ED. A randomized controlled trial of  
12  
13 capnography during sedation in a pediatric emergency setting. *Am J Emerg Med.* 2015;33:25–30.  
14

15  
16 <sup>32</sup> Slagelse C, Vilmann P, Hornslet P, Jorgensen HL, Horsted TI. The role of capnography in endoscopy  
17  
18 patients undergoing nurse-administered propofol sedation: a randomized study. *Scand J*  
19  
20 *Gastroenterol.* 2013;48(10):1222–30.  
21

22  
23 <sup>33</sup> Riphaut A, Wehrmann T, Kronshage T, *et al.* Clinical value of the Integrated Pulmonary Index(®)  
24  
25 during sedation for interventional upper GI-endoscopy: A randomized, prospective tri-center study.  
26  
27 *Dig Liver Dis.* 2017;49(1):45–49.  
28

29  
30 <sup>34</sup> Klare P, Reiter J, Meining A, *et al.* Capnographic monitoring of midazolam and propofol sedation  
31  
32 during ERCP: a randomized controlled study (EndoBreath Study). *Endoscopy.* 2016;48(1):42–50.  
33

34  
35 <sup>35</sup> Campbell SG, Magee KD, Zed PJ, *et al.* End-tidal capnometry during emergency department  
36  
37 procedural sedation and analgesia: a randomized, controlled study. *World J Emerg Med. World J*  
38  
39 *Emerg Med.* 2016;7(1):13–8.  
40

41  
42 <sup>36</sup> Guimaraes ES, Campbell EJ, Richter JM. The Safety of Nurse-Administered Procedural Sedation  
43  
44 Compared to Anesthesia Care in a Historical Cohort of Advanced Endoscopy Patients. *Anesth Analg.*  
45  
46 2014;119(2):349–56.  
47

48  
49 <sup>37</sup> Zhong B. How to Calculate Sample Size in Randomized Controlled Trial? *J Thorac Dis.* 2009;1(1):51–  
50  
51 54.  
52

53  
54 <sup>38</sup> Saunders R, Ersilon M, Vargo J. Modeling the costs and benefits of capnography monitoring during  
55  
56 procedural sedation for gastrointestinal endoscopy. *Endosc Int Open.* 2016;4(3):E340–51.  
57  
58  
59  
60

1  
2  
3  
4 <sup>39</sup> Berger VW and Alperson SY. A general framework for the evaluation of clinical trial quality. Rev  
5 Recent Clin Trials. 2009;4(2):79–88.  
6  
7

8  
9 <sup>40</sup> Veerus P, Fischer K, Hakama M, Hemminki E; EPHT Trial. Results from a blind and a non-blind  
10 randomised trial run in parallel: experience from the Estonian Postmenopausal Hormone Therapy  
11 (EPHT) Trial. BMC Med Res Methodol. 2012;12:44.  
12  
13

14  
15 <sup>41</sup> Berger VW, Alperson SY. A general framework for the evaluation of clinical trial quality. Rev Recent  
16 Clin Trials. 2009;4(2):79–88.  
17  
18

19  
20 <sup>42</sup> Ehrenfeld JM, Funk LM, Van Schalkwyk J, Merry AF, Sandberg WS, Gawande A. The incidence of  
21 hypoxemia during surgery: evidence from two institutions. Can J Anaesth. 2010;57(10):888–97.  
22  
23

24  
25 <sup>43</sup> Dunham CM, Hileman BM, Hutchinson AE, Chance EA, Huang GS. Perioperative hypoxemia is  
26 common with horizontal positioning during general anesthesia and is associated with major adverse  
27 outcomes: a retrospective study of consecutive patients. BMC Anesthesiol. 2014;14:43.  
28  
29

30  
31 <sup>44</sup> Metzner J, Posner KL, Domino KB. The risk and safety of anesthesia at remote locations: the US  
32 closed claims analysis. Curr Opin Anaesthesiol. 2009;22(4):502–8.  
33  
34

35  
36 <sup>45</sup> Robbertze R, Posner KL, Domino KB. Closed claims review of anesthesia for procedures outside the  
37 operating room. Curr Opin Anaesthesiol. 2006;19(4):436–42.  
38  
39

40  
41 <sup>46</sup> Cook TM, Woodall N, Harper J, Benger J. Major complications of airway management in the UK:  
42 results of the Fourth National Audit Project of the Royal College of Anaesthetists and the Difficult  
43 Airway Society. Part 2: intensive care and emergency departments. Br J Anaesth. 2011;106:632–42.  
44  
45

46  
47 <sup>47</sup> Cook TM, Woodall N, Frerk C; Fourth National Audit Project. Major complications of airway  
48 management in the UK: results of the Fourth National Audit Project of the Royal College of  
49 Anaesthetists and the Difficult Airway Society. Part 1: anaesthesia. Br J Anaesth. 2011;106(5):632–42.  
50  
51  
52  
53  
54  
55  
56  
57  
58  
59  
60

1  
2  
3  
4 <sup>48</sup> Campbell SG, Magee KD, Zed PJ, *et al.* End-tidal capnometry during emergency department  
5  
6 procedural sedation and analgesia: a randomized, controlled study. *World J Emerg Med.*  
7  
8 2016;7(1):13–8.  
9

10  
11 <sup>49</sup> LeLorier J, Gregoire G, Benhaddad A, Lapierre J, Derderian F. Discrepancies between meta-analyses  
12  
13 and subsequent large randomized, controlled trials. *N Engl J Med.* 1997;337(8):536–42.  
14

15  
16 <sup>50</sup> Trikalinos TA, Churchill R, Ferri M, *et al.* Effect sizes in cumulative meta-analyses of mental health  
17  
18 randomized trials evolved over time. *J Clin Epidemiol.* 2004;57(11):1124–30.  
19  
20  
21  
22  
23  
24  
25  
26  
27  
28  
29  
30  
31  
32  
33  
34  
35  
36  
37  
38  
39  
40  
41  
42  
43  
44  
45  
46  
47  
48  
49  
50  
51  
52  
53  
54  
55  
56  
57  
58  
59  
60

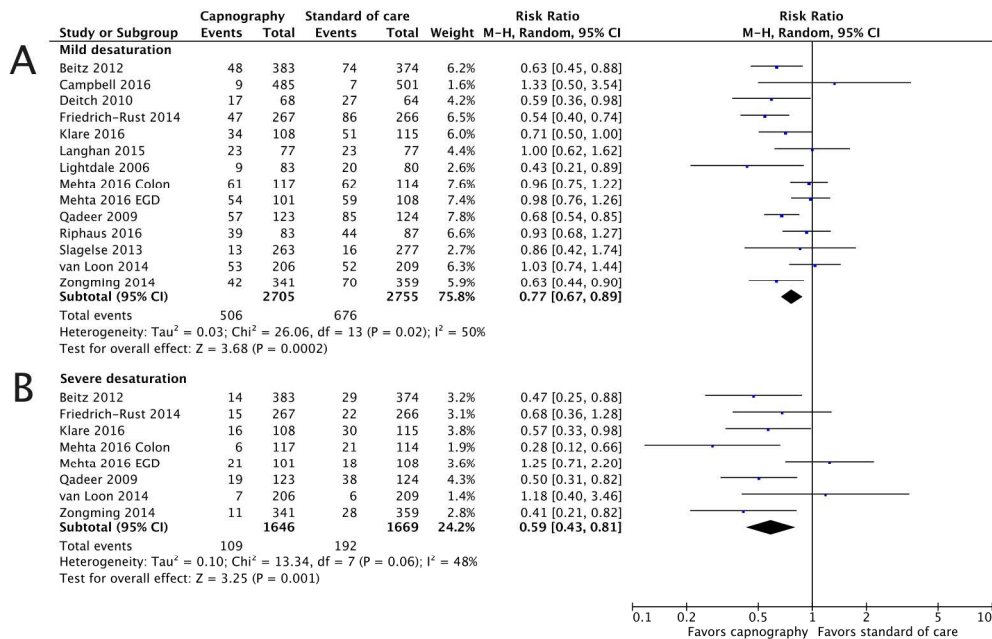

Severe and mild desaturation are significantly reduced with capnography monitoring  
 Figure 1  
 205x132mm (300 x 300 DPI)

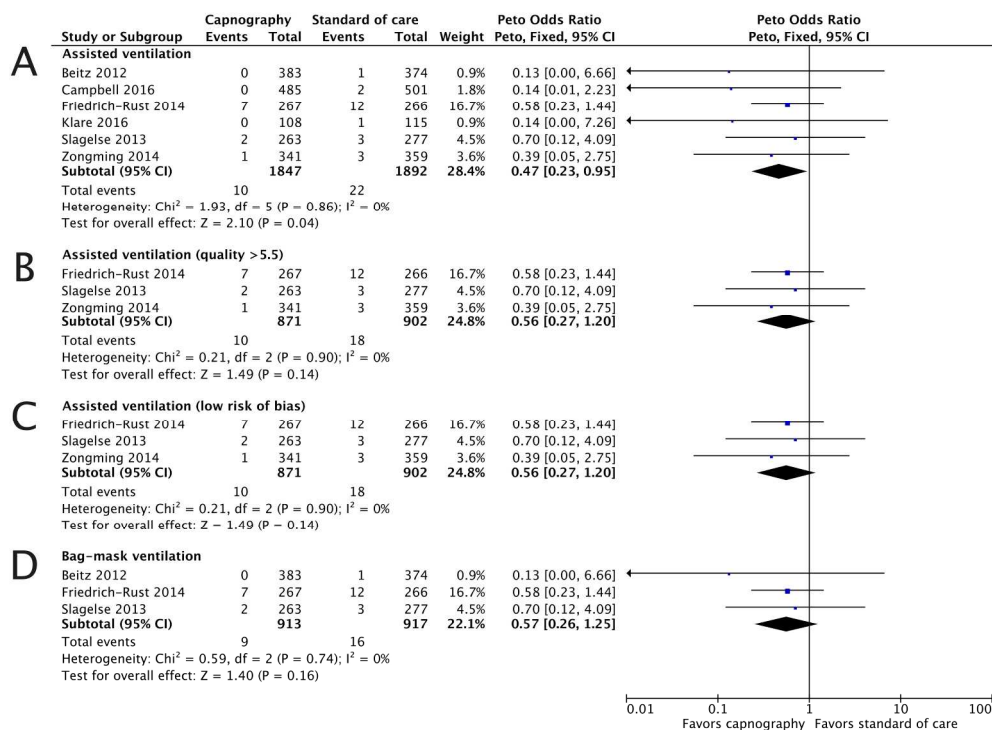

The need for assisted ventilation is reduced with capnography monitoring  
 Figure 2  
 205x152mm (300 x 300 DPI)





# PRISMA 2009 Checklist

| Section/topic                      | #  | Checklist item                                                                                                                                                                                                                                                                                              | Reported on page # |
|------------------------------------|----|-------------------------------------------------------------------------------------------------------------------------------------------------------------------------------------------------------------------------------------------------------------------------------------------------------------|--------------------|
| <b>TITLE</b>                       |    |                                                                                                                                                                                                                                                                                                             |                    |
| Title                              | 1  | Identify the report as a systematic review, meta-analysis, or both.                                                                                                                                                                                                                                         | 1                  |
| <b>ABSTRACT</b>                    |    |                                                                                                                                                                                                                                                                                                             |                    |
| Structured summary                 | 2  | Provide a structured summary including, as applicable: background; objectives; data sources; study eligibility criteria, participants, and interventions; study appraisal and synthesis methods; results; limitations; conclusions and implications of key findings; systematic review registration number. | 2-3                |
| <b>INTRODUCTION</b>                |    |                                                                                                                                                                                                                                                                                                             |                    |
| Rationale                          | 3  | Describe the rationale for the review in the context of what is already known.                                                                                                                                                                                                                              | 4                  |
| Objectives                         | 4  | Provide an explicit statement of questions being addressed with reference to participants, interventions, comparisons, outcomes, and study design (PICOS).                                                                                                                                                  | 4                  |
| <b>METHODS</b>                     |    |                                                                                                                                                                                                                                                                                                             |                    |
| Protocol and registration          | 5  | Indicate if a review protocol exists, if and where it can be accessed (e.g., Web address), and, if available, provide registration information including registration number.                                                                                                                               | 5                  |
| Eligibility criteria               | 6  | Specify study characteristics (e.g., PICOS, length of follow-up) and report characteristics (e.g., years considered, language, publication status) used as criteria for eligibility, giving rationale.                                                                                                      | 5-6                |
| Information sources                | 7  | Describe all information sources (e.g., databases with dates of coverage, contact with study authors to identify additional studies) in the search and date last searched.                                                                                                                                  | 5                  |
| Search                             | 8  | Present full electronic search strategy for at least one database, including any limits used, such that it could be repeated.                                                                                                                                                                               | 22                 |
| Study selection                    | 9  | State the process for selecting studies (i.e., screening, eligibility, included in systematic review, and, if applicable, included in the meta-analysis).                                                                                                                                                   | 22                 |
| Data collection process            | 10 | Describe method of data extraction from reports (e.g., piloted forms, independently, in duplicate) and any processes for obtaining and confirming data from investigators.                                                                                                                                  | 5                  |
| Data items                         | 11 | List and define all variables for which data were sought (e.g., PICOS, funding sources) and any assumptions and simplifications made.                                                                                                                                                                       | 6                  |
| Risk of bias in individual studies | 12 | Describe methods used for assessing risk of bias of individual studies (including specification of whether this was done at the study or outcome level), and how this information is to be used in any data synthesis.                                                                                      | 6                  |
| Summary measures                   | 13 | State the principal summary measures (e.g., risk ratio, difference in means).                                                                                                                                                                                                                               | 7                  |
| Synthesis of results               | 14 | Describe the methods of handling data and combining results of studies, if done, including measures of consistency (e.g., $I^2$ ) for each meta-analysis.                                                                                                                                                   | 7                  |



# PRISMA 2009 Checklist

| Section/topic                 | #  | Checklist item                                                                                                                                                                                           | Reported on page # |
|-------------------------------|----|----------------------------------------------------------------------------------------------------------------------------------------------------------------------------------------------------------|--------------------|
| Risk of bias across studies   | 15 | Specify any assessment of risk of bias that may affect the cumulative evidence (e.g., publication bias, selective reporting within studies).                                                             | 6                  |
| Additional analyses           | 16 | Describe methods of additional analyses (e.g., sensitivity or subgroup analyses, meta-regression), if done, indicating which were pre-specified.                                                         | 7                  |
| <b>RESULTS</b>                |    |                                                                                                                                                                                                          |                    |
| Study selection               | 17 | Give numbers of studies screened, assessed for eligibility, and included in the review, with reasons for exclusions at each stage, ideally with a flow diagram.                                          | 23                 |
| Study characteristics         | 18 | For each study, present characteristics for which data were extracted (e.g., study size, PICOS, follow-up period) and provide the citations.                                                             | 19,24              |
| Risk of bias within studies   | 19 | Present data on risk of bias of each study and, if available, any outcome level assessment (see item 12).                                                                                                | 16                 |
| Results of individual studies | 20 | For all outcomes considered (benefits or harms), present, for each study: (a) simple summary data for each intervention group (b) effect estimates and confidence intervals, ideally with a forest plot. | 17,24-27           |
| Synthesis of results          | 21 | Present results of each meta-analysis done, including confidence intervals and measures of consistency.                                                                                                  | 17,24-27           |
| Risk of bias across studies   | 22 | Present results of any assessment of risk of bias across studies (see Item 15).                                                                                                                          | 18                 |
| Additional analysis           | 23 | Give results of additional analyses, if done (e.g., sensitivity or subgroup analyses, meta-regression [see Item 16]).                                                                                    | 18                 |
| <b>DISCUSSION</b>             |    |                                                                                                                                                                                                          |                    |
| Summary of evidence           | 24 | Summarize the main findings including the strength of evidence for each main outcome; consider their relevance to key groups (e.g., healthcare providers, users, and policy makers).                     | 12-13              |
| Limitations                   | 25 | Discuss limitations at study and outcome level (e.g., risk of bias), and at review-level (e.g., incomplete retrieval of identified research, reporting bias).                                            | 13                 |
| Conclusions                   | 26 | Provide a general interpretation of the results in the context of other evidence, and implications for future research.                                                                                  | 13                 |
| <b>FUNDING</b>                |    |                                                                                                                                                                                                          |                    |
| Funding                       | 27 | Describe sources of funding for the systematic review and other support (e.g., supply of data); role of funders for the systematic review.                                                               | 14                 |

From: Moher D, Liberati A, Tetzlaff J, Altman DG, The PRISMA Group (2009). Preferred Reporting Items for Systematic Reviews and Meta-Analyses: The PRISMA Statement. PLoS Med 6(7): e1000097. doi:10.1371/journal.pmed1000097

For more information, visit: [www.prisma-statement.org](http://www.prisma-statement.org).

# BMJ Open

## PATIENT SAFETY DURING PROCEDURAL SEDATION USING CAPNOGRAPHY MONITORING: A SYSTEMATIC REVIEW AND META-ANALYSIS

|                                    |                                                                                                                                                                                                                                                                                                                                                                   |
|------------------------------------|-------------------------------------------------------------------------------------------------------------------------------------------------------------------------------------------------------------------------------------------------------------------------------------------------------------------------------------------------------------------|
| Journal:                           | <i>BMJ Open</i>                                                                                                                                                                                                                                                                                                                                                   |
| Manuscript ID                      | bmjopen-2016-013402.R3                                                                                                                                                                                                                                                                                                                                            |
| Article Type:                      | Research                                                                                                                                                                                                                                                                                                                                                          |
| Date Submitted by the Author:      | 22-Mar-2017                                                                                                                                                                                                                                                                                                                                                       |
| Complete List of Authors:          | Saunders, Rhodri; Coreva Scientific GmbH & Co. KG.<br>Struys, Michel; University of Groningen, Department of Anesthesiology<br>Pollock, Richard; Ossian Health Economics and Communications GmbH,<br>Mestek, Michael; Medtronic Inc, Patient Monitoring & Recovery<br>Lightdale, Jenifer; UMass Memorial Children's Medical Center, Pediatric<br>Gastroenterology |
| <b>Primary Subject<br>Heading</b>: | Anaesthesia                                                                                                                                                                                                                                                                                                                                                       |
| Secondary Subject Heading:         | Respiratory medicine                                                                                                                                                                                                                                                                                                                                              |
| Keywords:                          | Capnography, Meta-analysis, Procedural sedation, Ambulatory surgery                                                                                                                                                                                                                                                                                               |
|                                    |                                                                                                                                                                                                                                                                                                                                                                   |

SCHOLARONE™  
Manuscripts

**PATIENT SAFETY DURING PROCEDURAL SEDATION USING CAPNOGRAPHY****MONITORING: A SYSTEMATIC REVIEW AND META-ANALYSIS**

**Authors:** Rhodri Saunders DPhil<sup>1,2</sup>, Michel MRF Struys MD PhD FRCA<sup>3</sup>, Richard F Pollock MA MSci<sup>2</sup>, Michael Mestek PhD<sup>4</sup>, Jenifer R Lightdale MD MPH<sup>5</sup>

**Affiliations:** <sup>1</sup> Coreva Scientific GmbH & Co. KG., Freiburg, Germany  
<sup>2</sup> Ossian Health Economics and Communications, Basel, Switzerland  
<sup>3</sup> Department of Anesthesiology, University of Groningen, University Medical Center Groningen, Groningen, The Netherlands; Department of Anesthesia, Ghent University, Gent, Belgium  
<sup>4</sup> Medtronic, Patient Monitoring & Recovery, Boulder, CO  
<sup>5</sup> Division of Pediatric Gastroenterology, UMass Memorial Children's Medical Center, Worcester, MA; Department of Pediatrics, University of Massachusetts Medical School, Worcester, MA

**Corresponding author:** Richard Pollock MA MSci  
Ossian Health Economics and Communications GmbH,  
Bäumleingasse 20,  
4051 Basel, Switzerland  
+41 61 271 62 14  
pollock@ossianconsulting.com

**Word count:** 5,233

**Running title:** Patient safety during sedation: a meta-analysis

**Key words:** Capnography; Respiratory compromise; Oxygen desaturation; Apnea; Assisted ventilation;

**Target journal:** BMJ

**Grant support:** This study was supported by funding from Medtronic plc.

## ABSTRACT

### Objective

To evaluate the effect of capnography monitoring on sedation-related adverse events during procedural sedation and analgesia (PSA) administered for ambulatory surgery relative to visual assessment and pulse oximetry alone.

### Design and Setting

Systematic literature review and random effects meta-analysis of randomized controlled trials (RCTs) reporting sedation-related adverse event incidence when adding capnography to visual assessment and pulse oximetry in patients undergoing PSA during ambulatory surgery in the hospital setting. Searches for eligible studies published between January 1, 1995 and December 31, 2016 (inclusive) were conducted in PubMed, the Cochrane Library and EMBASE without any language constraints. Searches were conducted in January 2017, screening and data extraction were conducted by two independent reviewers, and study quality was assessed using a modified Jadad scale.

### Interventions

Capnography monitoring relative to visual assessment and pulse oximetry alone.

### Primary and Secondary Outcome Measures

Predefined endpoints of interest were desaturation/hypoxemia (the primary endpoint), apnea, aspiration, bradycardia, hypotension, premature procedure termination, respiratory failure, use of assisted/bag-mask ventilation and death during PSA.

### Results

The literature search identified 1,006 unique articles, of which 13 were ultimately included in the meta-analysis. Addition of capnography to visual assessment and pulse oximetry was associated with a significant reduction in mild (risk ratio [RR] 0.77, 95% CI 0.67–0.89) and severe (RR 0.59, 95% CI 0.43–

0.81) desaturation, as well as in the use of assisted ventilation (odds ratio 0.47, 95% CI 0.23–0.95). No significant differences in other endpoints were identified.

### Conclusions

Meta-analysis of 13 RCTs published between 2006 and 2016 showed a reduction in respiratory compromise (from respiratory insufficiency to failure) during PSA with the inclusion of capnography monitoring. In particular, use of capnography was associated with less mild and severe oxygen desaturation, which may have helped to avoid the need for assisted ventilation.

## STRENGTHS AND LIMITATIONS OF THIS STUDY

### Strengths

- The studies included in the analysis were all published in 2006 or later, representing modern medical practice and providing clinically relevant evidence of improvements in patient safety with the use of capnography monitoring.
- The study findings further substantiate a previously published meta-analysis, which found that capnography monitoring was more likely to detect adverse events. It also suggests that superior detection may reduce the use of clinical interventions intended to rescue patients from potential adverse outcomes.

### Limitations

- The level of sedation employed in each study was not uniformly reported, resulting in a mixture of different sedation levels in the primary analysis and precluding an analysis of outcomes by sedation level.
- As with all meta-analyses, the study findings may be affected by publication, search or selection bias affecting the studies ultimately included in the analysis. Where possible, steps were taken to minimize the effects of bias on the analysis, but the degree to which these steps were successful is difficult to quantify.

## BACKGROUND AND AIMS

The administration of procedural sedation and analgesia (PSA) involves achieving a drug-induced depression in level of consciousness and pain to ensure the comfort and cooperation of patients undergoing non-surgical and minor surgical procedures. Significant adverse events associated with PSA are relatively rare but not inconsequential, and can include severe oxygen desaturation, bradycardia, hypotension, and cardiac arrest.<sup>1,2</sup> Consensus dictates that levels of sedation are directly related to patient risk during PSA, as is the potential for unintended progression from moderate to deep sedation.<sup>3</sup> Generally speaking, most cardiopulmonary events associated with PSA stem from poor or absent ventilation cascading into hypoxia, tissue injury and cardiac decompensation (Supplementary Figure 1). In turn, maintaining patient safety involves the identification of respiratory compromise to prompt the use of clinical intervention before further complications occur.<sup>4,5,6,7,8,9</sup>

In current clinical practice, patient monitoring during PSA often relies on visual assessment of ventilation and use of pulse oximetry, which reflects hypoxemia.<sup>10,11,12,13,14</sup> To date, a mandate to include capnography in patient monitoring, as a means of early detection of alveolar hypoventilation, has remained a topic of debate.<sup>15</sup> In particular, there has been a perceived gap between various study outcomes and evidence of improved patient safety. No studies have provided “hard proof” that addition of capnography to patient monitoring may reduce severe morbidity and mortality during PSA (in part because of ethical considerations to ensure patient rescue). Previous efforts to use meta-analysis to determine the utility of capnography to identify clinically significant respiratory depression have been faulted for large heterogeneity and non-standard endpoints.<sup>16,17</sup>

The primary aim of the present systematic review and meta-analysis was to understand whether capnography added to patient monitoring only (consisting of pulse oximetry and visual inspection of ventilation) reduces the incidence (or odds) of adverse events during PSA based on randomized controlled trials of patients undergoing a variety of surgical procedures. The analysis was based on the hypothesis that earlier and more sensitive detection of ventilatory changes with capnography may

1  
2  
3 allow for more timely intervention and prevention of potential adverse events, such as cardiac  
4  
5 dysrhythmias. Throughout the analyses, we sought to provide the highest level of synthesized  
6  
7 evidence with respect to the clinical utility of capnography monitoring during PSA. To mitigate  
8  
9 potential pitfalls due to non-standard endpoints, particular emphasis was placed on maintaining a  
10  
11 consistent definition of adverse events across all studies included.  
12

## 13 14 15 **METHODS**

16  
17 Literature searches were conducted in PubMed, the Cochrane Library and EMBASE. Search terms were  
18  
19 a combination of Medical Subject Heading (MeSH) terms and free-text searches within the articles title  
20  
21 and abstract. Searches aimed to identify all literature reporting on randomized, controlled trials in  
22  
23 patients receiving sedation during ambulatory surgery and in which visual assessment of ventilation  
24  
25 and pulse oximetry monitoring (control) was compared with control plus capnography. "Grey" or  
26  
27 unpublished literature (including congress abstracts) was included in the search strategy and, as the  
28  
29 review protocol was not registered in advance, the full search strategy (Supplementary Table 1) and  
30  
31 additional details are provided in the Supplement. Only articles or abstracts published on or after  
32  
33 January 1, 1995 were included and all searches were performed on January 15, 2017. A previous  
34  
35 systematic review in this area did not identify any study prior to 1995,<sup>16</sup> and studies published prior to  
36  
37 1995 were considered unlikely to reflect modern clinical practice. No language exclusion was applied  
38  
39 and inclusion was not dependent on the capnography monitor in use. After duplicate removal, title  
40  
41 and abstract screening (Supplementary Table 2) was performed independently by RS and RFP using  
42  
43 Sourcerer (Covalence Research Ltd, London UK).<sup>18</sup> Full-text versions of all non-excluded articles were  
44  
45 retrieved by MM and reviewed independently by RS and RFP. Data were then extracted independently  
46  
47 by RS and RFP into data extraction forms in Microsoft Excel (Microsoft Corporation, Redmond, WA).  
48  
49 Any discrepancies in the extracted data were resolved by reference to the original study, reaching  
50  
51 consensus between RS and RFP. All extracted endpoint data were reviewed by JL and MMS for clinical  
52  
53 utility to ensure that all synthesized data relate to clinically equivalent endpoints. Extracted data  
54  
55  
56  
57  
58  
59  
60



1  
2  
3 included the number of patients with events and the population at risk, in addition to items required  
4  
5 to assess article quality and bias. Reference lists of included studies were not searched.  
6  
7

### 8 **Endpoints**

9  
10 Predefined endpoints of interest were desaturation/hypoxemia (the primary endpoint, with severe  
11  
12 desaturation defined as  $SpO_2 \leq 85\%$ ), apnea, aspiration, bradycardia, hypotension, premature  
13  
14 procedure termination, respiratory failure, use of assisted/bag-mask ventilation and death during PSA.  
15  
16 The protocol was left open for the analysis of other patient safety endpoints that were reported by  $\geq 3$   
17  
18 studies. Cardiac arrest and death were considered to be representative of severe morbidity and  
19  
20 mortality. Notably, the present analysis examined individual endpoints as opposed to composite  
21  
22 endpoints (e.g. desaturation, apnea, or respiratory depression) and included analyses of more specific  
23  
24 endpoints, such as oxygen desaturation  $< 90\%$  and  $< 85\%$ .  
25  
26  
27

### 28 **Quality and potential bias**

29  
30 Assessment of article quality was conducted on a study (as opposed to outcome) level using a  
31  
32 modified Jadad score,<sup>19</sup> with additional criteria added to make the adaptation specific to monitoring.  
33  
34 The Jadad score assesses studies based on their design (randomized and blinded) and their reporting  
35  
36 (all patients accounted for), with a maximal score of 5 (high quality) and a low score of 0 (low quality).  
37  
38 Additional data included here were endpoint definitions, patient population, hospital location at which  
39  
40 patients underwent sedation, and the staff responsible for monitoring. In line with the Jadad score,  
41  
42 items related to trial design could score up to twice as highly as items relating to trial reporting. The  
43  
44 reporting of the inclusion/exclusion criteria and endpoint definitions scored one point each, and  
45  
46 reporting the location of sedation, and the monitoring staff scored half-point point each, making the  
47  
48 maximal score 8 (high quality). For the purposes of analyzing study quality, studies with scores of 0–  
49  
50 5.5 were considered to be low quality, while studies scoring 6.0–8.0 were designated as high-quality  
51  
52 studies.  
53  
54  
55  
56  
57  
58  
59  
60

1  
2  
3 Risk of bias in results was evaluated independently from the quality assessment through the  
4  
5 declaration of funding sources and conflicts of interest. If the study was funded by industry then the  
6  
7 study scored 2, any conflicts of interest declared relating to industry funding outside of the current  
8  
9 research publication scored 1. A study with low potential for bias, therefore, would have a score of 0. A  
10  
11 high potential for bias was defined as a score of 3, while a score of 1–2 was considered to indicate  
12  
13 moderate potential for bias. The absence of industry funding was not taken to signify an absence of  
14  
15 bias, but the presence of industry funding or conflicts of interest was assumed to be an indicator of  
16  
17 bias.<sup>20</sup>  
18  
19

## 20 21 **Analysis**

22  
23 Data extraction, initial data consolidation and summary statistics were performed in Microsoft Excel.  
24  
25 Data for each endpoint were subsequently entered into Review Manager 5.3.4 for results synthesis.<sup>21</sup>  
26  
27 Heterogeneity of data was evaluated using  $\text{Chi}^2$  and  $I^2$  statistics presented by Review Manager 5.3.4,  
28  
29 with  $I^2$  further categorized by the tentative Higgins *et al.* heterogeneity categories of: low, moderate  
30  
31 and high.<sup>22</sup> The meta-analysis performed calculated the mean intervention effect across all eligible  
32  
33 studies using (after analysis of heterogeneity) a random effects model as described by DerSimonian  
34  
35 and Laird.<sup>23</sup> An estimate of between-study variation was provided by the Mantel-Haenszel  
36  
37 methodology.<sup>24</sup>  
38  
39

40  
41 The main outcome reported for each endpoint was the pooled mean risk ratio (RR), except when the  
42  
43 incidence of rare endpoints was less than 1%. In these instances, the Peto method was used as a fixed-  
44  
45 effects model designed specifically for analysis of rare endpoints. The Peto method only reports an  
46  
47 odds ratio (OR) and, to allow comparison between all endpoints analyzed, the pooled mean OR was  
48  
49 therefore also presented for all analyses. In all cases, the 95% confidence interval is reported to allow  
50  
51 assessment of significance.  
52

53  
54 Sensitivity analyses were specified *a priori* and the tested conditions were: (1) inclusion of high-quality  
55  
56 studies only, (2) inclusion of only moderate sedation, (3) inclusion of only studies with low risk of bias,  
57  
58  
59  
60

1  
2  
3 (4) inclusion of only studies based in the US, (5) inclusion of only studies based in Europe, (6) exclusion  
4 of pediatric data, (7) exclusion of gender-specific studies, (8) exclusion of data in patients <30 years of  
5 age. No formal statistical comparisons were made between sensitivity analyses, and intervention  
6 effects were not calculated for the excluded studies, thereby mitigating the introduction of type 1  
7 error into the analysis.  
8  
9  
10  
11  
12

### 13 **Patient involvement**

14  
15 No patients, service users, or lay people were involved in the design or conduct of this study. Outcome  
16 measures were all related to patient safety during PSA, but were not developed based on an explicit  
17 elicitation of patient priorities, experience, and preferences.  
18  
19  
20  
21  
22

## 23 **RESULTS**

24  
25 Literature searches of PubMed, the Cochrane Library and EMBASE returned 385, 87, and 804 articles,  
26 respectively. After removal of 270 duplicates (62 Cochrane, 208 EMBASE), 1,006 articles remained for  
27 abstract screening. Although reasons for exclusion varied (Supplementary Table 2), the two  
28 independent reviewers agreed upon a total of 24 articles to be retained for full-text review (Cohen's  
29 kappa, 1.0). Eleven articles were excluded on full-text review (Supplementary Figure 2) because they:  
30 reported duplicate data (n=5), did not report patient safety data (n=3), did not include sedation (n=2),  
31 or compared two different capnography monitors (n=1). The 13 articles included for analysis are  
32 presented in Table 1 and included data on 14 patient groups (one study, published by Mehta *et al.*,  
33 provided separate data on colonoscopy and esophagogastroduodenoscopy).<sup>25</sup> All studies reported  
34 desaturation endpoints, although the definition did vary by study (Supplementary Table 3). Other  
35 endpoints were heterogeneously reported, but were in most cases reported by  $\geq 3$  studies making  
36 meta-analysis feasible as per the pre-defined protocol. Results reported are from random-effects  
37 models unless otherwise stated. Results for hypotension and use of supplemental oxygen are  
38 provided in the Supplement.  
39  
40  
41  
42  
43  
44  
45  
46  
47  
48  
49  
50  
51  
52  
53  
54  
55  
56  
57  
58  
59  
60

### Mild desaturation

All studies (Table 1) reported mild desaturation, with the definition varying from an oxygen saturation (SpO<sub>2</sub>) of <95% to <90% for ≥15 seconds.<sup>5,6,25,26,27,28,29,30,31,32,33,34,35</sup> There was evidence of heterogeneity (I<sup>2</sup> = 50%, moderate) in the primary analysis. Results indicated that capnography significantly reduced the incidence of mild desaturation (RR 0.77, 95% CI 0.67–0.89; OR = 0.67, 95% CI 0.55–0.82; Figure 1). The odds of a mild desaturation event were reduced by over 30% when capnography monitoring is used, compared with no use of capnography. If only high-quality studies (n=7, 8 populations) were included (Supplementary Figure 3), there was evidence of heterogeneity (I<sup>2</sup> = 61%, moderate) but the outcome did not differ: RR 0.75 (95% CI 0.62–0.92; OR 0.63, 95% CI 0.48–0.83). Using exclusively studies with equivalent definitions of mild desaturation (<90%, n=8, 9 populations), evidence of heterogeneity (I<sup>2</sup> = 57%, moderate) was still present; the RR estimated from these studies was 0.76 (95% CI 0.65–0.89; OR 0.64, 95% CI 0.51–0.80).

### Severe desaturation

Seven studies, of which four were classified as high quality, reported severe desaturation.<sup>5,25,27–30,34</sup> All but one of the studies defined severe desaturation as SpO<sub>2</sub> </≤85%. The analysis for this endpoint was aligned with the significant reduction in the odds of mild desaturation with the inclusion of capnography, with a RR of 0.59 (95% CI 0.43–0.81) and OR of 0.55 (95% CI 0.38–0.78). As with mild desaturation, there was evidence of heterogeneity (I<sup>2</sup> = 47%, moderate).

Synthesizing estimates from high-quality studies supported the analysis of all studies, the RR (0.57 95% CI 0.36–0.92) and OR of 0.53 (95% CI 0.31–0.89) reducing by 0.02 and the confidence intervals widening (Supplementary Figure 4). There was moderate heterogeneity between studies (I<sup>2</sup> = 64%, moderate). Focusing on the six studies reporting an endpoint of SpO<sub>2</sub> </≤85%, there was moderate heterogeneity and the RR was estimated at 0.56 (95% CI 0.41–0.78). Overall, a 40% reduction in the incidence of severe desaturation events would be expected with the use of capnography monitoring relative to standard of care.

### Bradycardia

Six studies, three of high-quality, reported bradycardia outcomes.<sup>25,28–30,33,34</sup> The definition of bradycardia (heart rate <50 beats/minute) was consistent among five of the six trials and there was no evidence of heterogeneity between the studies ( $I^2 = 0\%$ , low). In four studies, the incidence of bradycardia was higher in the capnography arm compared with the control arm and overall, capnography monitoring was associated with a non-significant increase in bradycardia (RR 1.15, 95% CI 0.89–1.48; OR 1.16, 95% CI 0.88–1.54) and outcomes were not affected by the inclusion of only high-quality studies or only studies with low risk of bias (Supplementary Figure 7).

### Apnea

Apnea was less widely reported or reported in combination with disordered respiration. Comparable endpoints were reported in five studies, of which three were high quality.<sup>5,6,25,33,34</sup> There was substantial heterogeneity in the apnea outcomes ( $I^2 = 92\%$ , high) and the analysis yielded a non-significant RR of 1.17 (95% CI 0.72–1.89). In an analysis including exclusively high-quality studies, the RR favored capnography but remained non-significant at 0.89 (95% CI 0.64–1.23; Supplementary Figure 8).

There was one clear outlier in the apnea analysis, with data from Klare *et al.* 2016 reporting a RR of 11.71 (95% CI 5.30–25.90).<sup>34</sup> Apnea in this study was undefined for the standard of care arm, but in the capnography arm the apnea criterion was the absence of exhaled CO<sub>2</sub> for  $\geq 15$  seconds. Different criteria between trial arms may explain the large difference in detected apnea, and capnography would be expected to detect apnea earlier than standard of care monitoring. Excluding this study from the analysis resulted in a RR of 0.85 (95% CI 0.65–1.12; OR 0.73, 95% CI 0.43–1.24).

### Assisted ventilation

Only one study reported “respiratory failure”, which was treated with assisted bag-mask ventilation.<sup>28</sup> In contrast, the number of studies (n=6) reporting assisted and/or bag-mask ventilation was sufficient to perform a meta-analysis of this endpoint as a surrogate for respiratory failure.<sup>5,28,29,31,32,34</sup> Due to the

1  
2  
3 low number of events, a Peto fixed-effects odds-ratio model was used to assess this endpoint.  
4  
5 Analysis found no evidence of heterogeneity ( $I^2 = 0\%$ , low) and demonstrated a significant reduction  
6  
7 in assisted ventilation with capnography monitoring (OR 0.47, 95% CI 0.23–0.95). In every case, the  
8  
9 need to provide assisted ventilation was lower in the capnography arm compared with the control arm  
10  
11 (Figure 2). Three studies were of high-quality and had a low risk of bias, meta-analysis of these studies  
12  
13 gave an OR of 0.56 (95% CI 0.27–1.20). Three studies specified assisted ventilation as bag-mask  
14  
15 ventilation, and for this subset of studies the OR was 0.56 (95% CI 0.26–1.25).  
16  
17

### 18 **Sensitivity analyses**

19  
20  
21 A series of sensitivity analyses were conducted in which the studies included in the estimation of the  
22  
23 RR and OR were varied. The results of these analyses are presented in Table 2 and show that results  
24  
25 were generally robust to the studies included for data synthesis. There were limited data available to  
26  
27 assess the impact of capnography monitoring during moderate sedation.  
28  
29

## 30 **DISCUSSION**

31  
32  
33 The findings of this meta-analysis of recent RCTs comparing visual assessment of ventilation and pulse  
34  
35 oximetry monitoring with and without capnography during PSA showed that the odds of oxygen  
36  
37 desaturation and assisted ventilation events were significantly reduced with the use of capnography.  
38  
39 Other endpoints that could be affected by capnography monitoring were also considered but no  
40  
41 significant differences were detected. Of potential clinical importance, was the consistency of data  
42  
43 across multiple high-quality clinical trials reporting a reduced incidence of assisted ventilation with  
44  
45 capnography monitoring. No endpoints assessed in the meta-analysis indicated significant patient  
46  
47 safety concerns with capnography.  
48  
49

50  
51 Physician concerns for patient safety often focus on mortality and severe morbidity. Using the need  
52  
53 for assisted ventilation as a proxy, there was evidence that severe morbidity may differ between  
54  
55 control and capnography arms in the present meta-analysis. Although we note that no single trial  
56  
57 showed a significant difference in this outcome, the information now exists to perform a power  
58  
59  
60

1  
2  
3 calculation to determine the number of patients that would be required to be enrolled in a  
4  
5 prospective clinical trial to demonstrate a significant reduction in patient harm. The incidence of  
6  
7 mortality and severe morbidity events during nurse-administered PSA has been reported to be 1  
8  
9 event per 303 procedures (0.33%).<sup>36</sup> Taking this value along with the assumption that capnography  
10  
11 could prevent 50% of events (in line with the estimate from our analysis), and employing trial-size  
12  
13 estimation methodology reported by Zhong (2009) showed that 27,726 patients would be required to  
14  
15 demonstrate statistical superiority.<sup>37</sup> Switching to an assumption that capnography would prevent  
16  
17 10% of events, the required enrollment would be >900,000 patients. As such, we submit the feasibility  
18  
19 of performing superiority trials is low, and leaves meta-analyses, such as the present study, as the only  
20  
21 viable alternative for determining the impact of capnography on such critical patient endpoints.  
22  
23

24  
25 Our analysis is timely given the ongoing debate as to whether the addition of capnography to patient  
26  
27 monitoring during PSA adds value.<sup>17</sup> Without doubt, potential technical and financial burdens have  
28  
29 further limited adoption of capnography monitoring in various clinical settings.<sup>15,17</sup> Nevertheless, it is  
30  
31 important to recognize that patient safety benefits may offset a number of these concerns if the  
32  
33 outcomes are applicable to current medical practice.<sup>38</sup> In this regard, the 13 trials identified in the  
34  
35 present analysis were all recent, with the first published study identified in 2006. The data used in the  
36  
37 present meta-analysis therefore represent modern medical practice, and provides consistent evidence  
38  
39 of improvements in patient safety with the use of capnography monitoring.  
40  
41

42  
43 Our findings further substantiate a previously published meta-analysis (Waugh *et al.*), which found  
44  
45 that capnography monitoring was more likely to detect adverse events, but was faulted for large  
46  
47 endpoint heterogeneity.<sup>16</sup> In the present meta-analysis, we focused on identifying high-quality studies,  
48  
49 and on maintaining consistent definitions across all included studies. The results show that the  
50  
51 addition of capnography to patient monitoring during PSA results in increased patient safety, with  
52  
53 significant reductions in mild and severe levels of oxygen desaturation, as well as the need for assisted  
54  
55 ventilation.  
56  
57  
58  
59  
60

1  
2  
3 A recent meta-analysis by Conway *et al.* reported a significant benefit with capnography during  
4 colonoscopy only with respect to hypoxemia. However, the present meta-analysis identified and  
5 screened only a fraction of the literature included in the present analysis (388 papers in Conway *et al.*,  
6 compared with 1,006 papers in the current study) and retrieved fewer randomized controlled trials (6  
7 versus 13). In addition, Conway *et al.* excluded two trials in which an independent observer monitored  
8 capnography output for all patients, and signaled to the attending physician when respiratory  
9 compromise was identified with capnography either immediately (intervention) or after a specified  
10 delay (control).<sup>56</sup> The rationale for this study design was to prevent unnecessary patient harm while  
11 avoiding investigator bias. Based on our understanding, the two trials excluded in the Conway *et al.*  
12 analysis were the only studies in the literature that could be considered fully blinded. Among the other  
13 studies, the attending physician would have been aware of study arm assignment.<sup>27,29,32</sup>

14  
15  
16  
17  
18  
19  
20  
21  
22  
23  
24  
25  
26  
27 As with other major assessment tools such as Delphi, Consort, and the Cochrane risk of bias tool,  
28 blinding is an integral part of the Jadad score used in the present analysis.<sup>19,39</sup> The trials excluded from  
29 the Conway *et al.* analysis are both considered to be "high quality" in the present analysis, driven in  
30 part by the inclusion of blinding in the scoring methodology. Other included trials, though potentially  
31 more representative of current clinical practice, are open to operator bias, the consequences of which  
32 were demonstrated in 2012 by Veerus *et al.*<sup>40</sup>

33  
34  
35  
36  
37  
38  
39  
40 The Jadad score is a widely used score of clinical study quality.<sup>41</sup> In the present analysis, the scale was  
41 modified to make it more applicable to monitoring studies by including parameters such as  
42 monitoring staff and procedure location. One potential limitation of the present quality appraisal  
43 approach was the lack of validation of the modifications to the Jadad score; however, as might have  
44 been anticipated, the modified score does significantly correlate with the raw Jadad score (adjusted  
45  $R^2 = 0.93$ ,  $p < 0.01$ ). Furthermore, analysis of mild desaturation data using a mixed model that took the  
46 Jadad score or the modified Jadad score as a covariate, found no significant difference between  
47 models and the heterogeneity accounted for (approximately 50% for both models).



1  
2  
3 Another ongoing debate in PSA concerns the clinical importance of seemingly minor endpoints, such  
4 as mild desaturation (oxygenation <90% for 15 seconds). Although such endpoints have traditionally  
5 been considered transient and perhaps clinically insignificant during PSA, several recent studies of  
6 common intraoperative events have suggested that mild desaturation may have more impact on  
7 post-surgical outcomes than has previously been recognized.<sup>42</sup> For example, Dunham *et al.* looked  
8 retrospectively and determined that surgical patients who experienced perioperative  
9 hypoxemia/desaturation had a significant increase in their length of hospital stay (+2.0 days,  
10  $p < 0.0001$ ).<sup>43</sup> In turn, the impact of transient desaturation during PSA in terms of patient outcomes and  
11 quality of life may yet be of importance but remains to be determined.

12  
13  
14  
15  
16  
17  
18  
19  
20  
21  
22  
23 Over all of the randomized trials included in the analysis, there was one report of patient mortality,  
24 which occurred in the standard of care arm of the trial presented by Klare *et al.*, 2016.<sup>34</sup> Only the  
25 largest trials reported any requirement for assisted/bag-mask ventilation, which is used as an  
26 intervention and thereby a proxy measure for potentially life-threatening events. Although it is widely  
27 accepted that much larger studies would be useful to assess whether or not capnography monitoring  
28 impacts patient major morbidity and mortality, there has been no determination to date of the trial  
29 size that would be required. Power calculations furthered by our meta-analysis suggest such a large  
30 randomized controlled trial is likely to be impractical.

31  
32  
33  
34  
35  
36  
37  
38  
39  
40 For healthcare providers, the most significant finding may be the consistency of data surrounding  
41 assisted ventilation and severe oxygen desaturation with capnography. Two closed claim reviews both  
42 found that inadequate oxygenation/ventilation was the most frequent event leading to a claim related  
43 to PSA outside the operating room.<sup>44,45</sup> The potential cost burden is demonstrated by the median cost  
44 of a claim settled being USD 330,000 (in 2007 USD).<sup>44</sup> The authors reported that better monitoring  
45 would have reduced the number of claims.<sup>44</sup> A similar message was returned following the fourth  
46 National Audit Project in the UK, which analyzed major complications of airway management in the  
47 National Health Service and determined that capnography monitoring could have led to earlier  
48 identification of airway obstruction, potentially preventing 74% of death or neurological injury

1  
2  
3 cases.<sup>46,47</sup> Studies included in the present meta-analysis reported that disordered ventilation as  
4  
5 detected by capnography preceded desaturation events by 30 to 60 seconds.  
6

7  
8 The meta-analysis did find an increase in bradycardia with capnography monitoring that was non-  
9  
10 significant. However, in each of the trials reporting higher incidence the patients in the capnography  
11  
12 arm had larger doses and increased use of multiple agents for inducing PSA. Such confounding is  
13  
14 plausible, may not be unusual, and was discussed as possible factor in the trial outcomes by  
15  
16 Campbell *et al.* 2016.<sup>48</sup> All other findings of the current analysis were in line with expectations around  
17  
18 the potential benefits of capnography; as further substantiated by the results of our meta-analysis,  
19  
20 earlier identification of respiratory compromise appears to result in more timely intervention and  
21  
22 prevention of its escalation into patient harm.  
23

24  
25 As with all data synthesis projects, the present study is only as accurate and reliable as the data  
26  
27 underlying it. In the literature, there are examples of newly-published clinical trials that do not align  
28  
29 with the results of published meta-analyses, and meta-analysis results changing on the publication of  
30  
31 new data.<sup>49,50</sup> The systematic nature of study identification and inclusion criteria in the present analysis  
32  
33 was designed to identify all available literature and provide the most robust estimates of intervention  
34  
35 effect. However, the included studies came from a variety of hospital settings, in which the rate of  
36  
37 patient safety events might vary. This is apparent in the clinical trial results presented by Mehta *et al.*,  
38  
39 where colonoscopy and esophagogastroduodenoscopy were assessed independently due to  
40  
41 differences in outcomes.<sup>25</sup> Analyses for particular settings were undertaken, but were then limited by  
42  
43 reduced data availability. In total, this analysis represented 5,460 patients (control 2,755 and  
44  
45 capnography 2,705) over 13 studies. Between trials, the number of patients enrolled varied between  
46  
47 132 and 986. Notably, of the six studies that identified rare outcomes (e.g. use of assisted ventilation),  
48  
49 five enrolled >500 patients.  
50  
51  
52  
53  
54  
55  
56  
57  
58  
59  
60

## CONCLUSIONS

The results of this comprehensive meta-analysis of clinical trials provide clear and consistent evidence of decreased respiratory compromise when capnography monitoring is used during procedural sedation and analgesia (PSA). Specifically, the analysis identified a statistically significant and clinically meaningful reduction in mild and severe oxygen desaturation, as well as in assisted ventilation. Large, well-designed, randomized controlled trials to provide direct links between use of capnography and reduction in patient harm may not be feasible. In turn, calls for this type of primary evidence may delay adoption of capnography monitoring during PSA as a valuable tool for early intervention and improved patient safety.

**Word Count** 5,233

## AUTHOR CONTRIBUTIONS

MM formulated the research question; RFP and RS devised the search strategy and data extraction protocol, which was critically reviewed and revised by MM, JRL and MMRFS; RFP and RS then conducted the literature searches, screening, data extraction, and meta-analysis, and co-wrote the manuscript; MM, JRL and MMRFS critically reviewed the manuscript and made substantive revisions prior to submission.

## DATA SHARING STATEMENT

All data used to derive the outcomes presented in the study are documented in the manuscript and supplementary materials. No additional data are therefore available.

## **PUBLICATION RIGHTS**

The Corresponding Author has the right to grant on behalf of all authors and does grant on behalf of all authors, an exclusive license (or non-exclusive for government employees) on a worldwide basis to the BMJ Publishing Group Ltd to permit this article (if accepted) to be published in BMJ editions and any other BMJ PGL products and sublicences such use and exploit all subsidiary rights, as set out in our licence.

## **TRANSPARENCY DECLARATION**

The lead author (the manuscript's guarantor) affirms that the manuscript is an honest, accurate, and transparent account of the study being reported. No important aspects of the study have been omitted and any discrepancies from the study as planned (and, if relevant, registered) have been explained.

## **ETHICAL APPROVAL**

No ethical approval was required for the study as all data were derived from published data; neither animal nor human subjects were enrolled as part of the present study.

## **FUNDING AND STUDY SPONSOR ROLE**

This study was funded by Medtronic plc following a research proposal submitted by Ossian Health Economics and Communications GmbH. The sponsor reviewed the final manuscript prior to submission, but submission was not contingent on a particular outcome of the analysis.

## **FINANCIAL AND COMPETING INTEREST DISCLOSURE**

All authors have completed the Unified Competing Interest forms at [www.icmje.org/coi\\_disclosure.pdf](http://www.icmje.org/coi_disclosure.pdf) (available on request from the corresponding author) and declare:

- Michael Mestek is a full-time employee of Medtronic plc.

- Richard F Pollock is a full-time employee of Ossian Health Economics and Communications GmbH, which received research and consultancy fees from Medtronic plc. to conduct the literature review and meta-analysis and prepare the manuscript.
- Rhodri Saunders was a full-time employee of Ossian Health Economics and Communications GmbH at the time of performing the meta-analysis and is currently a director of Coreva Scientific GmbH & Co. KG.
- Michel MRF Struys's research group/department received grants and funding from The Medicines Company (USA), Masimo (USA), Fresenius (Germany), Acacia Design (The Netherlands), Medtronic (USA) and honoraria from The Medicines Company (USA), Masimo (USA), Fresenius (Germany), Baxter (USA), Medtronic (USA), Demed Medical (Belgium).
- Jenifer R Lightdale has served as a consultant for Medtronic and Norgine, and has received speaker honorarium from Mead-Johnson and Perrigo.

## TABLES AND FIGURES

Table 1 Included studies reporting endpoints of interest

| Study (reference)                 | Country     | Trial dates    | Modified Jadad † | Potential for bias | Hospital setting               | Depth of sedation | Sedative            | Monitoring staff                           | Oxygen at baseline    | N (control, Cap) |
|-----------------------------------|-------------|----------------|------------------|--------------------|--------------------------------|-------------------|---------------------|--------------------------------------------|-----------------------|------------------|
| Beitz 2012 <sup>28</sup>          | Germany     | Feb-10, Jan-11 | 5.5              | High: 3            | Colonoscopy                    | "adequate"        | Propofol            | Not specified                              | 2 L/minute            | 757 (374, 383)   |
| Deitch 2010 <sup>26</sup>         | US          | Nov-06, Feb-08 | 5.5              | Low: 0             | Emergency department           | Moderate          | Propofol            | Not specified                              | 3 L/minute            | 132 (64, 68)     |
| Friedrich-Rust 2014 <sup>29</sup> | Germany     | Jun-12, May-13 | 6                | Low: 0             | Colonoscopy                    | Deep              | Propofol+           | Anesthesiologist or sedation-trained nurse | 2 L/minute            | 533 (266, 267)   |
| Langhan 2015 <sup>31</sup>        | US          | Sep-11, Jan-13 | 6                | Low: 0             | Pediatric emergency department | NA                | Ketamine, midazolam | "Treating staff"                           | None                  | 154 (77, 77)     |
| Lightdale 2006 <sup>6</sup>       | US          | Dec-03, Nov-04 | 8                | Low: 0             | Endoscopy                      | Moderate          | Fentanyl, midazolam | Independent observer                       | 2 L/minute            | 163 (80, 83)     |
| Qadeer 2009 <sup>5</sup>          | US          | Jan-07, May-08 | 7.5              | Moderate: 1        | ERCP and EUS                   | NA                | Midazolam+          | Independent observer                       | None                  | 247 (124, 123)   |
| Slagelse 2013 <sup>32</sup>       | Denmark     | Sep-10, Jan-11 | 6                | Low: 0             | Endoscopy                      | NA                | Propofol            | Sedation-trained nurse                     | 2-3 L/minute          | 540 (277, 263)   |
| van Loon 2014 <sup>27</sup>       | Netherlands | Apr-10, Jan-11 | 5                | Low: 0             | Gynecology                     | Deep              | Propofol            | Medical team providing sedation            | None                  | 415 (209, 206)   |
| Zongming 2014 <sup>30</sup>       | China       | Nov-10, May-13 | 6                | Low: 0             | Abortion                       | Deep              | Propofol            | Anesthesiologist                           | 3 L/minute            | 700 (359, 341)   |
| Campbell 2016                     | Canada      | Apr-06, Apr-12 | 5                | Moderate: 2        | Emergency department           | NA                | Physician's choice  | Paramedic acute care practitioner          | 98.7% received oxygen | 986 (501, 485)   |
| Klare 2016 <sup>34</sup>          | Germany     | Feb-10, Oct-11 | 5.5              | Moderate: 1        | ERCP                           | Deep              | Midazolam and       | Physician not                              | 2 L/minute            | 238 (117, 121)   |

|                                  |         |                |     |         |             |            |                                        |                      |            |                |
|----------------------------------|---------|----------------|-----|---------|-------------|------------|----------------------------------------|----------------------|------------|----------------|
|                                  |         |                |     |         |             |            | propofol                               | performing procedure |            |                |
| Mehta 2016 (colon) <sup>25</sup> | US      | Dec-13, Jan-15 | 8   | Low: 0  | Colonoscopy | Moderate   | Fentanyl or meperidine, plus midazolam | Independent observer | None       | 231 (114, 117) |
| Mehta 2016 (EGD) <sup>25</sup>   | US      | Dec-13, Jan-15 | 8   | Low: 0  | EGD         | Moderate   | Fentanyl or meperidine, plus midazolam | Independent observer | None       | 209 (108, 101) |
| Riphaus 2016 <sup>33</sup>       | Germany | Jun-10, Nov-11 | 5.5 | High: 3 | EUS         | "adequate" | Midazolam and propofol                 | Independent observer | 2 L/minute | 170 (87, 83)   |

† Higher scores indicate higher quality studies. In the present analysis, a score of 6.0–8.0 was designated as high quality.

+, in combination with multiple other agents; BZP, benzodiazepine; Cap, Capnography (arm); EGD, Esophagogastroduodenoscopy; ERCP, Endoscopic retrograde cholangiopancreatography; EUS, Endoscopic ultrasonography

1  
2  
3 **Figure 1** **Severe and mild desaturation are significantly reduced with capnography**  
4  
5 **monitoring**  
6

7  
8 The risk ratios for the endpoints of mild desaturation (A) and severe desaturation (B) are presented. CI,  
9  
10 Confidence interval; M-H, Mantel-Haenszel

11  
12  
13  
14 **Figure 2** **The need for assisted ventilation is reduced with capnography monitoring**  
15

16  
17 ]The odds ratios for the assisted ventilation endpoint are presented for all studies (A), high quality studies (B),  
18  
19 studies with low risk of bias (C), and studies with the end point specified as bag-mask ventilation (D). CI,  
20  
21 Confidence interval; M-H, Mantel-Haenszel  
22  
23  
24  
25  
26  
27  
28  
29  
30  
31  
32  
33  
34  
35  
36  
37  
38  
39  
40  
41  
42  
43  
44  
45  
46  
47  
48  
49  
50  
51  
52  
53  
54  
55  
56  
57  
58  
59  
60



**Table 2** Sensitivity analyses around the primary analyses

| Scenario                             | Desaturation, mild          | Desaturation, severe        | Apnea                       | Bradycardia                 | Hypotension                 | Assisted ventilation | Supplemental oxygen         |
|--------------------------------------|-----------------------------|-----------------------------|-----------------------------|-----------------------------|-----------------------------|----------------------|-----------------------------|
| <b>Base case (all studies)</b>       | <b>0.77</b><br>[0.67, 0.89] | <b>0.59</b><br>[0.43, 0.81] | <b>1.17</b><br>[0.72, 1.89] | <b>1.16</b><br>[0.88, 1.54] | <b>1.02</b><br>[0.78, 1.33] | 0.47<br>[0.23, 0.95] | <b>0.93</b><br>[0.75, 1.15] |
| High quality studies                 | 0.75<br>[0.62, 0.92]        | 0.57<br>[0.36, 0.92]        | 0.89<br>[0.64, 1.23]        | 1.26<br>[0.80, 1.99]        | 0.97<br>[0.73, 1.30]        | 0.56<br>[0.27, 1.20] | 0.98<br>[0.79, 1.23]        |
| Moderate sedation                    | 0.80<br>[0.60, 1.07]        | -                           | 0.99<br>[0.69, 1.42]        | -                           | -                           | -                    | -                           |
| US only                              | 0.80<br>[0.64, 0.99]        | 0.59<br>[0.26, 1.30]        | 0.89<br>[0.64, 1.23]        | -                           | 1.04<br>[0.57, 1.88]        | -                    | -                           |
| Europe only                          | 0.77<br>[0.63, 0.96]        | 0.61<br>[0.44, 0.84]        | 2.83<br>[0.12, 67.30]       | 1.18<br>[0.86, 1.61]        | 0.90<br>[0.66, 1.24]        | 0.49<br>[0.23, 1.03] | 0.91<br>[0.67, 1.25]        |
| Studies with potential bias excluded | 0.78<br>[0.64, 0.95]        | 0.65<br>[0.37, 1.14]        | 0.99<br>[0.69, 1.42]        | 1.26<br>[0.80, 1.99]        | 0.92<br>[0.68, 1.25]        | 0.56<br>[0.27, 1.20] | 1.16<br>[0.95, 1.41]        |
| Studies in pediatrics excluded       | 0.78<br>[0.67, 0.89]        | 0.59<br>[0.43, 0.81]        | 1.29<br>[0.75, 2.23]        | 1.16<br>[0.88, 1.54]        | 1.02<br>[0.78, 1.33]        | 0.47<br>[0.23, 0.95] | 0.92<br>[0.74, 1.14]        |
| Gender-specific studies excluded     | 0.76<br>[0.66, 0.89]        | 0.59<br>[0.41, 0.84]        | 1.17<br>[0.72, 1.89]        | 1.18<br>[0.84, 1.65]        | 1.03<br>[0.75, 1.41]        | 0.49<br>[0.23, 1.03] | 0.84<br>[0.68, 1.03]        |
| Studies with mean age >30 years      | 0.75<br>[0.65, 0.87]        | 0.56<br>[0.41, 0.78]        | 1.29<br>[0.75, 2.23]        | 1.16<br>[0.88, 1.54]        | 1.02<br>[0.78, 1.33]        | 0.47<br>[0.23, 0.95] | 0.87<br>[0.71, 1.07]        |

The reported treatment effect is the risk ratio (RR) [95% confidence interval], except for assisted ventilation where the peto odds ratio (OR) [95% confidence interval] is used. CI, confidence interval; US, United States

## REFERENCES

- 1 Sharma VK, Nguyen CC, Crowell MD, Lieberman DA, de Garmo P, Fleischer DE. A national study of cardiopulmonary unplanned events after GI endoscopy. *Gastrointest Endosc.* 2007;66:27–34.
- 2 Gangi S, Saidi F, Patel K, Johnstone B, Jaeger J, Shine D. Cardiovascular complications after GI endoscopy: occurrence and risks in a large hospital system. *Gastrointest Endosc.* 2004;60:679–85.
- 3 Erden IA, Pamuk AG, Akinci SB, Koseoglu A, Aypar U. Comparison of two ketamine-propofol dosing regimens for sedation during interventional radiology procedures. *Minerva anesthesiologica* 2010;76:260–5.
- 4 Lichtenstein DR, Jagannath S, Baron TH, *et al.* Sedation and anesthesia in GI endoscopy. *Gastrointest Endosc.* 2008;68:205–16.
- 5 Qadeer MA, Vargo JJ, Dumot JA, *et al.* Capnographic monitoring of respiratory activity improves safety of sedation for endoscopic cholangiopancreatography and ultrasonography. *Gastroenterology.* 2009;136:1568–76.
- 6 Lightdale JR, Goldmann DA, Feldman HA, Newburg AR, DiNardo JA, Fox VL. Microstream capnography improves patient monitoring during moderate sedation: a randomized, controlled trial. *Pediatrics.* 2006;117:e1170–8.
- 7 Cotton PB, Eisen GM, Aabakken L, *et al.* A lexicon for endoscopic adverse events: report of an ASGE workshop. *Gastrointest Endosc.* 2010;71:446–54.
- 8 Vargo JJ, Cohen LB, Rex DK, Kwo PY. Position statement: nonanesthesiologist administration of propofol for GI endoscopy. *Gastrointest Endosc.* 2009;70:1053–9.
- 9 Qadeer MA, Rocio Lopez A, Dumot JA, Vargo JJ. Risk Factors for Hypoxemia During Ambulatory Gastrointestinal Endoscopy in ASA I-II Patients. *Dig Dis Sci.* 2009;54(5):1035–40.

- 1  
2  
3  
4<sup>10</sup> Radaelli F, Terruzzi V, Minoli G. Extended/advanced monitoring techniques in gastrointestinal  
5  
6 endoscopy. *Gastrointest Endosc Clin N Am*. 2004;14:335–52.  
7  
8  
9<sup>11</sup> Kober A, Schubert B, Bertalanffy P, et al. Capnography in non-tracheally intubated emergency  
10  
11 patients as an additional tool in pulse oximetry for prehospital monitoring of respiration. *Anesth*  
12  
13 *Analg*. 2004;98:206–10.  
14  
15<sup>12</sup> Soto RG, Fu ES, Vila H, Jr., Miguel RV. Capnography accurately detects apnea during monitored  
16  
17 anesthesia care. *Anesth Analg*. 2004;99:379–82.  
18  
19  
20<sup>13</sup> Thomas PE. What's the latest on carbon dioxide monitoring? *Neonatal Netw*. 2004;23:70–2.  
21  
22  
23<sup>14</sup> Yildzdas D, Yapcoglu H, Ylmaz HL. The value of capnography during sedation or sedation/analgesia  
24  
25 in pediatric minor procedures. *Pediatr Emerg Care*. 2004;20:162–5.  
26  
27  
28<sup>15</sup> American Society for Gastrointestinal Endoscopy, American College of Gastroenterology,  
29  
30 Association TAG. Universal adoption of capnography for moderate sedation in adults undergoing  
31  
32 upper endoscopy and colonoscopy has not been shown to improve patient safety or clinical outcomes  
33  
34 and significantly increases costs for moderate sedation. Available from:  
35  
36 <http://www.asge.org/assets/0/71542/71544/90dc9b63-593d-48a9-bec1-9f0ab3ce946a.pdf> Last  
37  
38 accessed April 11, 2016.  
39  
40  
41<sup>16</sup> Waugh JB, Epps CA, Khodneva YA. Capnography enhances surveillance of respiratory events during  
42  
43 procedural sedation: a meta-analysis. *J Clin Anesth*. 2011;23:189–96.  
44  
45  
46<sup>17</sup> Cook TM. The winds of change - progress in the implementation of universal capnography.  
47  
48 *Anaesthesia*. 2016;71(4):363–8.  
49  
50  
51<sup>18</sup> Sourcerer. Covalence Research Ltd, London, UK. Available at <https://sourcerer.pro/>  
52  
53  
54<sup>19</sup> Jadad AR, Moore RA, Carroll D, et al. Assessing the quality of reports of randomized clinical trials: is  
55  
56 blinding necessary? *Control Clin Trials*. 1996;17(1):1–12.  
57  
58  
59  
60

1  
2  
3  
4 <sup>20</sup> Lexchin J, Bero LA, Djulbegovic B, Clark O. Pharmaceutical industry sponsorship and research  
5  
6 outcome and quality: systematic review. *BMJ*. 2003;326(7400):1167–70.  
7

8  
9 <sup>21</sup> Review Manager. The Nordic Cochrane Centre, The Cochrane Collaboration, Copenhagen, Denmark.  
10

11 <sup>22</sup> Higgins JP, Thompson SG, Deeks JJ, Altman DG. Measuring inconsistency in meta-analyses. *BMJ*.  
12  
13 2003;327(7414):557–560.  
14

15  
16 <sup>23</sup> DerSimonian R, Laird N. Meta-analysis in clinical trials. *Control Clin Trials*. 1986;7(3):177–88.  
17

18  
19 <sup>24</sup> Mantel N, Haenszel W. Statistical aspects of the analysis of data from retrospective studies of  
20  
21 disease. *Journal of the National Cancer Institute* 1959;22:719–48.  
22

23  
24 <sup>25</sup> Mehta PP, Kochhar G, Albeldawi M, *et al*. Capnographic Monitoring in Routine EGD and  
25  
26 Colonoscopy With Moderate Sedation: A Prospective, Randomized, Controlled Trial. *Am J*  
27  
28 *Gastroenterol* 2016;111:395–404.  
29

30  
31 <sup>26</sup> Deitch K, Miner J, Chudnofsky CR, Dominici P, Latta D. Does end tidal CO2 monitoring during  
32  
33 emergency department procedural sedation and analgesia with propofol decrease the incidence of  
34  
35 hypoxic events? A randomized, controlled trial. *Ann Emerg Med*. 2010;55:258–64.  
36

37  
38 <sup>27</sup> van Loon K, van Rheineck Leyssius AT, van Zaane B, Denteneer M, Kalkman CJ. Capnography during  
39  
40 deep sedation with propofol by nonanesthesiologists: a randomized controlled trial. *Anesth Analg*.  
41  
42 2014;119:49–55.  
43

44  
45 <sup>28</sup> Beitz A, Riphaus A, Meining A, *et al*. Capnographic monitoring reduces the incidence of arterial  
46  
47 oxygen desaturation and hypoxemia during propofol sedation for colonoscopy: a randomized,  
48  
49 controlled study (ColoCap Study). *Am J Gastroenterol*. 2012;107:1205–12.  
50

51  
52 <sup>29</sup> Friedrich-Rust M, Welte M, Welte C, *et al*. Capnographic monitoring of propofol-based sedation  
53  
54 during colonoscopy. *Endoscopy*. 2014;46:236–44.  
55  
56  
57  
58  
59  
60

1  
2  
3  
4 <sup>30</sup> Zongming J, Zhonghua C, Xiangming F. Sidestream capnographic monitoring reduces the incidence  
5  
6 of arterial oxygen desaturation during propofol ambulatory anesthesia for surgical abortion. *Med Sci*  
7  
8 *Monit.* 2014;20:2336–42.

9  
10  
11 <sup>31</sup> Langhan ML, Shabanova V, Li FY, Bernstein SL, Shapiro ED. A randomized controlled trial of  
12  
13 capnography during sedation in a pediatric emergency setting. *Am J Emerg Med.* 2015;33:25–30.

14  
15  
16 <sup>32</sup> Slagelse C, Vilmann P, Hornslet P, Jorgensen HL, Horsted TI. The role of capnography in endoscopy  
17  
18 patients undergoing nurse-administered propofol sedation: a randomized study. *Scand J*  
19  
20 *Gastroenterol.* 2013;48(10):1222–30.

21  
22  
23 <sup>33</sup> Riphaut A, Wehrmann T, Kronshage T, *et al.* Clinical value of the Integrated Pulmonary Index(®)  
24  
25 during sedation for interventional upper GI-endoscopy: A randomized, prospective tri-center study.  
26  
27 *Dig Liver Dis.* 2017;49(1):45–49.

28  
29  
30 <sup>34</sup> Klare P, Reiter J, Meining A, *et al.* Capnographic monitoring of midazolam and propofol sedation  
31  
32 during ERCP: a randomized controlled study (EndoBreath Study). *Endoscopy.* 2016;48(1):42–50.

33  
34  
35 <sup>35</sup> Campbell SG, Magee KD, Zed PJ, *et al.* End-tidal capnometry during emergency department  
36  
37 procedural sedation and analgesia: a randomized, controlled study. *World J Emerg Med. World J*  
38  
39 *Emerg Med.* 2016;7(1):13–8.

40  
41  
42 <sup>36</sup> Guimaraes ES, Campbell EJ, Richter JM. The Safety of Nurse-Administered Procedural Sedation  
43  
44 Compared to Anesthesia Care in a Historical Cohort of Advanced Endoscopy Patients. *Anesth Analg.*  
45  
46 2014;119(2):349–56.

47  
48  
49 <sup>37</sup> Zhong B. How to Calculate Sample Size in Randomized Controlled Trial? *J Thorac Dis.* 2009;1(1):51–  
50  
51 54.

52  
53  
54 <sup>38</sup> Saunders R, Ersilon M, Vargo J. Modeling the costs and benefits of capnography monitoring during  
55  
56 procedural sedation for gastrointestinal endoscopy. *Endosc Int Open.* 2016;4(3):E340–51.

1  
2  
3  
4 <sup>39</sup> Berger VW and Alperson SY. A general framework for the evaluation of clinical trial quality. *Rev*  
5  
6 *Recent Clin Trials*. 2009;4(2):79–88.

7  
8  
9 <sup>40</sup> Veerus P, Fischer K, Hakama M, Hemminki E; EPHT Trial. Results from a blind and a non-blind  
10  
11 randomised trial run in parallel: experience from the Estonian Postmenopausal Hormone Therapy  
12  
13 (EPHT) Trial. *BMC Med Res Methodol*. 2012;12:44.

14  
15  
16 <sup>41</sup> Berger VW, Alperson SY. A general framework for the evaluation of clinical trial quality. *Rev Recent*  
17  
18 *Clin Trials*. 2009;4(2):79–88.

19  
20  
21 <sup>42</sup> Ehrenfeld JM, Funk LM, Van Schalkwyk J, Merry AF, Sandberg WS, Gawande A. The incidence of  
22  
23 hypoxemia during surgery: evidence from two institutions. *Can J Anaesth*. 2010;57(10):888–97.

24  
25  
26 <sup>43</sup> Dunham CM, Hileman BM, Hutchinson AE, Chance EA, Huang GS. Perioperative hypoxemia is  
27  
28 common with horizontal positioning during general anesthesia and is associated with major adverse  
29  
30 outcomes: a retrospective study of consecutive patients. *BMC Anesthesiol*. 2014;14:43.

31  
32  
33 <sup>44</sup> Metzner J, Posner KL, Domino KB. The risk and safety of anesthesia at remote locations: the US  
34  
35 closed claims analysis. *Curr Opin Anaesthesiol*. 2009;22(4):502–8.

36  
37  
38 <sup>45</sup> Robbertze R, Posner KL, Domino KB. Closed claims review of anesthesia for procedures outside the  
39  
40 operating room. *Curr Opin Anaesthesiol*. 2006;19(4):436–42.

41  
42  
43 <sup>46</sup> Cook TM, Woodall N, Harper J, Bengner J. Major complications of airway management in the UK:  
44  
45 results of the Fourth National Audit Project of the Royal College of Anaesthetists and the Difficult  
46  
47 Airway Society. Part 2: intensive care and emergency departments. *Br J Anaesth*. 2011;106:632–42.

48  
49  
50 <sup>47</sup> Cook TM, Woodall N, Frerk C; Fourth National Audit Project. Major complications of airway  
51  
52 management in the UK: results of the Fourth National Audit Project of the Royal College of  
53  
54 Anaesthetists and the Difficult Airway Society. Part 1: anaesthesia. *Br J Anaesth*. 2011;106(5):632–42.

1  
2  
3  
4 <sup>48</sup> Campbell SG, Magee KD, Zed PJ, *et al.* End-tidal capnometry during emergency department  
5  
6 procedural sedation and analgesia: a randomized, controlled study. *World J Emerg Med.*  
7  
8 2016;7(1):13–8.  
9

10  
11 <sup>49</sup> LeLorier J, Gregoire G, Benhaddad A, Lapierre J, Derderian F. Discrepancies between meta-analyses  
12  
13 and subsequent large randomized, controlled trials. *N Engl J Med.* 1997;337(8):536–42.  
14

15  
16 <sup>50</sup> Trikalinos TA, Churchill R, Ferri M, *et al.* Effect sizes in cumulative meta-analyses of mental health  
17  
18 randomized trials evolved over time. *J Clin Epidemiol.* 2004;57(11):1124–30.  
19



Severe and mild desaturation are significantly reduced with capnography monitoring  
 Figure 1  
 205x132mm (300 x 300 DPI)



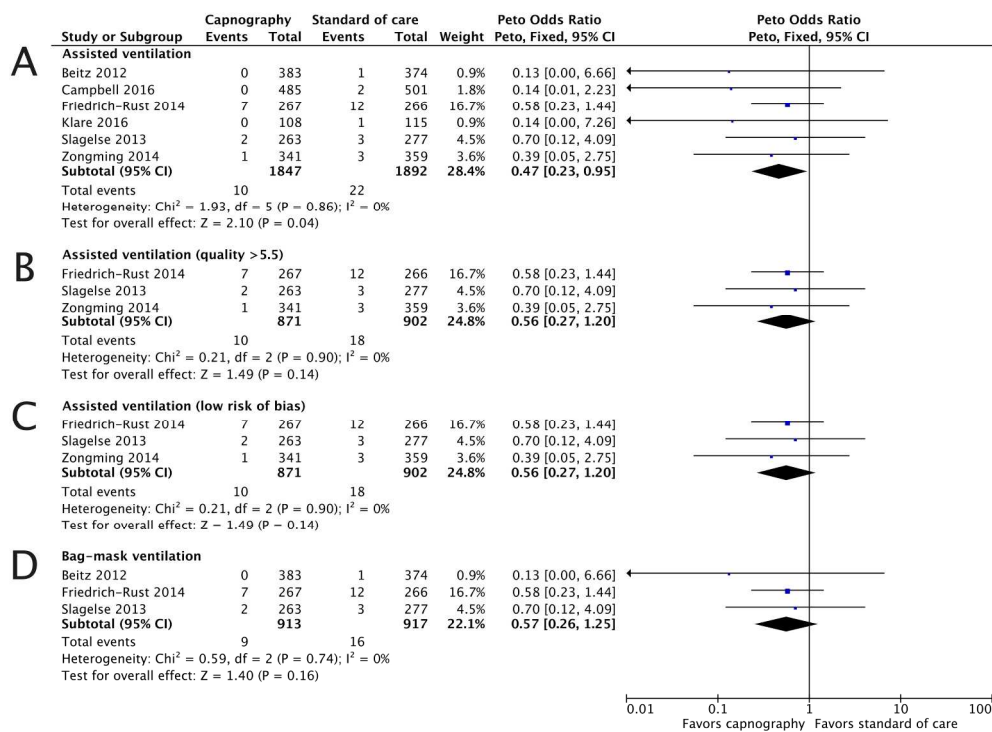

The need for assisted ventilation is reduced with capnography monitoring  
 Figure 2  
 205x152mm (300 x 300 DPI)



# PRISMA 2009 Checklist

| Section/topic                      | #  | Checklist item                                                                                                                                                                                                                                                                                              | Reported on page # |
|------------------------------------|----|-------------------------------------------------------------------------------------------------------------------------------------------------------------------------------------------------------------------------------------------------------------------------------------------------------------|--------------------|
| <b>TITLE</b>                       |    |                                                                                                                                                                                                                                                                                                             |                    |
| Title                              | 1  | Identify the report as a systematic review, meta-analysis, or both.                                                                                                                                                                                                                                         | 1                  |
| <b>ABSTRACT</b>                    |    |                                                                                                                                                                                                                                                                                                             |                    |
| Structured summary                 | 2  | Provide a structured summary including, as applicable: background; objectives; data sources; study eligibility criteria, participants, and interventions; study appraisal and synthesis methods; results; limitations; conclusions and implications of key findings; systematic review registration number. | 2-3                |
| <b>INTRODUCTION</b>                |    |                                                                                                                                                                                                                                                                                                             |                    |
| Rationale                          | 3  | Describe the rationale for the review in the context of what is already known.                                                                                                                                                                                                                              | 4                  |
| Objectives                         | 4  | Provide an explicit statement of questions being addressed with reference to participants, interventions, comparisons, outcomes, and study design (PICOS).                                                                                                                                                  | 4                  |
| <b>METHODS</b>                     |    |                                                                                                                                                                                                                                                                                                             |                    |
| Protocol and registration          | 5  | Indicate if a review protocol exists, if and where it can be accessed (e.g., Web address), and, if available, provide registration information including registration number.                                                                                                                               | 5                  |
| Eligibility criteria               | 6  | Specify study characteristics (e.g., PICOS, length of follow-up) and report characteristics (e.g., years considered, language, publication status) used as criteria for eligibility, giving rationale.                                                                                                      | 5-6                |
| Information sources                | 7  | Describe all information sources (e.g., databases with dates of coverage, contact with study authors to identify additional studies) in the search and date last searched.                                                                                                                                  | 5                  |
| Search                             | 8  | Present full electronic search strategy for at least one database, including any limits used, such that it could be repeated.                                                                                                                                                                               | 22                 |
| Study selection                    | 9  | State the process for selecting studies (i.e., screening, eligibility, included in systematic review, and, if applicable, included in the meta-analysis).                                                                                                                                                   | 22                 |
| Data collection process            | 10 | Describe method of data extraction from reports (e.g., piloted forms, independently, in duplicate) and any processes for obtaining and confirming data from investigators.                                                                                                                                  | 5                  |
| Data items                         | 11 | List and define all variables for which data were sought (e.g., PICOS, funding sources) and any assumptions and simplifications made.                                                                                                                                                                       | 6                  |
| Risk of bias in individual studies | 12 | Describe methods used for assessing risk of bias of individual studies (including specification of whether this was done at the study or outcome level), and how this information is to be used in any data synthesis.                                                                                      | 6                  |
| Summary measures                   | 13 | State the principal summary measures (e.g., risk ratio, difference in means).                                                                                                                                                                                                                               | 7                  |
| Synthesis of results               | 14 | Describe the methods of handling data and combining results of studies, if done, including measures of consistency (e.g., $I^2$ ) for each meta-analysis.                                                                                                                                                   | 7                  |

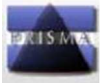

# PRISMA 2009 Checklist

| Section/topic                 | #  | Checklist item                                                                                                                                                                                           | Reported on page # |
|-------------------------------|----|----------------------------------------------------------------------------------------------------------------------------------------------------------------------------------------------------------|--------------------|
| Risk of bias across studies   | 15 | Specify any assessment of risk of bias that may affect the cumulative evidence (e.g., publication bias, selective reporting within studies).                                                             | 6                  |
| Additional analyses           | 16 | Describe methods of additional analyses (e.g., sensitivity or subgroup analyses, meta-regression), if done, indicating which were pre-specified.                                                         | 7                  |
| <b>RESULTS</b>                |    |                                                                                                                                                                                                          |                    |
| Study selection               | 17 | Give numbers of studies screened, assessed for eligibility, and included in the review, with reasons for exclusions at each stage, ideally with a flow diagram.                                          | 23                 |
| Study characteristics         | 18 | For each study, present characteristics for which data were extracted (e.g., study size, PICOS, follow-up period) and provide the citations.                                                             | 19,24              |
| Risk of bias within studies   | 19 | Present data on risk of bias of each study and, if available, any outcome level assessment (see item 12).                                                                                                | 16                 |
| Results of individual studies | 20 | For all outcomes considered (benefits or harms), present, for each study: (a) simple summary data for each intervention group (b) effect estimates and confidence intervals, ideally with a forest plot. | 17,24-27           |
| Synthesis of results          | 21 | Present results of each meta-analysis done, including confidence intervals and measures of consistency.                                                                                                  | 17,24-27           |
| Risk of bias across studies   | 22 | Present results of any assessment of risk of bias across studies (see Item 15).                                                                                                                          | 18                 |
| Additional analysis           | 23 | Give results of additional analyses, if done (e.g., sensitivity or subgroup analyses, meta-regression [see Item 16]).                                                                                    | 18                 |
| <b>DISCUSSION</b>             |    |                                                                                                                                                                                                          |                    |
| Summary of evidence           | 24 | Summarize the main findings including the strength of evidence for each main outcome; consider their relevance to key groups (e.g., healthcare providers, users, and policy makers).                     | 12-13              |
| Limitations                   | 25 | Discuss limitations at study and outcome level (e.g., risk of bias), and at review-level (e.g., incomplete retrieval of identified research, reporting bias).                                            | 13                 |
| Conclusions                   | 26 | Provide a general interpretation of the results in the context of other evidence, and implications for future research.                                                                                  | 13                 |
| <b>FUNDING</b>                |    |                                                                                                                                                                                                          |                    |
| Funding                       | 27 | Describe sources of funding for the systematic review and other support (e.g., supply of data); role of funders for the systematic review.                                                               | 14                 |

From: Moher D, Liberati A, Tetzlaff J, Altman DG, The PRISMA Group (2009). Preferred Reporting Items for Systematic Reviews and Meta-Analyses: The PRISMA Statement. PLoS Med 6(7): e1000097. doi:10.1371/journal.pmed1000097

For more information, visit: [www.prisma-statement.org](http://www.prisma-statement.org).
